# Supplementary material for: Plasticity and evolutionary convergence in the locomotor skeleton of Greater Antillean Anolis lizards
Source: eLife journal article supplement (doi:10.7554/elife.57468), 2020-08-13
Supplement: supp [file elife-57468-supp-v1.zip]

Archive with 7 entries (7 files):
- elife_poa_e57468_Figure_2_figure_supplement_1.pdf
- elife_poa_e57468_Figure_4_figure_supplement_1.pdf
- elife_poa_e57468_Figure_4_figure_supplement_2.pdf
- elife_poa_e57468_Transparent_Reporting_File.pdf
- elife_poa_e57468_Supplementary_file_1.docx
- elife_poa_e57468_Source_data_1.csv
- elife_poa_e57468_Source_data_2.csv
