# Supplementary material for: Plasticity and evolutionary convergence in the locomotor skeleton of Greater Antillean Anolis lizards
Source: eLife journal article supplement (doi:10.7554/elife.57468), 2020-08-13

# Ecomorph

- trunk-ground
- trunk-crown
- crown-giant
- twig
- grass-bush
- trunk

# Island

- Cuba
- Hispaniola
- Jamaica
- Puerto Rico

A

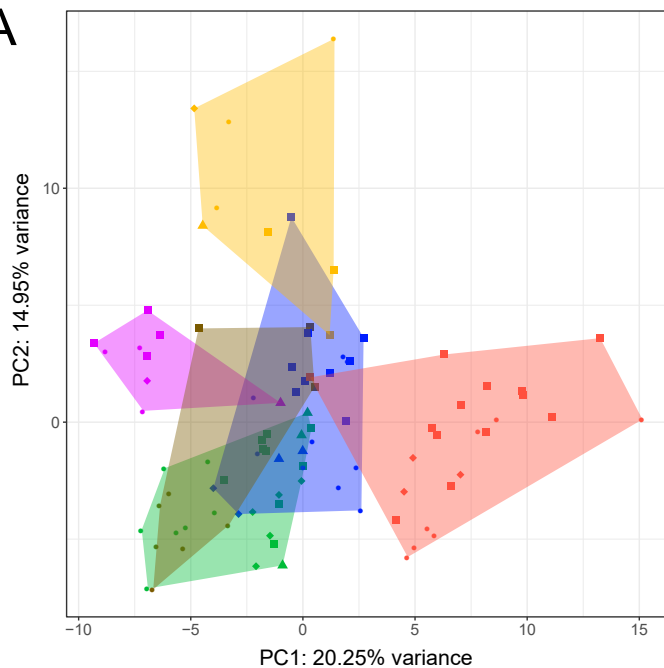

B

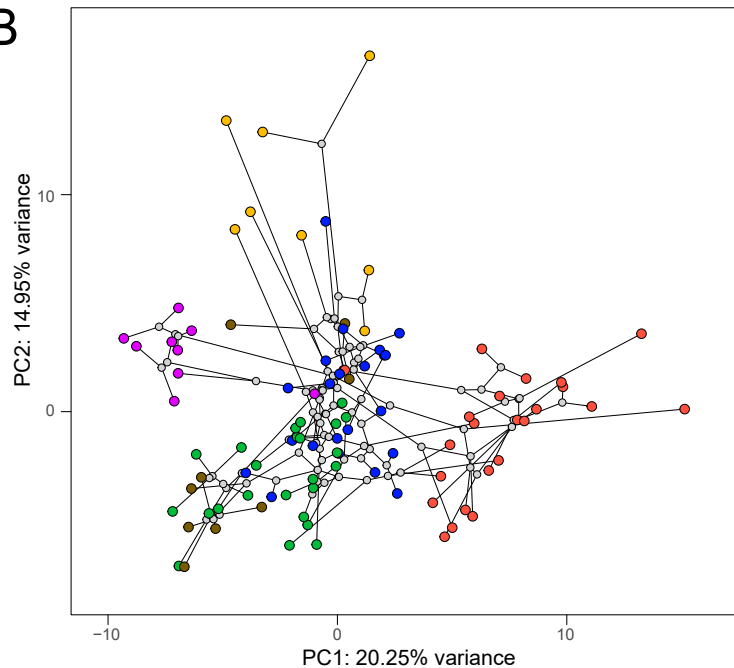

C

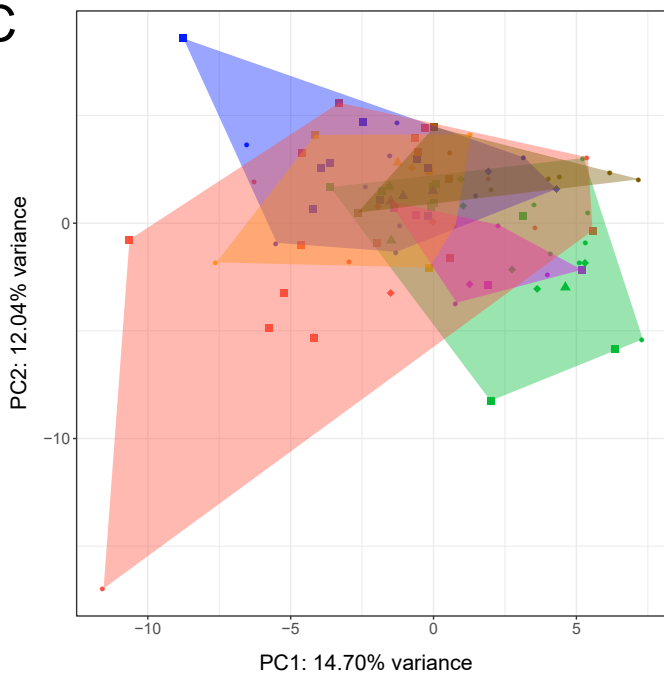

D

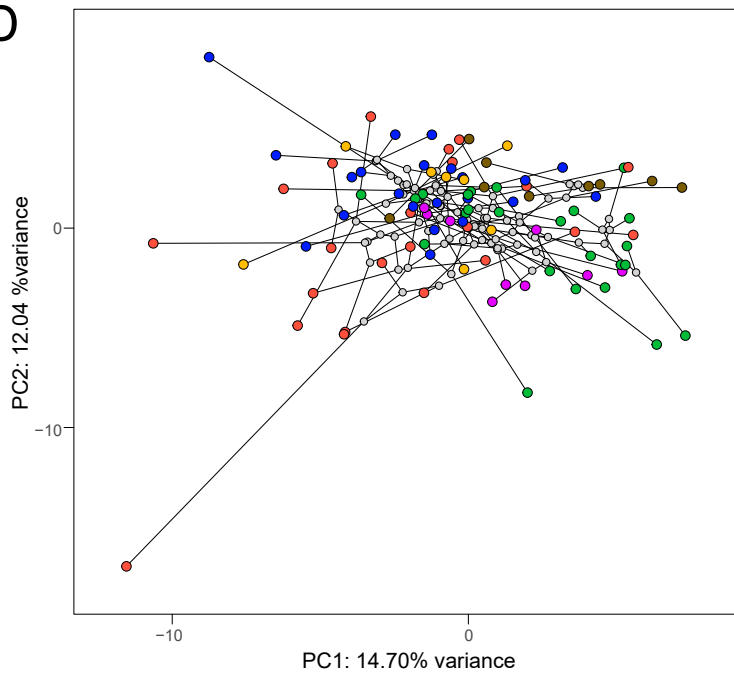

Supplement: supp [file elife-57468-supp-v1.zip › elife_poa_e57468_Figure_2_figure_supplement_1.pdf]
