# Supplementary material for: Plasticity and evolutionary convergence in the locomotor skeleton of Greater Antillean Anolis lizards
Source: eLife journal article supplement (doi:10.7554/elife.57468), 2020-08-13
Supplement: supp [file elife-57468-supp-v1.zip › elife_poa_e57468_Source_data_1.csv]

ID	Species	Specimen	Museum_Collection	Country_Island	Ecomorph
AMNH_49700	websteri	49700	AMNH	Hispaniola	Trunk
AMNH_95987	alutaceus	95987	AMNH	Cuba	Grass-Bush
CAS_9286	paternus	9286	CAS	Cuba	Twig
CAS_9287	paternus	9287	CAS	Cuba	Twig
CAS_9288	paternus	9288	CAS	Cuba	Twig
CMNH_52300	sheplani	52300	CMNH	Hispaniola	Twig
CMNH_54140	sheplani	54140	CMNH	Hispaniola	Twig
CMNH_54141	sheplani	54141	CMNH	Hispaniola	Twig
FMNH_224934	peynadoi	224934	FMNH	Hispaniola	Trunk-Crown
FMNH_224935	peynadoi	224935	FMNH	Hispaniola	Trunk-Crown
FMNH_224936	peynadoi	224936	FMNH	Hispaniola	Trunk-Crown
KU_216097	singularis	216097	KU	Hispaniola	Trunk-Crown
KU_246967	smallwoodi	246967	KU	Cuba	Crown-Giant
KU_246969	smallwoodi	246969	KU	Cuba	Crown-Giant
KU_250347	alumina	250347	KU	Hispaniola	Grass-Bush
KU_250348	alumina	250348	KU	Hispaniola	Grass-Bush
KU_250788	baleatus	250788	KU	Hispaniola	Crown-Giant
KU_250797	baleatus	250797	KU	Hispaniola	Crown-Giant
KU_250808	baleatus	250808	KU	Hispaniola	Crown-Giant
KU_251847	caudalis	251847	KU	Hispaniola	Trunk
KU_251852	caudalis	251852	KU	Hispaniola	Trunk
KU_251867	caudalis	251867	KU	Hispaniola	Trunk
KU_253043	chlorodius	253043	KU	Hispaniola	Trunk-Crown
KU_253064	eladioi	253064	KU	Hispaniola	Trunk-Crown
KU_257756	koopmani	257756	KU	Hispaniola	Grass-Bush
KU_257780	insolitus	257780	KU	Hispaniola	Twig
KU_259853	marron	259853	KU	Hispaniola	Trunk
KU_259854	marron	259854	KU	Hispaniola	Trunk
KU_259855	marron	259855	KU	Hispaniola	Trunk
KU_259999	juangundlachi	259999	KU	Cuba	Grass-Bush
KU_317219	longitibialis	317219	KU	Hispaniola	Trunk-Ground
KU_317221	longitibialis	317221	KU	Hispaniola	Trunk-Ground
KU_317229	longitibialis	317229	KU	Hispaniola	Trunk-Ground
LACM_113841	reconditus	113841	LACM	Jamaica	Trunk-Ground
LACM_135076	barahonae	135076	LACM	Hispaniola	Crown-Giant
LACM_135079	barahonae	135079	LACM	Hispaniola	Crown-Giant
LACM_61757	shrevei	61757	LACM	Hispaniola	Trunk-Ground
MCZ_111205	clivicola	111205	MCZ	Cuba	Grass-Bush
MCZ_111207	clivicola	111207	MCZ	Cuba	Grass-Bush
MCZ_111209	clivicola	111209	MCZ	Cuba	Grass-Bush
MCZ_120101	cyanopleurus	120101	MCZ	Cuba	Grass-Bush
MCZ_125504	barahonae	125504	MCZ	Hispaniola	Crown-Giant
MCZ_127121	cuvieri	127121	MCZ	Puerto Rico	Crown-Giant
MCZ_127123	cuvieri	127123	MCZ	Puerto Rico	Crown-Giant
MCZ_127124	cuvieri	127124	MCZ	Puerto Rico	Crown-Giant
MCZ_127126	cuvieri	127126	MCZ	Puerto Rico	Crown-Giant
MCZ_127127	cuvieri	127127	MCZ	Puerto Rico	Crown-Giant
MCZ_139577	baracoae	139577	MCZ	Cuba	Crown-Giant
MCZ_139578	baracoae	139578	MCZ	Cuba	Crown-Giant
MCZ_139589	baracoae	139589	MCZ	Cuba	Crown-Giant
MCZ_141423	porcatus	141423	MCZ	Cuba	Trunk-Crown
MCZ_141427	porcatus	141427	MCZ	Cuba	Trunk-Crown
MCZ_141428	porcatus	141428	MCZ	Cuba	Trunk-Crown
MCZ_141430	porcatus	141430	MCZ	Cuba	Trunk-Crown
MCZ_146726	barahonae	146726	MCZ	Hispaniola	Crown-Giant
MCZ_151881	strahmi	151881	MCZ	Hispaniola	Trunk-Ground
MCZ_151883	strahmi	151883	MCZ	Hispaniola	Trunk-Ground
MCZ_155867	juangundlachi	155867	MCZ	Cuba	Grass-Bush
MCZ_156967	occultus	156967	MCZ	Puerto Rico	Twig
MCZ_160634	rejectus	160634	MCZ	Cuba	Grass-Bush
MCZ_160635	rejectus	160635	MCZ	Cuba	Grass-Bush
MCZ_160648	fugitivus	160648	MCZ	Cuba	Grass-Bush
MCZ_160653	cupeyalensis	160653	MCZ	Cuba	Grass-Bush
MCZ_160656	spectrum	160656	MCZ	Cuba	Grass-Bush
MCZ_160658	anfiloquioi	160658	MCZ	Cuba	Grass-Bush
MCZ_160659	anfiloquioi	160659	MCZ	Cuba	Grass-Bush
MCZ_178766	guafe	178766	MCZ	Cuba	Trunk-Ground
MCZ_178770	pumilus	178770	MCZ	Cuba	Grass-Bush
MCZ_183272	fairchildi	183272	MCZ	Cuba	Trunk-Crown
MCZ_186217	luteogularis	186217	MCZ	Cuba	Crown-Giant
MCZ_186656	baleatus	186656	MCZ	Hispaniola	Crown-Giant
MCZ_186657	baleatus	186657	MCZ	Hispaniola	Crown-Giant
MCZ_186696	insolitus	186696	MCZ	Hispaniola	Twig
MCZ_186700	insolitus	186700	MCZ	Hispaniola	Twig
MCZ_186701	insolitus	186701	MCZ	Hispaniola	Twig
MCZ_186705	insolitus	186705	MCZ	Hispaniola	Twig
MCZ_186707	insolitus	186707	MCZ	Hispaniola	Twig
MCZ_189864	smallwoodi	189864	MCZ	Cuba	Crown-Giant
MCZ_189933	ophiolepis	189933	MCZ	Cuba	Grass-Bush
MCZ_192645	valencienni	192645	MCZ	Jamaica	Twig
MCZ_193392	placidus	193392	MCZ	Hispaniola	Twig
MCZ_193393	placidus	193393	MCZ	Hispaniola	Twig
MCZ_21850	ahli	21850	MCZ	Cuba	Trunk-Ground
MCZ_21851	ahli	21851	MCZ	Cuba	Trunk-Ground
MCZ_34821	krugi	34821	MCZ	Puerto Rico	Grass-Bush
MCZ_35970	cuvieri	35970	MCZ	Puerto Rico	Crown-Giant
MCZ_35972	cuvieri	35972	MCZ	Puerto Rico	Crown-Giant
MCZ_35976	cuvieri	35976	MCZ	Puerto Rico	Crown-Giant
MCZ_35977	cuvieri	35977	MCZ	Puerto Rico	Crown-Giant
MCZ_35980	cuvieri	35980	MCZ	Puerto Rico	Crown-Giant
MCZ_38408	luteogularis	38408	MCZ	Cuba	Crown-Giant
MCZ_39692	guazuma	39692	MCZ	Cuba	Twig
MCZ_42489	isolepis	42489	MCZ	Cuba	Trunk-Crown
MCZ_42562	cyanopleurus	42562	MCZ	Cuba	Grass-Bush
MCZ_52001	valencienni	52001	MCZ	Jamaica	Twig
MCZ_57898	cuvieri	57898	MCZ	Puerto Rico	Crown-Giant
MCZ_59237	paternus	59237	MCZ	Cuba	Twig
MCZ_59240	paternus	59240	MCZ	Cuba	Twig
MCZ_59242	paternus	59242	MCZ	Cuba	Twig
MCZ_59324	smallwoodi	59324	MCZ	Cuba	Crown-Giant
MCZ_60876	allisoni	60876	MCZ	Cuba	Trunk-Crown
MCZ_60902	allisoni	60902	MCZ	Cuba	Trunk-Crown
MCZ_60903	allisoni	60903	MCZ	Cuba	Trunk-Crown
MCZ_61974	poncensis	61974	MCZ	Puerto Rico	Grass-Bush
MCZ_61989	poncensis	61989	MCZ	Puerto Rico	Grass-Bush
MCZ_63663	rubribarbus	63663	MCZ	Cuba	Trunk-Ground
MCZ_63671	rubribarbus	63671	MCZ	Cuba	Trunk-Ground
MCZ_63686	mestrei	63686	MCZ	Cuba	Trunk-Ground
MCZ_63699	mestrei	63699	MCZ	Cuba	Trunk-Ground
MCZ_73928	inexpectatus	73928	MCZ	Cuba	Grass-Bush
MCZ_73929	inexpectatus	73929	MCZ	Cuba	Grass-Bush
MCZ_73930	inexpectatus	73930	MCZ	Cuba	Grass-Bush
MCZ_74028	jubar	74028	MCZ	Cuba	Trunk-Ground
MCZ_74029	jubar	74029	MCZ	Cuba	Trunk-Ground
MCZ_74030	jubar	74030	MCZ	Cuba	Trunk-Ground
MCZ_74044	loysiana	74044	MCZ	Cuba	Trunk
MCZ_74048	loysiana	74048	MCZ	Cuba	Trunk
MCZ_74080	vanidicus	74080	MCZ	Cuba	Grass-Bush
MCZ_74083	vanidicus	74083	MCZ	Cuba	Grass-Bush
MCZ_7897	loysiana	7897	MCZ	Cuba	Trunk
MCZ_7905	luteogularis	7905	MCZ	Cuba	Crown-Giant
MCZ_83656	occultus	83656	MCZ	Puerto Rico	Twig
MCZ_83666	occultus	83666	MCZ	Puerto Rico	Twig
MCZ_92726	occultus	92726	MCZ	Puerto Rico	Twig
MCZ_93574	quadriocellifer	93574	MCZ	Cuba	Trunk-Ground
MVZ_226113	cooki	226113	MVZ	Puerto Rico	Trunk-Ground
MVZ_226114	cooki	226114	MVZ	Puerto Rico	Trunk-Ground
MVZ_226115	cooki	226115	MVZ	Puerto Rico	Trunk-Ground
MVZ_235317	desechensis	235317	MVZ	Puerto Rico	Trunk-Ground
MVZ_235320	desechensis	235320	MVZ	Puerto Rico	Trunk-Ground
MVZ_235323	desechensis	235323	MVZ	Puerto Rico	Trunk-Ground
MVZ_257608	poncensis	257608	MVZ	Puerto Rico	Grass-Bush
MVZ_257612	poncensis	257612	MVZ	Puerto Rico	Grass-Bush
MVZ_257613	poncensis	257613	MVZ	Puerto Rico	Grass-Bush
TCWC_50570	marcanoi	50570	TCWC	Hispaniola	Trunk-Ground
TCWC_50579	marcanoi	50579	TCWC	Hispaniola	Trunk-Ground
TCWC_50585	marcanoi	50585	TCWC	Hispaniola	Trunk-Ground
UF_116081	longiceps	116081	UF	Cuba	Trunk-Crown
UF_120916	bahorucoensis	120916	UF	Hispaniola	Grass-Bush
UF_120918	bahorucoensis	120918	UF	Hispaniola	Grass-Bush
UF_120920	bahorucoensis	120920	UF	Hispaniola	Grass-Bush
UF_121720	conspersus	121720	UF	Jamaica	Trunk-Ground
UF_121745	cristatellus	121745	UF	Puerto Rico	Trunk-Ground
UF_121774	cristatellus	121774	UF	Puerto Rico	Trunk-Ground
UF_121859	cybotes	121859	UF	Hispaniola	Trunk-Ground
UF_121992	evermanni	121992	UF	Puerto Rico	Trunk-Crown
UF_121994	evermanni	121994	UF	Puerto Rico	Trunk-Crown
UF_122005	garmani	122005	UF	Jamaica	Crown-Giant
UF_122009	garmani	122009	UF	Jamaica	Crown-Giant
UF_122044	homolechis	122044	UF	Cuba	Trunk-Ground
UF_122045	homolechis	122045	UF	Cuba	Trunk-Ground
UF_12270_6	chlorocyanus	12270_6	UF	Hispaniola	Trunk-Crown
UF_12271_2	chlorocyanus	12271_2	UF	Hispaniola	Trunk-Crown
UF_122732	opalinus	122732	UF	Jamaica	Trunk-Crown
UF_122740	opalinus	122740	UF	Jamaica	Trunk-Crown
UF_122777	opalinus	122777	UF	Jamaica	Trunk-Crown
UF_12286_3	brevirostris	12286_3	UF	Hispaniola	Trunk
UF_124385	shrevei	124385	UF	Hispaniola	Trunk-Ground
UF_124386	shrevei	124386	UF	Hispaniola	Trunk-Ground
UF_124393	stratulus	124393	UF	Puerto Rico	Trunk-Crown
UF_124394	stratulus	124394	UF	Puerto Rico	Trunk-Crown
UF_124441	valencienni	124441	UF	Jamaica	Twig
UF_124449	valencienni	124449	UF	Jamaica	Twig
UF_15358	aliniger	15358	UF	Hispaniola	Trunk-Crown
UF_15359	aliniger	15359	UF	Hispaniola	Trunk-Crown
UF_16604	angusticeps	16604	UF	Cuba	Twig
UF_16606	angusticeps	16606	UF	Cuba	Twig
UF_16613	carolinensis	16613	UF	Cuba	Trunk-Crown
UF_16622	carolinensis	16622	UF	Cuba	Trunk-Crown
UF_169174	conspersus	169174	UF	Jamaica	Trunk-Ground
UF_169364	conspersus	169364	UF	Jamaica	Trunk-Ground
UF_16970	cristatellus	16970	UF	Puerto Rico	Trunk-Ground
UF_16981	cristatellus	16981	UF	Puerto Rico	Trunk-Ground
UF_174223	whitemani	174223	UF	Hispaniola	Trunk-Ground
UF_17467	equestris	17467	UF	Cuba	Crown-Giant
UF_17468	equestris	17468	UF	Cuba	Crown-Giant
UF_17996	carolinensis	17996	UF	Cuba	Trunk-Crown
UF_18485	lineatopus	18485	UF	Jamaica	Trunk-Ground
UF_18515	grahami	18515	UF	Jamaica	Trunk-Crown
UF_18517	grahami	18517	UF	Jamaica	Trunk-Crown
UF_18548	valencienni	18548	UF	Jamaica	Twig
UF_18606	reconditus	18606	UF	Jamaica	Trunk-Ground
UF_18607	reconditus	18607	UF	Jamaica	Trunk-Ground
UF_18639	lineatopus	18639	UF	Jamaica	Trunk-Ground
UF_18717	lineatopus	18717	UF	Jamaica	Trunk-Ground
UF_21653	garmani	21653	UF	Jamaica	Crown-Giant
UF_21860	longiceps	21860	UF	Cuba	Trunk-Crown
UF_21864	longiceps	21864	UF	Cuba	Trunk-Crown
UF_21869	allogus	21869	UF	Cuba	Trunk-Ground
UF_21874	allogus	21874	UF	Cuba	Trunk-Ground
UF_21876	argillaceus	21876	UF	Cuba	Trunk
UF_21877	argillaceus	21877	UF	Cuba	Trunk
UF_21920	allogus	21920	UF	Cuba	Trunk-Ground
UF_21930	argillaceus	21930	UF	Cuba	Trunk
UF_23606	sagrei	23606	UF	Cuba	Trunk-Ground
UF_3278	equestris	3278	UF	Cuba	Crown-Giant
UF_33261	sagrei	33261	UF	Cuba	Trunk-Ground
UF_33262	sagrei	33262	UF	Cuba	Trunk-Ground
UF_36968_3	altavelensis	36968	UF	Hispaniola	Trunk
UF_37223	stratulus	37223	UF	Puerto Rico	Trunk-Crown
UF_39311	grahami	39311	UF	Jamaica	Trunk-Crown
UF_39480	monensis	39480	UF	Puerto Rico	Trunk-Ground
UF_39481	monensis	39481	UF	Puerto Rico	Trunk-Ground
UF_39501	monensis	39501	UF	Puerto Rico	Trunk-Ground
UF_39764	krugi	39764	UF	Puerto Rico	Grass-Bush
UF_46136	dolichocephalus	46136	UF	Hispaniola	Grass-Bush
UF_46152	websteri	46152	UF	Hispaniola	Trunk
UF_47698	krugi	47698	UF	Puerto Rico	Grass-Bush
UF_56833	dolichocephalus	56833	UF	Hispaniola	Grass-Bush
UF_58094	ricordii	58094	UF	Hispaniola	Crown-Giant
UF_58550	dolichocephalus	58550	UF	Hispaniola	Grass-Bush
UF_59099	coelestinus	59099	UF	Hispaniola	Trunk-Crown
UF_59126	coelestinus	59126	UF	Hispaniola	Trunk-Crown
UF_59129	coelestinus	59129	UF	Hispaniola	Trunk-Crown
UF_59633	armouri	59633	UF	Hispaniola	Trunk-Ground
UF_59850	armouri	59850	UF	Hispaniola	Trunk-Ground
UF_63459	maynardi	63459	UF	Cuba	Trunk-Crown
UF_63460	maynardi	63460	UF	Cuba	Trunk-Crown
UF_7711	angusticeps	7711	UF	Cuba	Twig
UF_81573	smaragdinus	81573	UF	Cuba	Trunk-Crown
UF_84754	distichus	84754	UF	Hispaniola	Trunk
UF_85084	gundlachi	85084	UF	Puerto Rico	Trunk-Ground
UF_85085	gundlachi	85085	UF	Puerto Rico	Trunk-Ground
UF_85087	gundlachi	85087	UF	Puerto Rico	Trunk-Ground
UF_86733	olssoni	86733	UF	Hispaniola	Grass-Bush
UF_86737	olssoni	86737	UF	Hispaniola	Grass-Bush
UF_86742	olssoni	86742	UF	Hispaniola	Grass-Bush
UF_90465	ricordii	90465	UF	Hispaniola	Crown-Giant
UF_90466	ricordii	90466	UF	Hispaniola	Crown-Giant
UF_90929	homolechis	90929	UF	Cuba	Trunk-Ground
UF_90934	whitemani	90934	UF	Hispaniola	Trunk-Ground
UF_90936	whitemani	90936	UF	Hispaniola	Trunk-Ground
UF_90968	distichus	90968	UF	Hispaniola	Trunk
UF_90983	hendersoni	90983	UF	Hispaniola	Grass-Bush
UF_90987	hendersoni	90987	UF	Hispaniola	Grass-Bush
UF_90991	hendersoni	90991	UF	Hispaniola	Grass-Bush
UF_91225	krugi	91225	UF	Puerto Rico	Grass-Bush
UF_91238	semilineatus	91238	UF	Hispaniola	Grass-Bush
UF_91239	semilineatus	91239	UF	Hispaniola	Grass-Bush
UF_91245	pulchellus	91245	UF	Puerto Rico	Grass-Bush
UF_91246	pulchellus	91246	UF	Puerto Rico	Grass-Bush
UF_91248	pulchellus	91248	UF	Puerto Rico	Grass-Bush
UF_91267	brevirostris	91267	UF	Hispaniola	Trunk
UF_91294	brunneus	91294	UF	Cuba	Trunk-Crown
UF_91295	brunneus	91295	UF	Cuba	Trunk-Crown
UMMZ_73630	cuvieri	73630	UMMZ	Puerto Rico	Crown-Giant
UMMZ_73635_1	cuvieri	73635	UMMZ	Puerto Rico	Crown-Giant
UMMZ_73635_2	cuvieri	73635	UMMZ	Puerto Rico	Crown-Giant
USNM_160728	pecuarius	160728	USNM	Hispaniola	Trunk-Crown
USNM_259373	viridius	259373	USNM	Hispaniola	Trunk-Crown
USNM_259376	viridius	259376	USNM	Hispaniola	Trunk-Crown
USNM_315901	centralis	315901	USNM	Cuba	Trunk
USNM_315904	centralis	315904	USNM	Cuba	Trunk
USNM_315906	centralis	315906	USNM	Cuba	Trunk
USNM_498092	pumilus	498092	USNM	Cuba	Grass-Bush
USNM_498099	pumilus	498099	USNM	Cuba	Grass-Bush
USNM_558716	chlorodius	558716	USNM	Hispaniola	Trunk-Crown
USNM_589689	guazuma	589689	USNM	Cuba	Twig
USNM_589691	guazuma	589691	USNM	Cuba	Twig
