# Supplementary material for: Plasticity and evolutionary convergence in the locomotor skeleton of Greater Antillean Anolis lizards
Source: eLife journal article supplement (doi:10.7554/elife.57468), 2020-08-13
Supplement: supp [file elife-57468-supp-v1.zip › elife_poa_e57468_Source_data_2.csv]

IDs	pec_Coords.1.X	pec_Coords.1.Y	pec_Coords.1.Z	pec_Coords.2.X	pec_Coords.2.Y	pec_Coords.2.Z	pec_Coords.3.X	pec_Coords.3.Y	pec_Coords.3.Z	pec_Coords.4.X	pec_Coords.4.Y	pec_Coords.4.Z	pec_Coords.5.X	pec_Coords.5.Y	pec_Coords.5.Z	pec_Coords.6.X	pec_Coords.6.Y	pec_Coords.6.Z	pec_Coords.7.X	pec_Coords.7.Y	pec_Coords.7.Z	pec_Coords.8.X	pec_Coords.8.Y	pec_Coords.8.Z	pec_Coords.9.X	pec_Coords.9.Y	pec_Coords.9.Z	pec_Coords.10.X	pec_Coords.10.Y	pec_Coords.10.Z	pec_Coords.11.X	pec_Coords.11.Y	pec_Coords.11.Z	pec_Coords.12.X	pec_Coords.12.Y	pec_Coords.12.Z	pec_Coords.13.X	pec_Coords.13.Y	pec_Coords.13.Z	pec_Coords.14.X	pec_Coords.14.Y	pec_Coords.14.Z	pec_Coords.15.X	pec_Coords.15.Y	pec_Coords.15.Z	pec_Coords.16.X	pec_Coords.16.Y	pec_Coords.16.Z	pec_Coords.17.X
AMNH_49700	-0.168908242	-0.092435045	0.043980506	-0.292880925	0.210899344	-0.089649434	-0.202508139	0.194706608	-0.044974479	0.102381607	-0.003400887	0.096382933	-0.061237956	0.09087826	0.112278845	-0.131812177	-0.187006612	-0.070971788	-0.153783048	-0.211012371	-0.063563677	-0.012286907	-0.224609178	-0.062970735	-0.163826291	-0.028239156	-0.019634677	-0.076276156	0.081361934	0.060224127	-0.080015699	-0.015814105	0.055499082	-0.04020911	0.194152449	-0.074960374	0.277001378	0.028941257	0.010398528	0.353831676	0.006092219	-0.040766855	0.420982696	-0.009667865	-0.106767759	0.151379707	0.014565483	0.058077405	0.095355717
AMNH_95987	-0.137998879	-0.037603882	0.086862992	-0.309760073	0.210898692	-0.085265609	-0.249506183	0.191577225	-0.046720362	0.125231918	0.022412859	0.048858926	-0.139493167	0.034206053	0.106518228	-0.146377896	-0.20153206	-0.071750101	-0.166982676	-0.206694814	-0.058700706	-0.053051838	-0.234556738	-0.067968145	-0.127903218	-0.025400975	0.023600737	-0.059921805	0.076070092	0.041787073	-0.055843248	-0.005933498	0.042870155	0.017170768	0.170700444	-0.042215644	0.238926826	0.039039509	0.017487894	0.325633567	0.02012421	-0.033505365	0.447587976	-0.035861708	-0.053202182	0.150573915	0.017247258	0.032990717	0.125281267
CAS_9286	-0.165257835	-0.085751248	0.068094761	-0.280176658	0.227341606	-0.059905542	-0.201043016	0.173516807	-0.030258522	0.099558732	0.037517657	0.057569297	-0.132565926	0.045106131	0.105424827	-0.135866068	-0.168135772	-0.041876629	-0.137556977	-0.195926712	-0.048849447	-0.048324753	-0.203733412	-0.049061491	-0.147030149	-0.032278383	-0.018946453	-0.083637185	0.052106633	0.022370139	-0.07624373	-0.016420112	0.029566542	-0.035593372	0.151842567	-0.056353594	0.268546836	0.029055025	-0.010732251	0.377351088	0.02052389	-0.049319937	0.498496847	-0.029038856	-0.060273165	0.129290546	-0.001205501	0.044080245	0.084468524
CAS_9287	-0.159318809	-0.048404218	0.081070133	-0.268598035	0.226618435	-0.075391225	-0.181776591	0.175006969	-0.036209401	0.101801152	0.006605165	0.06095138	-0.136782237	0.019163451	0.105708062	-0.152480425	-0.173544062	-0.048555907	-0.160745359	-0.198151238	-0.048861226	-0.084401723	-0.193701783	-0.065571667	-0.135714115	-0.024834335	0.009171457	-0.064040852	0.048434492	0.034094217	-0.061085877	-0.022760656	0.034432238	-0.072794904	0.13676039	-0.082163305	0.26555117	0.046010499	-0.000365833	0.376040573	0.031102218	-0.039919564	0.498625754	-0.000477374	-0.054326135	0.131638329	0.026126322	0.04067343	0.109683726
CAS_9288	-0.152861825	-0.074623848	0.060975362	-0.275485525	0.209908061	-0.074993651	-0.195029556	0.157026911	-0.037040787	0.082987581	0.045105144	0.078992447	-0.150920126	0.01365546	0.100788219	-0.126123687	-0.162465417	-0.057433742	-0.134054326	-0.187842461	-0.059076944	-0.047733301	-0.199923224	-0.054936517	-0.14230472	-0.02963172	-0.011492828	-0.089216868	0.069355502	0.030354835	-0.076029907	-0.00841494	0.04102308	-0.051366747	0.161686199	-0.058300378	0.282459075	0.012978948	-0.005249423	0.375755599	-0.004037354	-0.061902727	0.505899165	-0.036206493	-0.105085054	0.134245225	0.001916146	0.066987639	0.084984076
CMNH_52300	-0.182164235	-0.012790222	0.070971506	-0.255386202	0.164575728	-0.058946083	-0.194112915	0.148447709	-0.024651479	0.097152604	0.014872646	0.035037243	-0.160044099	0.037973769	0.092228725	-0.147577459	-0.166339879	-0.058436231	-0.162878486	-0.18879704	-0.069981479	-0.091109985	-0.219977384	-0.052436175	-0.110927076	-0.027434171	0.029417829	-0.062203373	0.067283387	0.024778077	-0.056201575	-0.008787667	0.039831292	-0.064412914	0.153242102	-0.044462994	0.263431873	0.053508493	-0.005353082	0.391533673	0.012643909	-0.033142516	0.537843776	-0.022608779	-0.060596564	0.111278236	0.03475881	0.039532187	0.097454478
CMNH_54140	-0.177664624	-0.026119891	0.072080334	-0.26336484	0.152454253	-0.04297884	-0.182457927	0.137909644	0.004822993	0.09073358	0.041181205	-0.030182128	-0.112801576	0.020680715	0.10910627	-0.181011489	-0.190454513	-0.042800279	-0.189111865	-0.215788021	-0.024330557	-0.091634028	-0.209664206	-0.057045332	-0.132080945	-0.024392287	0.038510134	-0.079140512	0.074953474	0.020145659	-0.067193716	-0.009732421	0.024135953	-0.049208721	0.180572778	-0.026417956	0.257738637	0.049029891	-0.002199598	0.383132156	0.022526004	0.012955114	0.566208262	-0.048557115	0.025588082	0.120461066	0.048468114	-0.030428497	0.095438959
CMNH_54141	-0.166593935	-0.047219739	0.083683814	-0.239744935	0.212091801	-0.039522975	-0.175205247	0.156870196	0.000311098	0.081781746	0.018939917	-0.01290281	-0.149118052	0.018650646	0.116865863	-0.149938897	-0.176920718	-0.033341334	-0.146749915	-0.213857203	-0.024393782	-0.052098857	-0.238910209	-0.031987011	-0.142436029	-0.05437591	-0.007860109	-0.126376402	0.098166573	-0.004702043	-0.107745421	0.009642728	0.006253646	-0.018479896	0.171805824	-0.017776971	0.24288983	0.034451993	0.005972647	0.402720734	0.00716868	-0.005375359	0.53163397	-0.011195286	-0.029761799	0.124527653	0.033035534	-0.00826144	0.099270952
FMNH_224934	-0.162196182	-0.091579074	0.072003032	-0.271284502	0.252264609	-0.08981863	-0.201473868	0.160905529	-0.070500281	0.135413726	-0.011416115	0.062645444	-0.130636893	0.026567205	0.109183738	-0.165752775	-0.172431874	-0.042554626	-0.172576095	-0.183343822	-0.053492691	-0.076411343	-0.196401318	-0.053020945	-0.162533376	-0.027309817	0.017217098	-0.05393976	0.041840548	0.040908776	-0.058792621	-0.024488825	0.050535032	-0.028590768	0.181235741	-0.083587563	0.272495495	0.039301677	0.004172648	0.344167541	0.038332608	-0.03186567	0.442373051	0.026819287	-0.064792437	0.157006425	0.014608595	0.035116465	0.12934049
FMNH_224935	-0.190662924	-0.084763899	0.058383665	-0.283673167	0.224286286	-0.095383964	-0.204379865	0.166108799	-0.056552603	0.147605659	-0.018787212	0.055351246	-0.174351663	0.018863766	0.092703163	-0.156364713	-0.156008214	-0.043976108	-0.178782307	-0.158671965	-0.031798265	-0.076688403	-0.196088812	-0.051898233	-0.144660695	-0.017106798	0.025441266	-0.031158874	0.041948803	0.050325946	-0.050470977	-0.035020624	0.045732768	-0.021595076	0.182642415	-0.079987286	0.262843714	0.041969721	-0.000462932	0.350516496	0.039915436	-0.0363733	0.458833305	0.025339649	-0.065554135	0.152324875	0.018472942	0.040557275	0.136272731
FMNH_224936	-0.189533877	-0.046533055	0.079224792	-0.255318802	0.222442889	-0.083768447	-0.181617893	0.161147752	-0.042251513	0.145253498	-0.008938535	0.05036238	-0.150084473	0.032302139	0.095690946	-0.173269433	-0.168096405	-0.039691377	-0.191939624	-0.18146977	-0.034888459	-0.098146644	-0.208706297	-0.055076176	-0.147104987	-0.042573672	-0.008286125	-0.052942117	0.038618838	0.036417029	-0.061444157	-0.041413861	0.044849572	-0.015309221	0.168331691	-0.070206197	0.274195298	0.052878182	0.004847668	0.346041517	0.055814904	-0.028260759	0.462580139	0.039981455	-0.057838789	0.162785943	0.021777883	0.033221788	0.13337792
KU_216097	-0.161644463	-0.07925497	0.074744043	-0.249522564	0.242224367	-0.07195499	-0.20136347	0.170925047	-0.042220941	0.105423122	-0.006682685	0.028014056	-0.133198499	0.042032746	0.090720195	-0.162370414	-0.174230586	-0.031334111	-0.186278114	-0.192518164	-0.018035805	-0.08305291	-0.210225671	-0.048726313	-0.151919047	-0.030332667	0.005419776	-0.067302225	0.057164227	0.027456159	-0.069613108	-0.037204959	0.027522107	-0.004957132	0.168129473	-0.05631642	0.271692846	0.040439413	-0.002582138	0.361089215	0.055932311	-0.018864349	0.479969344	0.043155466	-0.041737924	0.14039224	0.000212309	0.022257327	0.116244861
KU_246967	-0.172236068	-0.026154746	0.070127735	-0.2617897	0.198196457	-0.073908136	-0.210228517	0.177884346	-0.037825741	0.110555837	0.006363125	0.048729138	-0.135923364	0.070177345	0.116175165	-0.132240641	-0.181675719	-0.058247184	-0.155118078	-0.205646209	-0.065816445	-0.062347812	-0.242797435	-0.062901524	-0.155586481	-0.036062932	0.010094697	-0.069992434	0.078725773	0.033404133	-0.07153127	-0.013986429	0.040478836	-0.018217319	0.168178159	-0.052248406	0.277035942	0.009639809	-0.001214324	0.357034307	0.029387803	-0.03391407	0.459608634	0.013802235	-0.070794094	0.132915515	0.008487295	0.038883261	0.103274669
KU_246969	-0.18138098	-0.055080665	0.071246413	-0.25239697	0.230259568	-0.062227148	-0.205058214	0.183074496	-0.036614064	0.125415493	0.022291892	0.059891978	-0.146267467	0.083249428	0.105813493	-0.124446424	-0.185197947	-0.059663128	-0.149892689	-0.220940143	-0.076526808	-0.040783885	-0.24286207	-0.058742693	-0.18333354	-0.034056799	0.002151871	-0.083223105	0.061947484	0.024275315	-0.073233744	-0.015562944	0.054668602	-0.019170434	0.15754256	-0.067456052	0.263803976	0.034834567	0.008491654	0.340186861	0.030410267	-0.049124224	0.427705904	-0.008497934	-0.074617379	0.168262527	0.012472022	0.05216492	0.130281728
KU_250347	-0.155549874	-0.076591255	0.082681504	-0.314965668	0.206785603	-0.093784032	-0.242626605	0.169170247	-0.060687163	0.130175311	-0.030422929	0.029801955	-0.139637932	0.04344459	0.102418574	-0.185062644	-0.162367359	-0.051409408	-0.201397394	-0.180824873	-0.032442563	-0.097655226	-0.188346412	-0.053992818	-0.118005203	-0.009562893	0.035508275	-0.039319538	0.054046266	0.03255626	-0.050017871	-0.01491421	0.042444629	0.028368323	0.159236373	-0.057403114	0.261184479	0.025505312	0.004787702	0.337621161	0.044582038	-0.010787378	0.460685896	0.052389164	-0.033706909	0.156886187	-0.006158372	0.028309013	0.147318843
KU_250348	-0.14629336	-0.064576232	0.083134055	-0.292918429	0.225494743	-0.094819319	-0.222910855	0.169836855	-0.058271823	0.124454399	-0.018035947	0.027149523	-0.104922072	0.053107863	0.100622075	-0.193774477	-0.18598963	-0.042828118	-0.207185901	-0.196973417	-0.038694458	-0.110672501	-0.240279774	-0.063812442	-0.119348586	-0.01562059	0.03220818	-0.0472191	0.05675272	0.020799248	-0.061248104	-0.013973596	0.043007279	0.044980638	0.155198368	-0.033010835	0.261864856	0.03068402	0.014676884	0.347515548	0.063250863	-0.004233137	0.439119592	0.065744937	-0.040570082	0.153746738	-0.006424011	0.022559222	0.122597219
KU_250788	-0.189441722	-0.000900845	0.074044189	-0.295618055	0.195803689	-0.044880984	-0.224086301	0.169038635	-0.026309766	0.136927963	0.024047828	0.070907092	-0.116747035	0.115469005	0.086293094	-0.11578448	-0.167882846	-0.051799483	-0.135250568	-0.228426692	-0.098196015	-0.027168458	-0.270780742	-0.084112171	-0.160655399	-0.032812581	-0.013229497	-0.060118115	0.063048029	0.041551084	-0.066792547	-0.013515547	0.044243181	-0.047148973	0.166687029	-0.06414284	0.253395807	0.035010527	0.007352115	0.332764951	0.008680372	-0.046707264	0.449702832	-0.052933673	-0.073520146	0.154059205	0.037568553	0.06227068	0.111485851
KU_250797	-0.194472598	-0.026618281	0.066961107	-0.26627153	0.183182806	-0.061718918	-0.211438759	0.169360252	-0.031823684	0.11019893	0.03522403	0.065088823	-0.124762354	0.112960618	0.082724706	-0.119429239	-0.171528732	-0.049328859	-0.14211982	-0.229429565	-0.104931482	-0.039334902	-0.260845198	-0.080712105	-0.169018057	-0.030175221	0.018298228	-0.070592305	0.069006186	0.041212137	-0.072800615	-0.006683179	0.041263722	-0.039361402	0.160223574	-0.034039788	0.260816954	0.027913601	-0.000886845	0.33652582	0.017159475	-0.044247605	0.465144795	-0.039588707	-0.086897636	0.148827851	0.038827128	0.055262517	0.130797807
KU_250808	-0.191965555	-0.029700162	0.076383696	-0.274127987	0.188388629	-0.061605645	-0.206329802	0.182307261	-0.032917192	0.137607545	0.010990914	0.077926067	-0.105227292	0.130372643	0.079433466	-0.116802987	-0.171826342	-0.048697889	-0.145963458	-0.243185581	-0.101249239	-0.025826695	-0.255679257	-0.084068399	-0.172152552	-0.032346842	0.015876533	-0.090480077	0.075506605	0.03578761	-0.088093226	-0.008207902	0.045994911	-0.052530411	0.168635648	-0.047214705	0.269368979	0.02206086	0.008246752	0.332493508	0.01168113	-0.044702135	0.434588991	-0.02185143	-0.08283044	0.160984012	0.019302415	0.060879359	0.129275215
KU_251847	-0.174463495	-0.112137364	0.026420061	-0.248716011	0.234531584	-0.087822992	-0.190218384	0.210891736	-0.064968582	0.104518587	-0.002366113	0.09138306	-0.078555805	0.119043607	0.079545792	-0.125397748	-0.202525143	-0.066843312	-0.153241144	-0.217653497	-0.057406562	-0.036883693	-0.244680617	-0.058003208	-0.148600897	-0.039453136	0.023674338	-0.073269554	0.070112664	0.064222437	-0.082503553	-0.023258119	0.068585379	-0.050723313	0.214813655	-0.055840653	0.273167983	0.019430252	0.004027977	0.355660399	0.021632246	-0.051278507	0.423460078	0.025903826	-0.100069204	0.126288899	-0.012063781	0.055997055	0.081691409
KU_251852	-0.166070473	-0.091522757	0.044548206	-0.264592309	0.219765173	-0.081834085	-0.204313491	0.181110543	-0.058153346	0.091471004	0.000613383	0.075441685	-0.072182489	0.079678302	0.108926645	-0.129250573	-0.184104627	-0.058280958	-0.158112188	-0.194763334	-0.048863633	-0.036363308	-0.220074211	-0.05157288	-0.152161686	-0.02498476	-0.00480055	-0.078356894	0.067504602	0.0537013	-0.082880389	-0.010437363	0.048303956	-0.054460141	0.204575992	-0.061266576	0.262909083	0.021830793	0.002759332	0.365921947	0.017599444	-0.042500862	0.46939554	0.013409378	-0.087145411	0.125516351	-0.008970179	0.051495007	0.09741744
KU_251867	-0.181457456	-0.072823977	0.038730853	-0.278771893	0.209545496	-0.09012785	-0.195249479	0.181992222	-0.044870264	0.094895486	0.001703231	0.075011525	-0.100606697	0.097084143	0.076472046	-0.135128175	-0.188752708	-0.058610386	-0.167177414	-0.203884065	-0.04457654	-0.04893964	-0.213368229	-0.0714493	-0.153086733	-0.035789377	0.028864293	-0.069042764	0.055172334	0.057265117	-0.071703562	-0.014656994	0.063714882	-0.037038858	0.200437514	-0.05855865	0.286324179	0.023831591	0.001652435	0.36275951	0.024387713	-0.036074581	0.438577964	0.020780065	-0.082238945	0.143264582	-0.002319628	0.046330294	0.110323308
KU_253043	-0.166853059	-0.084662235	0.075913879	-0.263085877	0.242991737	-0.081142167	-0.214266224	0.167610883	-0.047721595	0.127992931	-0.009626578	0.036901421	-0.122714824	0.033128295	0.098051292	-0.169456898	-0.174450223	-0.037744461	-0.178457901	-0.189775056	-0.03332919	-0.072474933	-0.218017173	-0.051775921	-0.162280595	-0.033174637	0.00109186	-0.052761137	0.0604303	0.032577105	-0.068873614	-0.02098255	0.035787555	-0.011131954	0.173913069	-0.065453333	0.256391928	0.027192912	0.000962306	0.342253656	0.047342712	-0.012481311	0.456840437	0.029718282	-0.05825936	0.156753387	0.00548273	0.028180969	0.145248713
KU_253064	-0.160402799	-0.095329532	0.063505785	-0.26893215	0.248646178	-0.07146237	-0.217795856	0.176829611	-0.052777603	0.137244513	0.004993972	0.076546911	-0.146991188	0.045472752	0.105126007	-0.145817539	-0.177229902	-0.043895407	-0.163696157	-0.197353655	-0.040802167	-0.064466814	-0.203043805	-0.060838696	-0.139730157	-0.049120649	-0.015549917	-0.070338154	0.06694512	0.033974979	-0.063946698	-0.032108325	0.044061268	-0.034821036	0.179981131	-0.081168572	0.263346972	0.034765858	0.00712969	0.340885789	0.014694008	-0.030170952	0.437657079	-0.005065572	-0.0769029	0.160936463	0.038586876	0.04925336	0.12975439
KU_257756	-0.152542315	-0.093772899	-0.062436388	-0.344378121	0.280013194	0.060863105	-0.283581808	0.236816651	0.044378868	0.138865559	0.022879923	-0.059509234	-0.140401518	0.056436951	-0.079705066	-0.154373432	-0.224523462	0.06628493	-0.180211625	-0.242579904	0.051896124	-0.073234733	-0.271153596	0.056036865	-0.151033893	-0.054279383	-0.025265453	-0.060963913	0.097120656	-0.035537565	-0.066096358	-0.006406441	-0.055644898	0.047128898	0.182702624	0.068397461	0.270338635	0.020595848	0.00490295	0.353186108	0.018050922	0.018775265	0.451096302	0.003805885	0.082535046	0.178697867	0.009809194	-0.034021774	0.142210624
KU_257780	-0.185173418	-0.055455305	0.04469411	-0.272378305	0.185420469	-0.063102753	-0.220955094	0.14963479	-0.030627306	0.097421207	0.02771098	0.052480675	-0.151196882	0.05304761	0.086298372	-0.139186109	-0.155574631	-0.054899385	-0.147345428	-0.168592093	-0.051573529	-0.067658436	-0.210768007	-0.057236541	-0.137555626	-0.030226978	0.034725943	-0.074155955	0.056495347	0.037511453	-0.065739944	-0.015573171	0.041841533	-0.053836427	0.139494052	-0.034252227	0.262697745	0.042071162	-0.019437868	0.37787905	0.018809638	-0.042320336	0.537354223	-0.051226129	-0.049743706	0.129379693	0.037882185	0.031122379	0.097557226
KU_259853	-0.158672386	-0.1055946	0.036112452	-0.275189892	0.209468888	-0.078937483	-0.188745792	0.172612924	-0.059924421	0.101744163	0.009572755	0.088818713	-0.079870081	0.101866954	0.101062198	-0.1424872	-0.181181749	-0.060919515	-0.160606476	-0.21157833	-0.065055167	-0.03213077	-0.228228564	-0.07189457	-0.157390147	-0.006874184	0.013567778	-0.077975305	0.065279799	0.067121449	-0.081955279	-0.00588159	0.061609382	-0.036587555	0.184600473	-0.073322052	0.274200955	0.022759443	0.016185397	0.362876122	0.015616995	-0.040494691	0.451463686	0.005707548	-0.101054528	0.132376539	0.003348989	0.055019101	0.08265901
KU_259854	-0.178198114	-0.095709979	0.049815808	-0.236782851	0.216992376	-0.058292231	-0.176729503	0.17443239	-0.039389866	0.102537926	0.023567308	0.069647152	-0.065454911	0.082259932	0.095095736	-0.168659909	-0.186882222	-0.03750463	-0.185697025	-0.228843463	-0.045112899	-0.066049847	-0.242488762	-0.065356444	-0.173363435	-0.031187334	-0.011092231	-0.078945404	0.060680713	0.033314795	-0.084799329	-0.012727499	0.040122463	-0.004570343	0.172586794	-0.061061599	0.277756517	0.020267114	0.007123695	0.36407765	0.045181051	-0.030821643	0.453922612	0.043589052	-0.065126944	0.136886353	0.014122633	0.041416063	0.105222449
KU_259855	-0.161194397	-0.099655211	0.029306724	-0.259181291	0.231248483	-0.063709419	-0.183397378	0.19321685	-0.035304328	0.098447444	0.015598595	0.081713055	-0.08431109	0.082654276	0.093805586	-0.126348995	-0.196753305	-0.053478326	-0.153900887	-0.231974501	-0.05078001	-0.021640522	-0.261026744	-0.051174152	-0.168226922	0.015850737	-0.012067372	-0.082417292	0.055242935	0.048063545	-0.085399554	-0.013799116	0.04643606	-0.041597685	0.204123805	-0.0662154	0.255970833	0.01419706	0.005580887	0.347406239	0.009920487	-0.04204384	0.457095915	0.008302651	-0.086990471	0.134758083	0.017823098	0.061175796	0.08842027
KU_259999	-0.142207324	-0.029355281	0.093503868	-0.323130175	0.219754274	-0.059949465	-0.261918722	0.174020876	-0.032126121	0.087132168	0.066854384	0.06691671	-0.13341032	0.017947426	0.118463497	-0.106627745	-0.190994573	-0.071875258	-0.105686015	-0.194896694	-0.083724975	0.003451068	-0.251359506	-0.061338393	-0.173434734	0.037857559	-0.016795441	-0.090613477	0.07942377	0.030913222	-0.077192223	-0.015458018	0.032836943	-0.006607293	0.150128259	-0.064253759	0.246724576	-0.001166019	0.002031812	0.336842672	-0.021312395	-0.054497753	0.467290561	-0.049888977	-0.077297511	0.15587374	-0.020868654	0.061419553	0.113425104
KU_317219	-0.163800251	-0.084909558	0.054480872	-0.277464884	0.188205748	-0.091591363	-0.229590112	0.185938717	-0.055894517	0.141488255	0.054691859	0.103120242	-0.081626053	0.103079028	0.119012427	-0.137028744	-0.201109377	-0.063206911	-0.162261741	-0.25932273	-0.093539216	-0.045475068	-0.287653202	-0.106920656	-0.149344104	-0.000104013	-0.000473421	-0.066638794	0.090508042	0.061251584	-0.07501417	0.019230546	0.060925397	0.005363123	0.198729028	-0.042651954	0.263123596	0.007723953	0.002877592	0.321259076	-0.007186077	-0.041625912	0.375807676	-0.008484032	-0.095022557	0.171441382	0.015801843	0.06430426	0.095895473
KU_317221	-0.171210821	-0.06310656	0.065132197	-0.286173189	0.186928587	-0.091372797	-0.212722084	0.186691225	-0.033819979	0.138618063	0.038289009	0.094373285	-0.083105953	0.109331381	0.092121623	-0.130320693	-0.184149643	-0.059638116	-0.171447427	-0.255855136	-0.092620055	-0.049455655	-0.277771249	-0.103955757	-0.165334994	-0.016973382	0.021119226	-0.065083301	0.080486772	0.044719023	-0.072733189	0.011143092	0.05461423	0.005423604	0.179248941	-0.051484428	0.264354849	0.015089775	0.013166257	0.321254614	0.01124141	-0.033042756	0.39901351	-0.005239372	-0.097269699	0.169308745	0.014138901	0.062412065	0.103200683
KU_317229	-0.175999249	-0.048148711	0.070746867	-0.278585716	0.218119878	-0.071992271	-0.211444011	0.195710817	-0.037380321	0.133835936	0.03466605	0.089458751	-0.082142193	0.118883489	0.084089865	-0.130481649	-0.205570849	-0.058208195	-0.158065716	-0.286082769	-0.083305422	-0.040835552	-0.287622083	-0.102346832	-0.130850981	-0.022639604	-0.008291137	-0.063255458	0.083825254	0.042251297	-0.064451189	-0.001865935	0.03612255	-0.037592205	0.209219387	-0.050525966	0.261081406	0.007117069	0.01059943	0.312555225	0.000926757	-0.039811282	0.380590872	-0.005790662	-0.091460066	0.172460757	0.017462588	0.073720682	0.104695535
LACM_113841	-0.151290957	-0.047374398	0.069182297	-0.320747473	0.207982957	-0.064439064	-0.244652609	0.170035119	-0.045016648	0.117194113	0.084468148	0.059932977	-0.135483619	0.042979652	0.120837803	-0.12039907	-0.204338039	-0.086530942	-0.134476289	-0.209869922	-0.062691576	-0.012232193	-0.219426649	-0.064945118	-0.173501291	-0.032533788	-0.008612245	-0.094441906	0.087899182	0.025503151	-0.083281245	-0.011035794	0.032059918	0.032681048	0.172287745	-0.034892052	0.270277695	0.002709262	0.013401406	0.340682344	-0.01677436	-0.039381026	0.41109986	-0.05868838	-0.097461626	0.185991661	0.033651938	0.072647229	0.118066391
LACM_135076	-0.167485158	-0.056503475	0.062448213	-0.259767734	0.213422473	-0.068008101	-0.208405304	0.181849376	-0.035922279	0.091621133	0.070943158	0.081268954	-0.130394631	0.104908624	0.113683413	-0.10818515	-0.182559178	-0.055470607	-0.132545337	-0.251351942	-0.089925523	-0.024366081	-0.262688807	-0.090915689	-0.156865017	-0.038284765	-0.010124021	-0.092693419	0.075219043	0.033466475	-0.087361155	-0.018387535	0.043918972	-0.035184733	0.184895412	-0.036677436	0.258014425	0.046489576	0.005220052	0.318703122	-0.001904451	-0.067642929	0.436943747	-0.06626882	-0.092166317	0.167243343	0.034564678	0.070509503	0.13738559
LACM_135079	-0.199959129	-0.022983779	0.078004885	-0.258740637	0.208988067	-0.056522873	-0.197099544	0.186801742	-0.020707201	0.104452784	0.063427285	0.052178563	-0.09338529	0.109016056	0.091788217	-0.118281742	-0.176824166	-0.038251996	-0.147004911	-0.261325237	-0.100033627	-0.032872415	-0.282062442	-0.089150087	-0.167002254	-0.033392041	0.007531379	-0.091076379	0.083867424	0.030015124	-0.08220041	-0.002623773	0.037755948	-0.032457763	0.145709775	-0.041139652	0.244837848	0.011620927	-0.001873487	0.343658579	0.02680598	-0.047666536	0.44581788	-0.009937661	-0.063172638	0.162346398	0.009957949	0.054525579	0.127300197
LACM_61757	-0.171578265	-0.048224337	0.064936169	-0.296214764	0.243493419	-0.048951613	-0.22391717	0.198661907	-0.037234399	0.102611421	0.037344516	0.087115237	-0.113230834	0.068473327	0.119220047	-0.10520305	-0.208022949	-0.065498302	-0.125247334	-0.256014664	-0.072764828	-0.007299035	-0.256473821	-0.06703081	-0.139502213	-0.014274489	-0.017129724	-0.08672884	0.082581091	0.023585256	-0.080167917	0.009737166	0.038902057	-0.000724997	0.177710336	-0.071601736	0.278162169	0.014498992	-0.002140901	0.341081288	-0.003372646	-0.045534569	0.398503346	-0.03001448	-0.086907093	0.143009315	0.021943347	0.074945836	0.095789364
MCZ_111205	-0.170955926	-0.049746284	0.085558009	-0.287453255	0.242773224	-0.065061763	-0.231498334	0.213578718	-0.049978021	0.117904398	-0.007457619	0.023895295	-0.154490403	0.028170209	0.087365676	-0.137019716	-0.205712493	-0.036190569	-0.165996082	-0.223944705	-0.016900435	-0.071285102	-0.243066199	-0.03097026	-0.12607236	-0.019521014	-0.014643169	-0.057865977	0.056728285	0.029397343	-0.054856386	-0.013448728	0.013920869	0.006031331	0.186384036	0.003587304	0.256974817	0.015582181	0.006932544	0.334613364	0.021343963	-0.010771098	0.454615551	0.020069792	-0.038361773	0.139326592	0.008620251	0.012818706	0.110757215
MCZ_111207	-0.127203586	-0.049410639	0.094951762	-0.305638788	0.227084836	-0.067309934	-0.24123187	0.194248865	-0.035959123	0.116239738	0.016369298	0.016718707	-0.132770205	0.036082879	0.097407157	-0.162142171	-0.227687374	-0.050521936	-0.179218804	-0.214101734	-0.045892618	-0.068657243	-0.234645162	-0.074952468	-0.123148685	-0.012409774	0.023380325	-0.053495152	0.087023603	0.034331009	-0.058209755	-0.007280332	0.030988694	0.016841875	0.156501069	-0.057172445	0.241721938	0.025818209	0.012346068	0.333054862	0.024283573	-0.006850413	0.441855198	0.002261766	-0.024991552	0.161502299	0.009959083	0.025942387	0.129573546
MCZ_111209	-0.150074421	-0.029944433	0.102508992	-0.285793114	0.240069756	-0.062944644	-0.239019342	0.207456562	-0.030575149	0.129474335	-0.002426128	-0.008107175	-0.127073381	0.034177088	0.101554489	-0.180117848	-0.217669227	-0.043169059	-0.21008193	-0.248713617	-0.035707929	-0.089334215	-0.259435425	-0.054964156	-0.097765925	-0.010819238	0.027526113	-0.0606254	0.07004161	0.023623618	-0.055491034	-0.00962825	0.021238984	0.050509316	0.150138756	-0.03328308	0.251430148	0.029045336	-0.011783163	0.334632917	0.047040054	0.00897813	0.423182713	0.052087583	0.029916252	0.161195456	0.007085255	-0.02327292	0.128461389
MCZ_120101	-0.134140528	-0.099435912	0.037638039	-0.300676136	0.185068874	-0.058417723	-0.25010796	0.15273598	-0.033264857	0.12515081	0.01543999	0.039772362	-0.140045943	0.02030144	0.092670393	-0.165544852	-0.159334261	-0.044198029	-0.180928928	-0.184879075	-0.047617696	-0.070875135	-0.18454384	-0.02958266	-0.145445765	-0.008824803	0.017615345	-0.071197475	0.074737975	0.023776545	-0.073944128	0.011357235	0.033031633	0.016196487	0.13184616	-0.030928525	0.243860049	0.028764085	-0.004864475	0.354792234	0.037289169	-0.028611262	0.536462697	-0.037711085	-0.036991578	0.152278858	0.030087677	0.029858081	0.104204224
MCZ_125504	-0.186542832	-0.03902244	0.072888566	-0.266164697	0.191703136	-0.066898952	-0.205392637	0.187992964	-0.034670525	0.148059546	0.003206422	0.050242641	-0.110902928	0.092875007	0.088337234	-0.142479991	-0.175133344	-0.036038896	-0.182183155	-0.240199778	-0.074917503	-0.082713812	-0.289487648	-0.085151683	-0.160501248	0.017011677	0.006546396	-0.047760601	0.065123936	0.046396285	-0.052570854	-0.028017433	0.037124697	-0.022816432	0.163280888	-0.047512778	0.242453769	0.044743655	0.00140689	0.331363959	0.037721294	-0.024747261	0.438206959	0.01044864	-0.041655497	0.160806114	0.028710833	0.025010286	0.122526994
MCZ_127121	-0.170945591	-0.05311762	0.057586349	-0.225835127	0.18057148	-0.059633553	-0.187195828	0.166838227	-0.035068012	0.090114219	0.007401307	0.046019035	-0.134403361	0.089738136	0.073052764	-0.144917192	-0.171103319	-0.036048621	-0.170509307	-0.222212572	-0.065525214	-0.071131019	-0.248661435	-0.060138412	-0.175590385	-0.02083859	0.007932657	-0.076843933	0.069780532	0.037573959	-0.090553102	-0.01646195	0.053997687	-0.01667642	0.163825323	-0.023866181	0.26426459	0.031677978	-0.001926662	0.360163965	0.036524298	-0.039603265	0.503348164	0.018274423	-0.070343741	0.145866033	0.000476874	0.035477523	0.105087897
MCZ_127123	-0.154438334	-0.022152232	0.057905566	-0.244062806	0.189377897	-0.040905348	-0.194222887	0.171794512	-0.022053875	0.104711635	0.009216494	0.033709792	-0.10361014	0.087960025	0.078390655	-0.15481628	-0.173690346	-0.028301964	-0.178020405	-0.227224334	-0.07043435	-0.075875724	-0.269379037	-0.067763008	-0.164438415	-0.022500405	-0.000317214	-0.073703607	0.067844577	0.027288687	-0.083617871	-0.014099103	0.036393182	-0.048384258	0.146254588	-0.045125795	0.253027653	0.036163269	0.003420645	0.356027709	0.039749778	-0.033358588	0.499060693	0.007259768	-0.038264203	0.157062592	0.012319712	0.037791493	0.11409872
MCZ_127124	-0.149720902	-0.055118121	0.063677921	-0.255788192	0.18650088	-0.050304124	-0.204038343	0.185660378	-0.024304726	0.112969319	0.030766102	0.040828437	-0.098065599	0.106783975	0.081640671	-0.142559644	-0.178981871	-0.039308779	-0.16858874	-0.236154849	-0.075640995	-0.075746001	-0.274425893	-0.075636332	-0.168289451	-0.014473135	0.002699318	-0.07719336	0.073604165	0.028613515	-0.087705471	-0.011411505	0.039653351	-0.024237058	0.149825404	-0.040198682	0.263905105	0.033503654	8.47E-06	0.346464965	0.028424952	-0.032803256	0.464505748	-0.000746404	-0.047167569	0.15201374	0.014745049	0.043746449	0.1246406
MCZ_127126	-0.178576775	-0.031184825	0.069359357	-0.215720066	0.185144186	-0.056772061	-0.176978826	0.178062217	-0.018162844	0.075405881	0.036503299	0.040781148	-0.107384378	0.080137292	0.090909279	-0.139643251	-0.174946402	-0.020784788	-0.170842105	-0.238803155	-0.069714657	-0.061212714	-0.267861574	-0.069394247	-0.182281044	-0.033155854	0.010830217	-0.087804382	0.079746783	0.02884556	-0.095333692	-0.003629944	0.032496519	-0.020668993	0.150917315	-0.02437091	0.26344999	0.029851455	-0.005258691	0.360942709	0.047814007	-0.032075018	0.509250186	0.015830258	-0.054988743	0.145334273	-0.010049943	0.024112693	0.101416709
MCZ_127127	-0.158415335	-0.039101989	0.067447325	-0.23664884	0.191805546	-0.046988125	-0.186817725	0.176820554	-0.01650287	0.079249285	0.048273945	0.041178466	-0.104946747	0.09223335	0.101549941	-0.132622398	-0.17421581	-0.02373389	-0.140232198	-0.240975905	-0.070663708	-0.037442338	-0.256362135	-0.073425086	-0.187291049	-0.024315629	-0.01339193	-0.108011948	0.079874243	0.025493137	-0.108191521	-0.006162305	0.028297884	-0.024105034	0.15263181	-0.033237058	0.254105585	0.01157796	-0.002231248	0.359896225	0.033132655	-0.047366738	0.511465177	-0.007071226	-0.06037516	0.139391241	-0.005461074	0.043296328	0.107759789
MCZ_139577	-0.173602505	-0.023719665	0.074729511	-0.244755315	0.184219189	-0.074383735	-0.196042652	0.157197325	-0.025928399	0.123470654	0.027277074	0.056489543	-0.143781146	0.062535856	0.115940538	-0.137010318	-0.167493702	-0.036729158	-0.157366582	-0.235745628	-0.100047559	-0.055336601	-0.277851603	-0.084891504	-0.169238816	0.000796484	0.007789806	-0.084271907	0.087013559	0.032764177	-0.076103725	0.004166727	0.050675867	-0.025180885	0.152803738	-0.043555606	0.253611929	0.033647697	-0.004413315	0.357415394	0.023865563	-0.046798442	0.451792874	-0.007707823	-0.067395436	0.164899994	0.018636893	0.0517674	0.123011833
MCZ_139578	-0.173219651	-0.055545271	0.06817939	-0.262113889	0.196514888	-0.086070193	-0.195565973	0.173127618	-0.029565443	0.119393192	0.007875142	0.031622982	-0.1339644	0.056898857	0.110543392	-0.164160676	-0.182793847	-0.052354379	-0.181425356	-0.192018851	-0.044930059	-0.083167249	-0.235272045	-0.065582297	-0.159273973	-0.030213706	0.02672451	-0.076234567	0.087751707	0.035058834	-0.068991312	-0.021615032	0.049734985	-0.01368849	0.162868664	-0.055484684	0.267849117	0.024218937	-0.003005493	0.356648278	0.041093051	-0.017365178	0.446232731	0.033709856	-0.033843089	0.176542026	0.000949388	0.019154693	0.13439543
MCZ_139589	-0.161625091	-0.046202094	0.072241688	-0.252641044	0.193899628	-0.07557925	-0.190882952	0.160100864	-0.020680022	0.125386056	0.031509772	0.041461897	-0.135313598	0.043452258	0.104616013	-0.140168426	-0.171184439	-0.059721492	-0.171140984	-0.197790632	-0.048660837	-0.08101322	-0.236207233	-0.05852959	-0.174846382	-0.029449204	0.003686255	-0.089513191	0.083497372	0.024472515	-0.080312257	-0.01537552	0.03978019	-0.022206967	0.1622348	-0.051324428	0.274228881	0.011772986	-0.001799769	0.365669924	0.037027429	-0.032167262	0.469206004	0.013612781	-0.057992941	0.141737016	0.026967087	0.049839212	0.133231412
MCZ_141423	-0.157476246	-0.110096659	0.059941113	-0.271347916	0.232478758	-0.070619708	-0.203649917	0.189568265	-0.042717802	0.113753375	0.004670373	0.073193429	-0.148056839	0.025588446	0.099812526	-0.147839893	-0.178031737	-0.051818094	-0.153432681	-0.193519881	-0.034543025	-0.055440166	-0.198851302	-0.037222818	-0.154104039	-0.026794452	0.001517322	-0.081924434	0.081776737	0.023557826	-0.077271527	-0.014170487	0.024383949	-0.009392938	0.166208908	-0.066121679	0.25344371	0.03008292	-0.007011923	0.340100107	0.026321939	-0.046133996	0.476066183	0.00018328	-0.068317637	0.161078686	0.02086667	0.052497553	0.123903833
MCZ_141427	-0.202627996	-0.092747359	0.076538357	-0.25564959	0.215195174	-0.080099277	-0.175987765	0.164259987	-0.049285621	0.127150429	0.001050806	0.087596117	-0.160122448	0.020667241	0.082722648	-0.154884756	-0.170068535	-0.056824921	-0.172766329	-0.182715533	-0.033577715	-0.067662538	-0.190589992	-0.039686025	-0.16352013	-0.028842661	0.001295062	-0.070534812	0.070582519	0.023968585	-0.077629155	-0.016264615	0.051191344	-0.00290283	0.176873706	-0.060765266	0.264265495	0.029692953	0.000626818	0.329078949	0.045268281	-0.042487151	0.484664802	0.034197872	-0.081406795	0.17472267	-0.009101627	0.03605516	0.128331002
MCZ_141428	-0.174137555	-0.090823206	0.068274953	-0.258290452	0.220343776	-0.07313551	-0.199401863	0.178015915	-0.047544478	0.122183622	0.007324307	0.079436167	-0.167919905	0.014397567	0.096127788	-0.14680645	-0.172330274	-0.057784665	-0.157297594	-0.19349976	-0.045986328	-0.057123382	-0.208286929	-0.038460431	-0.159010764	-0.016113687	0.002077545	-0.072867185	0.072784392	0.016814823	-0.069879589	-0.01267384	0.031674204	-0.019433707	0.171184458	-0.059521056	0.270894077	0.026985062	-0.006208572	0.347968802	0.031664391	-0.045228241	0.458734213	0.000170392	-0.086430678	0.159915529	0.01867986	0.060806961	0.127927296
MCZ_141430	-0.175830594	-0.074053922	0.055792408	-0.247500849	0.233246136	-0.070218889	-0.185046048	0.186742888	-0.036756686	0.129880765	-0.029020368	0.093136208	-0.159618977	0.029714558	0.078505252	-0.151186053	-0.182835227	-0.056366809	-0.161485554	-0.19435789	-0.044706348	-0.062633664	-0.225070422	-0.019136244	-0.159589112	-0.017836486	-0.01096494	-0.054559578	0.062155831	0.037216093	-0.070779169	-0.025942581	0.04952919	-0.013981316	0.176267204	-0.074305706	0.25765394	0.031643902	-0.005234174	0.349326081	0.049350601	-0.046272847	0.468961865	0.029146463	-0.078009698	0.147546205	0.015313639	0.045301006	0.102697972
MCZ_146726	-0.183945105	-0.030864146	0.080908958	-0.248922474	0.189989401	-0.056962138	-0.190813473	0.180992245	-0.034576523	0.114977826	0.031015168	0.062819901	-0.102438332	0.097806395	0.089298297	-0.135585982	-0.173961541	-0.043344207	-0.163834616	-0.236240542	-0.087421473	-0.058019019	-0.275037757	-0.080477953	-0.177655898	-0.01362143	0.008620689	-0.08068419	0.070906304	0.039690899	-0.085335292	-0.012286252	0.045155385	-0.022292535	0.147482022	-0.049347673	0.259193769	0.037148158	-0.000279085	0.346595158	0.036772643	-0.041489881	0.454862865	0.004373165	-0.060659112	0.161426067	0.017598104	0.041992424	0.121067827
MCZ_151881	-0.156143474	-0.072624391	0.036384568	-0.268797529	0.200139011	-0.067706737	-0.194155334	0.187547382	-0.018020563	0.112216164	0.070498948	0.06583864	-0.093821349	0.122794686	0.109619343	-0.136326202	-0.213339656	-0.056141199	-0.1546271	-0.282994498	-0.088121701	-0.027637632	-0.29097635	-0.083552309	-0.178362589	-0.011720899	-0.011562181	-0.088925866	0.109041185	0.031677298	-0.09113673	0.02218073	0.048981389	0.005903815	0.183401509	-0.032004954	0.257793686	0.007366631	0.010496641	0.327450871	-0.002875222	-0.039928227	0.391068744	0.003730429	-0.086372146	0.186236224	-0.005325723	0.059004537	0.117744693
MCZ_151883	-0.16034982	-0.049137411	0.065878955	-0.272701076	0.199935974	-0.056224969	-0.206899969	0.181412411	-0.026355247	0.111418167	0.088577469	0.081521102	-0.097682359	0.121496639	0.10014827	-0.12364628	-0.231635652	-0.078923122	-0.138945161	-0.271680111	-0.077520648	-0.027698558	-0.267317318	-0.102290561	-0.16988617	-0.027063633	-0.004709281	-0.093908141	0.098922409	0.028074938	-0.090262827	0.001363474	0.030793163	0.014275556	0.184576157	-0.041800299	0.264663127	0.004219092	0.007547614	0.32585461	-0.00828348	-0.041662	0.399916869	-0.02538533	-0.104140891	0.166173544	0.013933522	0.079004087	0.114822894
MCZ_155867	-0.117727863	-0.044653465	0.082872249	-0.314601214	0.207509112	-0.076443496	-0.245234217	0.183618221	-0.037616967	0.122647912	0.065561647	0.077958454	-0.109107074	0.027810807	0.106174652	-0.138002105	-0.180000917	-0.078391408	-0.157223233	-0.209064692	-0.081494749	-0.034115875	-0.222455685	-0.075779451	-0.125099017	-0.007195658	0.012326321	-0.067245304	0.077972342	0.032267004	-0.066177294	0.009434169	0.038595481	-0.092600239	0.16266982	-0.081680623	0.256548256	0.019553923	0.007481627	0.322728725	-0.009330152	-0.030246903	0.454907599	-0.071232218	-0.069492331	0.168683617	0.030850054	0.061335842	0.135773858
MCZ_156967	-0.163377115	-0.043555159	0.056975692	-0.285901304	0.221612289	-0.053380744	-0.205002579	0.158668188	-0.016588965	0.110622191	0.04554355	0.056802101	-0.149954128	0.04828337	0.10538789	-0.116544723	-0.159784257	-0.06575889	-0.127453458	-0.18062732	-0.044565973	-0.035472228	-0.202286755	-0.048421814	-0.139263639	-0.057633994	0.002058538	-0.078667878	0.075198947	0.028770968	-0.062258542	-0.026207526	0.037106087	-0.106242263	0.164903846	-0.062491555	0.253904753	0.0552592	-0.00636588	0.386472903	0.006003011	-0.042427416	0.52679332	-0.087228258	-0.043443979	0.137625635	0.050904439	0.029622048	0.040159439
MCZ_160634	-0.111505989	-0.086343254	0.063821247	-0.333901555	0.204954113	-0.091992295	-0.265930367	0.17165323	-0.061953565	0.123548376	0.007887658	0.068229511	-0.118509387	0.04387134	0.108890438	-0.15731181	-0.156418046	-0.057004262	-0.183475577	-0.184097424	-0.052177292	-0.05833463	-0.204668018	-0.098329963	-0.118120014	-0.008525398	0.023025805	-0.052887436	0.078865306	0.055983052	-0.053207407	-0.001487943	0.046256046	-0.023293111	0.14548825	-0.079740629	0.260567561	0.033687079	0.011854665	0.339620128	0.012526422	-0.034209697	0.450427019	-0.034620917	-0.05902957	0.153472711	0.026133016	0.054469668	0.124755629
MCZ_160635	-0.125207681	-0.071909804	0.06221216	-0.293364459	0.225216034	-0.06103229	-0.237463668	0.170280433	-0.042424937	0.103730738	0.010757366	0.063811729	-0.122552491	0.010872091	0.097923997	-0.151640395	-0.158907298	-0.034474558	-0.17395807	-0.199499948	-0.047596115	-0.062278753	-0.233500766	-0.054622954	-0.111289233	-0.019421135	0.003917893	-0.068747331	0.073511326	0.018802493	-0.075634093	-0.008908762	0.021639381	-0.012777156	0.175092082	-0.061174272	0.24481264	0.036977819	0.005756238	0.354884218	0.017316721	-0.040771592	0.493881456	-0.024577853	-0.051289987	0.131500066	0.035312916	0.049327341	0.100068641
MCZ_160648	-0.134829249	-0.045607053	0.082753658	-0.307734021	0.234025829	-0.072834096	-0.24628238	0.163030706	-0.045262614	0.110327785	-0.026405596	0.00667361	-0.124344137	0.018248727	0.090910525	-0.143014093	-0.122482937	-0.012031065	-0.193636037	-0.159495727	-0.016999312	-0.082145885	-0.192059762	-0.035014492	-0.130816897	-0.043109434	0.021477485	-0.062844644	0.049841423	0.026149506	-0.073833307	-0.041207291	0.02691978	0.003286835	0.179945502	-0.064145826	0.255347043	0.040562953	-0.010744812	0.360152859	0.068416207	-0.007939091	0.523376824	0.015676116	-0.003395825	0.131022309	-0.00959695	0.012257625	0.121646093
MCZ_160653	-0.134208918	0.014366025	0.083732401	-0.326669582	0.183353619	-0.079203178	-0.264836006	0.157037005	-0.046024772	0.121181448	0.00469176	0.05278642	-0.098285649	0.027664445	0.089829932	-0.175374928	-0.174821026	-0.076043322	-0.190545507	-0.180684447	-0.061341333	-0.083984935	-0.201765229	-0.073828887	-0.113272752	-0.015109821	0.042697304	-0.04940819	0.059129648	0.034997615	-0.061524997	-0.017418559	0.040297427	-0.001815946	0.13124855	-0.067274923	0.260623045	0.035068104	0.004534551	0.35638301	0.024270962	-0.036720782	0.480357625	0.008910852	-0.033507878	0.16072595	0.000650057	0.044036896	0.112869061
MCZ_160656	-0.148493181	0.002400549	0.085520125	-0.296496957	0.193104737	-0.081372121	-0.228618484	0.168655519	-0.045822649	0.112721653	0.000899692	0.050862916	-0.138991618	0.040447075	0.080140997	-0.156418324	-0.163014494	-0.049321202	-0.195501693	-0.203645991	-0.062526724	-0.079096131	-0.235287379	-0.069150001	-0.107402616	-0.016894797	0.030825661	-0.038469988	0.048211362	0.03225487	-0.045402658	-0.030874339	0.030339442	-0.027294417	0.175626561	-0.04159533	0.242035562	0.035822893	0.011345268	0.348296635	0.039372896	-0.035155542	0.492627865	-0.002040994	-0.055647176	0.139519529	0.009084436	0.047121923	0.109173985
MCZ_160658	-0.117488577	-0.041917975	0.057424768	-0.328757175	0.174950872	-0.064452483	-0.264111316	0.145388016	-0.025697623	0.095784907	0.057230084	0.061034807	-0.125555173	0.010101806	0.076620102	-0.148563317	-0.158228259	-0.064319086	-0.169978434	-0.171768091	-0.055094915	-0.052187968	-0.192564716	-0.057513481	-0.134752834	-0.020781299	0.011593982	-0.083315793	0.076578509	0.030338381	-0.081948535	-0.004601639	0.028378664	0.008776558	0.140197717	-0.046941065	0.2530883	0.029073903	0.009429329	0.355143295	-0.001822344	-0.040639532	0.528523832	-0.06211085	-0.073971628	0.148152517	0.031492199	0.063319296	0.110841503
MCZ_160659	-0.173950341	-0.040987978	0.073165167	-0.303772208	0.183947965	-0.083847609	-0.233951681	0.170918251	-0.047279902	0.127787299	-0.015938125	0.051523722	-0.161024908	0.026254463	0.083237356	-0.162730111	-0.164251736	-0.061128983	-0.192978255	-0.160537645	-0.041343913	-0.085374886	-0.195637142	-0.021576939	-0.129351694	-0.032429671	0.025866694	-0.046954744	0.037626287	0.037558001	-0.054901938	-0.035714176	0.030729318	0.040055861	0.179403807	-0.032121614	0.250768651	0.025147668	-0.01229737	0.345334961	0.043882845	-0.028716191	0.502727422	0.015375236	-0.043120483	0.140463519	0.014169851	0.026188963	0.12020526
MCZ_178766	-0.16008138	-0.066333663	0.087957486	-0.265221119	0.198821787	-0.077746993	-0.204755527	0.170796694	-0.039332679	0.123999134	0.008056078	0.041763608	-0.134403563	0.0563829	0.112914057	-0.167626665	-0.210239355	-0.066234872	-0.187156016	-0.21724126	-0.056229849	-0.073643742	-0.239568831	-0.067987204	-0.149020264	0.017656337	0.016991123	-0.059067487	0.07805546	0.038500536	-0.067634993	0.009897876	0.052438666	0.028346274	0.156634308	-0.063505228	0.266166524	0.02833171	0.001044192	0.335880825	0.032321266	-0.022769602	0.447739379	0.048982274	-0.050205109	0.155082971	0.001206293	0.035080728	0.108489487
MCZ_178770	-0.160730511	-0.071272331	0.061584977	-0.271069762	0.213966723	-0.067805572	-0.210767519	0.172337508	-0.040473903	0.113054629	0.000862853	0.065974009	-0.135925077	0.046394437	0.106571298	-0.158917729	-0.194023124	-0.053242854	-0.164678982	-0.210409157	-0.052092731	-0.085025485	-0.21818022	-0.061686841	-0.130705042	-0.014922528	0.01371793	-0.060756124	0.074003321	0.025087805	-0.059724886	-0.009173055	0.028903738	-0.021044307	0.162752441	-0.069779025	0.276393775	0.046998888	0.016956434	0.348885911	0.034699935	-0.03592278	0.452195014	-0.004182533	-0.068857221	0.160857571	0.026362766	0.045786	0.108059526
MCZ_183272	-0.17284301	-0.08350357	0.075973064	-0.262969642	0.208082147	-0.062324122	-0.193280939	0.162014246	-0.040155225	0.120886321	-0.016530359	0.051889453	-0.145534928	0.030154531	0.114072092	-0.177972399	-0.166107005	-0.048879193	-0.193541568	-0.188200894	-0.02825319	-0.09693074	-0.217066118	-0.044949708	-0.142512291	-0.007426463	-0.003228657	-0.050778828	0.066900918	0.017736228	-0.057331689	-0.018581219	0.023439755	-0.029762314	0.157538223	-0.075122135	0.274017265	0.03792188	0.002743512	0.359197293	0.041432424	-0.015637566	0.466720067	0.039339298	-0.038014017	0.168199138	0.021028109	0.021453192	0.130423795
MCZ_186217	-0.16449926	-0.025059342	0.09463767	-0.281861847	0.231640663	-0.080335382	-0.230873712	0.187315547	-0.032613781	0.103883614	0.047236067	0.082394595	-0.146255139	0.074267965	0.124323906	-0.105203576	-0.199597561	-0.075183033	-0.097516679	-0.253705132	-0.091508048	-0.013251642	-0.263508001	-0.066026401	-0.155047099	-0.042688923	-0.016089895	-0.085771908	0.099746192	0.027621884	-0.080750746	-0.007720842	0.033402083	-0.012146816	0.208304727	-0.037177134	0.261003766	0.023644954	0.018913953	0.314333731	-0.002420745	-0.040834661	0.40113333	-0.067893885	-0.115198688	0.156140972	0.019274368	0.055722896	0.139690879
MCZ_186656	-0.175102014	-0.01668898	0.085559554	-0.268709193	0.177553233	-0.058923837	-0.205459244	0.177079437	-0.02826887	0.099699305	0.038006942	0.062847155	-0.125876737	0.099981653	0.098319368	-0.126499599	-0.167030185	-0.054743223	-0.159672998	-0.23219881	-0.088824214	-0.038054818	-0.26373991	-0.091725429	-0.160852008	-0.046120448	-0.001508808	-0.077145343	0.071798373	0.036034572	-0.067728446	-0.01758138	0.035972618	-0.024161559	0.158973247	-0.040501302	0.247732875	0.03895952	-0.00212892	0.335462818	0.027235668	-0.043667177	0.479857395	-0.052707824	-0.074369817	0.145591057	0.033358132	0.049693884	0.119683534
MCZ_186657	-0.181832849	-0.029451835	0.061078908	-0.27594748	0.19671361	-0.071711649	-0.22277627	0.184191991	-0.036941166	0.136240498	0.02826734	0.071326088	-0.142829633	0.095412222	0.102174987	-0.133331496	-0.182151716	-0.053585454	-0.164482304	-0.239675005	-0.085620989	-0.046247967	-0.278829574	-0.086331705	-0.15474078	-0.043580461	-0.01007799	-0.044916694	0.076649458	0.052961877	-0.056868529	-0.018089964	0.048208063	-0.023380622	0.187317598	-0.039874483	0.256159458	0.041939998	-0.00025695	0.306029118	0.016917717	-0.038561269	0.415573238	-0.045888371	-0.068908901	0.174610394	0.042226396	0.04200791	0.134825314
MCZ_186696	-0.170485373	-0.02762764	0.046080726	-0.297336131	0.169947599	-0.069290412	-0.240460501	0.143651195	-0.036116795	0.097001901	0.034427604	0.074380052	-0.158214263	0.062636891	0.095366423	-0.117809156	-0.150462792	-0.073798042	-0.125175886	-0.167645724	-0.065736102	-0.03351328	-0.199565167	-0.065005498	-0.126009012	-0.021397525	0.022187056	-0.069334417	0.052203112	0.05980445	-0.055890318	-0.011635843	0.046774215	-0.094720453	0.15421339	-0.034743373	0.273292582	0.036208167	-0.012628149	0.398569622	-0.016025633	-0.04544397	0.532245427	-0.093865255	-0.07874799	0.107976053	0.048140559	0.04021133	0.064249854
MCZ_186700	-0.157107514	-0.058745594	0.061922461	-0.282700806	0.192907207	-0.060211076	-0.229376316	0.161187246	-0.028861634	0.094970212	0.023898747	0.063119806	-0.133284138	0.054657359	0.086653591	-0.136734144	-0.172898226	-0.059448817	-0.14194128	-0.179782605	-0.046334782	-0.064546805	-0.199575706	-0.058737009	-0.128734061	-0.023313053	-0.000446421	-0.069108333	0.051967643	0.033710026	-0.070626797	-0.016902959	0.03909497	-0.051728063	0.148664357	-0.042966302	0.247336157	0.039050497	-0.00123996	0.395226761	0.001213067	-0.040662598	0.529063857	-0.046903084	-0.066114253	0.120923404	0.042840998	0.043522341	0.075946593
MCZ_186701	-0.177638488	-0.064837907	0.0399519	-0.294665748	0.166052209	-0.062271459	-0.229072303	0.144407747	-0.019827785	0.080331066	0.042008539	0.070586099	-0.153823819	0.038055555	0.098022125	-0.107482672	-0.161625001	-0.074073423	-0.122912576	-0.17548799	-0.050893487	-0.032939705	-0.180438373	-0.046156243	-0.158875955	0.00669759	-0.00531945	-0.093986572	0.067184261	0.030493757	-0.084828137	0.000863676	0.037517251	-0.045383642	0.153008233	-0.042787534	0.260984042	0.029281268	0.007954998	0.385297995	-0.002316383	-0.052115318	0.532639294	-0.083885489	-0.108577123	0.142966555	0.026220748	0.060058975	0.10206965
MCZ_186705	-0.145748323	-0.06786575	0.040673772	-0.281796436	0.175794403	-0.062763693	-0.21948952	0.156922361	-0.023827156	0.099482594	0.04628778	0.064073514	-0.138982829	0.060817035	0.084627306	-0.136495564	-0.16752189	-0.067334759	-0.145402037	-0.186835127	-0.04897064	-0.056358726	-0.207199977	-0.053583963	-0.147076625	-0.014482318	0.015381405	-0.086270733	0.075016122	0.041003202	-0.062669373	-0.001173621	0.05078722	-0.032583931	0.143715626	-0.028920873	0.239423856	0.031770886	-0.011579001	0.372860279	0.018503455	-0.04090013	0.568421138	-0.051888393	-0.06483418	0.099759993	0.012817116	0.026060633	0.065777917
MCZ_186707	-0.153531425	-0.052805588	0.058115958	-0.299621633	0.183405688	-0.066311366	-0.244412319	0.153880964	-0.038962247	0.069385758	0.048968431	0.088412615	-0.144363275	0.056208698	0.098440912	-0.102812065	-0.165701293	-0.069051067	-0.115354284	-0.174973047	-0.069496577	-0.02524889	-0.188520922	-0.055734913	-0.138289295	-0.017451385	-0.010110797	-0.093830977	0.077434674	0.044161287	-0.073796162	-0.01067255	0.039055763	-0.043808131	0.140304759	-0.024383269	0.264465934	0.033896036	-0.011430733	0.394626816	-0.0172939	-0.057694466	0.530664114	-0.084706242	-0.105538506	0.113712173	0.030137309	0.059106345	0.074204775
MCZ_189864	-0.187327315	-0.054994409	0.054656092	-0.263101124	0.214007349	-0.079900743	-0.200808599	0.187642809	-0.031470623	0.124247819	0.001447881	0.092800058	-0.159731155	0.065898292	0.104669457	-0.128529686	-0.170541791	-0.065223215	-0.140553154	-0.20855166	-0.076289665	-0.019685849	-0.253172133	-0.04225096	-0.159043233	-0.026560918	-0.015517087	-0.0833461	0.072825522	0.024730864	-0.079461643	-0.026697491	0.051619039	-0.021662053	0.188697625	-0.049989975	0.264301685	0.031758329	-0.007709604	0.329820222	0.022247219	-0.061235367	0.431551537	-0.027159262	-0.096506628	0.167097139	0.033070713	0.058221658	0.127834695
MCZ_189933	-0.139489255	-0.02529294	0.10424195	-0.296161932	0.22739373	-0.083082051	-0.252996432	0.180555376	-0.035118346	0.110580276	0.000872935	0.077869887	-0.128630943	0.043366165	0.10667611	-0.150733946	-0.185479498	-0.062312891	-0.148852307	-0.221407179	-0.074740376	-0.049672447	-0.224280583	-0.037293359	-0.131151401	-0.026178774	-0.02992352	-0.040912872	0.065534139	0.036810156	-0.047852282	-0.010078779	0.034233124	-0.001086772	0.176974621	-0.054517169	0.266156749	0.034056605	0.003270051	0.339889124	0.019941841	-0.044472746	0.456050997	-0.012965258	-0.072922156	0.129936653	0.000792	0.067402729	0.074786859
MCZ_192645	-0.17782399	-0.046491714	0.075182835	-0.278559504	0.220353818	-0.077448572	-0.19644577	0.16623651	-0.036169715	0.104839186	0.023293159	0.101820975	-0.158934631	0.030996927	0.11198889	-0.107791572	-0.184194328	-0.085516506	-0.126495319	-0.194938147	-0.066361579	-0.018084668	-0.215865549	-0.0498392	-0.146848087	-0.019340447	-0.002597193	-0.070068985	0.071661918	0.03590262	-0.070708091	-0.014243259	0.04389138	-0.058557282	0.171863966	-0.059235283	0.273619976	0.065708645	0.017325962	0.361386144	0.011285913	-0.052230645	0.474686614	-0.080661444	-0.113600427	0.146568738	0.04637706	0.051619985	0.052002251
MCZ_193392	-0.166959839	-0.032394256	0.061749579	-0.261583709	0.187757415	-0.051073156	-0.190651965	0.14544602	-0.023832528	0.07386147	0.039904274	0.079136624	-0.14131018	0.025565665	0.108760798	-0.114792149	-0.171063911	-0.067754605	-0.12817287	-0.185565574	-0.061702203	-0.038039612	-0.219992597	-0.062513868	-0.133948854	-0.004154824	0.005845947	-0.094376957	0.067634979	0.02783014	-0.079410386	0.003001019	0.044224507	-0.110079433	0.150682114	-0.058492684	0.275611528	0.029780928	-0.008922737	0.410660364	-0.012016757	-0.051461276	0.539188781	-0.064612873	-0.076548358	0.095018021	0.038999258	0.044011271	0.073292705
MCZ_193393	-0.183530966	-0.024314087	0.079612524	-0.312728366	0.215878403	-0.081928422	-0.225646692	0.17014679	-0.042884605	0.124494394	0.043647737	0.079391643	-0.163967292	0.050779335	0.112848303	-0.097438834	-0.182572947	-0.0810692	-0.10764844	-0.209917707	-0.083751307	-0.021857313	-0.224482178	-0.092337475	-0.103539134	-0.026882396	0.036129683	-0.05661068	0.077740894	0.072021822	-0.029965445	-0.012114675	0.046807964	-0.130558152	0.184500037	-0.064965503	0.244572734	0.024550943	-0.007289955	0.351268306	-0.023130965	-0.0465588	0.476480882	-0.120177286	-0.066358598	0.124671853	0.052540453	0.037425321	0.071138366
MCZ_21850	-0.108032233	0.025298681	0.096780068	-0.289535817	0.21635365	-0.074110847	-0.221849249	0.180823027	-0.041252556	0.133165271	-0.036255548	0.021646409	-0.096487454	0.068093931	0.104154662	-0.173587877	-0.212786768	-0.066254444	-0.195731465	-0.240416742	-0.060412378	-0.104948764	-0.249872822	-0.081719023	-0.138337872	-0.02368871	0.028171307	-0.040908747	0.065462227	0.034786278	-0.051488503	-0.017947936	0.04251564	-0.013336998	0.164162289	-0.068560261	0.264809512	0.055209924	0.018828267	0.345732971	0.064585059	0.006133523	0.425596897	0.025195463	-0.025364811	0.16389928	0.002691262	0.019776244	0.089344135
MCZ_21851	-0.162342416	-0.029099966	0.108867508	-0.247492738	0.19012394	-0.116134893	-0.187520844	0.166886101	-0.067089675	0.127832679	-0.013882225	0.061647372	-0.143959572	0.006101774	0.118395661	-0.191569308	-0.193012277	-0.056955346	-0.19916788	-0.212819241	-0.088298372	-0.100915086	-0.249983609	-0.080265889	-0.13697096	-0.006074595	0.034204218	-0.031170407	0.076918319	0.046613812	-0.04595365	0.011663917	0.057000499	0.023161315	0.180886257	-0.062547693	0.265588117	0.040742861	0.000648822	0.340068793	0.061936857	-0.033076005	0.429123004	0.061661043	-0.078560381	0.151739113	-0.015489972	0.06001694	0.104806275
MCZ_34821	-0.150470839	-0.070664147	0.075833378	-0.279928184	0.223833553	-0.064505232	-0.206907303	0.178339104	-0.032417739	0.118525012	0.037144789	0.053024683	-0.103682854	0.055752724	0.110743787	-0.149404264	-0.190063286	-0.055904342	-0.166386912	-0.217129955	-0.047516651	-0.058143748	-0.238542458	-0.069438104	-0.153651802	-0.009704405	0.008076598	-0.065139594	0.071485057	0.032051614	-0.082443065	-0.00563629	0.03005298	-0.028755626	0.151859867	-0.062732119	0.261594265	0.009274069	-0.013020829	0.351137894	0.013482034	-0.020405625	0.462466504	0.018846368	-0.031556235	0.149788895	0.005074586	0.021544428	0.107941575
MCZ_35970	-0.160503378	-0.042285776	0.070311994	-0.25987339	0.180739785	-0.047735304	-0.194581715	0.167462016	-0.011428628	0.088927338	0.053344449	0.065591373	-0.099653637	0.109026939	0.084027614	-0.129393311	-0.167729109	-0.035466712	-0.143907682	-0.238371253	-0.085679533	-0.030709534	-0.266008386	-0.077804723	-0.174003074	-0.014599928	-0.009935633	-0.100930427	0.079440506	0.013809537	-0.099880512	-0.006898187	0.029188661	-0.037374087	0.157721973	-0.028063216	0.264816475	0.03285968	-0.002419894	0.347165664	0.014045217	-0.054217559	0.49685702	-0.034309654	-0.068247246	0.145566167	0.005355885	0.055314708	0.112117333
MCZ_35972	-0.200605302	-0.042352518	0.066867878	-0.237157357	0.17753688	-0.059067928	-0.188890382	0.165755841	-0.026155728	0.097743106	0.018848002	0.030944346	-0.097768923	0.105416097	0.093478034	-0.147886191	-0.173892015	-0.038938771	-0.186111206	-0.223091954	-0.069103116	-0.060949628	-0.271013091	-0.087079782	-0.158900558	-0.031436221	0.030515408	-0.0794067	0.077331087	0.029920971	-0.094498241	-0.014334346	0.04114086	-0.006320377	0.148429417	-0.039528824	0.259469689	0.036766649	0.005570477	0.348688431	0.029684406	-0.026694728	0.487873108	0.021754005	-0.05995385	0.139895979	0.01493384	0.037182213	0.130874675
MCZ_35976	-0.159930555	-0.035209998	0.059585913	-0.23408542	0.171168889	-0.067141158	-0.177826041	0.178920396	-0.033097707	0.100491994	0.015266369	0.041749001	-0.101987375	0.079527197	0.102135124	-0.159156177	-0.192904566	-0.035176113	-0.181788643	-0.236099954	-0.068316431	-0.080621279	-0.27289532	-0.072992906	-0.1716493	-0.007265392	-0.006953952	-0.074757747	0.07487586	0.032989775	-0.08530295	-0.013925955	0.043984488	-0.026452306	0.179344709	-0.029980144	0.25998343	0.03720428	0.005944687	0.358540054	0.040460099	-0.029382207	0.463276075	0.019793107	-0.06801681	0.159726003	-0.003932449	0.046741164	0.116757265
MCZ_35977	-0.161972184	-0.042264689	0.074141532	-0.255716949	0.186091893	-0.054638872	-0.213319105	0.178022529	-0.026623137	0.097770947	0.042484521	0.057185593	-0.112885459	0.105256393	0.08456049	-0.120504496	-0.170255576	-0.037948056	-0.140114491	-0.233118201	-0.096610845	-0.021369009	-0.258790239	-0.077582948	-0.17314153	-0.019410202	-0.00912304	-0.07883432	0.058546953	0.057643471	-0.092105562	-0.003678687	0.037167251	-0.068174243	0.17031328	-0.040806258	0.260729887	0.015078665	-0.012929777	0.349171075	0.002994782	-0.06125472	0.485896091	-0.044679346	-0.057088991	0.14222102	0.027129556	0.056683709	0.108758744
MCZ_35980	-0.15647159	-0.054110461	0.071179137	-0.234354038	0.195690842	-0.066668196	-0.191406876	0.177815598	-0.041004731	0.096761784	0.016154344	0.045621256	-0.10808903	0.113601336	0.076269824	-0.141923846	-0.173665275	-0.027135645	-0.167502035	-0.232065377	-0.068261923	-0.050121113	-0.269441556	-0.068825756	-0.171009292	-0.010073663	0.022539063	-0.086637458	0.065437395	0.042639071	-0.096343722	-0.017678082	0.045600478	-0.014527983	0.166678769	-0.006833506	0.260719771	0.034015431	-0.001853588	0.354964137	0.034457425	-0.02000194	0.488533097	0.018064837	-0.063280323	0.143363446	0.002105904	0.009142119	0.10805236
MCZ_38408	-0.186444742	-0.052851691	0.069445063	-0.271639972	0.20191178	-0.088375662	-0.216301707	0.18831376	-0.038672856	0.130779466	-0.002906149	0.050865665	-0.157500396	0.059029797	0.099585868	-0.138889954	-0.16350652	-0.045741733	-0.156463089	-0.198368404	-0.060135273	-0.061198468	-0.226868587	-0.064242383	-0.156006047	-0.01963153	0.015040301	-0.064039502	0.070795126	0.03634019	-0.06804137	-0.018367349	0.04828787	-0.020148305	0.149843689	-0.048903308	0.268970127	0.027438117	0.007713002	0.347409991	0.034147479	-0.035154387	0.44664708	0.010064522	-0.07123524	0.175952486	0.005525877	0.042094169	0.121507123
MCZ_39692	-0.127919743	-0.064940038	0.095121568	-0.262977406	0.204955188	-0.063977989	-0.201056233	0.162793735	-0.028526486	0.103113183	0.038092363	0.032491423	-0.119170322	0.0283446	0.129271621	-0.147325953	-0.154746113	-0.041275819	-0.14980243	-0.217106369	-0.042689547	-0.047406123	-0.215883442	-0.065488733	-0.141358283	-0.045898437	0.001548127	-0.123212409	0.087702728	0.000526064	-0.111470788	0.000536098	0.023178751	-0.029625	0.182452966	-0.043916157	0.263878248	0.021751188	-0.002424892	0.373238182	-0.001445067	-0.028611031	0.501474457	-0.013953545	-0.038121252	0.139924825	0.008819993	0.024363549	0.107659381
MCZ_42489	-0.172340945	-0.084859284	0.086528209	-0.213276019	0.241939491	-0.06541452	-0.161494415	0.178459331	-0.04340516	0.124299215	-0.023117888	0.012354885	-0.139717938	0.050645992	0.098507125	-0.183304461	-0.199775483	-0.043494701	-0.204856741	-0.219976755	-0.040555835	-0.125146455	-0.253616226	-0.036525117	-0.134193108	-0.023943937	0.030431994	-0.045503438	0.062513147	0.023513125	-0.056001844	-0.023718168	0.036363796	-0.022033344	0.175965526	-0.064028565	0.273844958	0.062743545	0.001524452	0.356247415	0.075996492	-0.006800262	0.453710047	0.068463213	-0.015499356	0.146334993	-0.006097086	-0.002189767	0.098932106
MCZ_42562	-0.140450468	-0.032668823	0.071719418	-0.274272458	0.223525802	-0.059402518	-0.224821302	0.188275039	-0.024106388	0.111589085	-0.011228777	-0.00043733	-0.133917831	0.017980723	0.077555884	-0.17556358	-0.197894946	-0.038256286	-0.195590782	-0.20264656	-0.019316278	-0.088913614	-0.223962984	-0.029805293	-0.119524349	-0.043711163	0.02583423	-0.06087789	0.064273012	0.003751587	-0.067098143	-0.020456166	0.0254626	0.01331886	0.180593402	-0.029733977	0.252086898	0.036441711	0.002170271	0.344073454	0.061901801	-0.002335166	0.502470027	0.021332335	-0.005320329	0.142790934	-0.001025825	-0.003595587	0.111038373
MCZ_52001	-0.161921672	-0.055225433	0.085429795	-0.272307984	0.228798299	-0.05797956	-0.20512165	0.169086128	-0.027825782	0.097615306	0.007070515	0.036520888	-0.157586094	0.03123456	0.113647772	-0.142669066	-0.185484994	-0.059507799	-0.159261471	-0.193631893	-0.02418108	-0.052912374	-0.215838405	-0.055520944	-0.137115779	-0.004679158	0.020966717	-0.066301925	0.064943623	0.013053515	-0.047530132	-0.014988418	0.014762453	-0.065036268	0.145619611	-0.054685646	0.26083938	0.038934457	-0.000278953	0.371593807	0.025306691	-0.020968692	0.513977662	-0.016660319	-0.03454997	0.129900127	0.020235639	0.031973884	0.070901532
MCZ_57898	-0.168707591	-0.054552035	0.065239709	-0.261231445	0.1891847	-0.060314802	-0.214058006	0.1773439	-0.025479581	0.087520901	0.043871767	0.066683045	-0.132308338	0.110111293	0.097309257	-0.122440364	-0.172840834	-0.035667454	-0.138628419	-0.235716803	-0.086745709	-0.018531035	-0.258459782	-0.085766424	-0.171837908	-0.012069725	-0.00772429	-0.089153524	0.070522133	0.038153046	-0.09260761	-0.009220206	0.038105597	-0.015161326	0.163960207	-0.039865768	0.262311332	0.01812428	0.00056586	0.357412933	0.008239325	-0.053766488	0.453144804	-0.034049691	-0.086871085	0.154457074	0.019400611	0.06658537	0.11426768
MCZ_59237	-0.142842597	-0.064317491	0.081079753	-0.311277099	0.225975855	-0.085493567	-0.245918362	0.18915692	-0.044532689	0.105945435	-0.003221514	0.046994228	-0.127181693	0.015729987	0.101676288	-0.135452746	-0.146904586	-0.066687248	-0.15417276	-0.152851942	-0.045020534	-0.024635485	-0.176576825	-0.043261327	-0.148002577	-0.050908354	0.029259296	-0.075415704	0.056651084	0.02252626	-0.072742992	-0.025018859	0.048141542	-0.05184333	0.145602354	-0.067554853	0.26374394	0.0395798	0.0075199	0.374005488	0.015238023	-0.034168464	0.488371454	-0.044414052	-0.053030752	0.148300701	0.033890407	0.036520216	0.1104879
MCZ_59240	-0.15207033	-0.099006644	0.060397174	-0.274269512	0.21707394	-0.07520959	-0.20147107	0.174532421	-0.038284919	0.09431345	0.011642722	0.050827955	-0.147066222	-0.002334476	0.104119279	-0.150865524	-0.167555774	-0.044932319	-0.162637972	-0.180893016	-0.019295027	-0.063816222	-0.181414722	-0.047060071	-0.152593325	-0.010201755	0.009888459	-0.080767248	0.058711095	0.020922566	-0.079839004	-0.008206465	0.035137886	-0.041147345	0.162105266	-0.058863239	0.261408414	0.03156014	0.004205189	0.379878402	0.024129051	-0.032000641	0.499338977	-0.006273359	-0.054142558	0.157025341	0.018604354	0.023113087	0.117714932
MCZ_59242	-0.153131848	-0.039160812	0.091012201	-0.307423819	0.203311158	-0.084031082	-0.230607786	0.158757212	-0.045327096	0.08590939	0.010614482	0.046425698	-0.138296434	-0.002436988	0.122067528	-0.123783009	-0.15489241	-0.063621307	-0.140551406	-0.159381345	-0.050324441	-0.052819953	-0.16949461	-0.060402912	-0.144008398	-0.031703391	0.017624699	-0.07682523	0.063318374	0.031469765	-0.072216095	-0.012644351	0.043913692	-0.059785512	0.1592204	-0.072884168	0.263709497	0.023083808	0.007776839	0.381900359	0.010567489	-0.029111884	0.506527436	-0.044081379	-0.064591805	0.159569945	0.030066554	0.033072737	0.103674787
MCZ_59324	-0.15180046	-0.056936335	0.068784712	-0.236326873	0.231234356	-0.067826907	-0.196644694	0.193783143	-0.034365414	0.094938539	0.028303666	0.051615623	-0.118023481	0.077200964	0.120503835	-0.135436727	-0.207204125	-0.060763947	-0.147867525	-0.236998207	-0.061079725	-0.056034035	-0.266779606	-0.062578419	-0.161401234	-0.047778392	-0.00656389	-0.081389661	0.076960266	0.033095709	-0.079303524	-0.009046252	0.036572884	-0.006658944	0.16677355	-0.04199687	0.27430084	0.036094507	0.005994767	0.356262786	0.031854535	-0.037183729	0.444665198	-0.013403265	-0.079538246	0.118426544	0.024846209	0.044811836	0.08573956
MCZ_60876	-0.16569946	-0.106983094	0.082352908	-0.26990572	0.217559836	-0.07267662	-0.201639612	0.170271556	-0.05285451	0.127677462	-0.002740398	0.048668287	-0.151859544	0.003747313	0.12156282	-0.161560155	-0.178969415	-0.05258923	-0.176052881	-0.170046845	-0.032604239	-0.070367265	-0.196198422	-0.031608917	-0.158031364	-0.016802178	-0.00474663	-0.070552352	0.08395409	0.014334422	-0.084173697	-0.012629139	0.027370849	0.003765213	0.163902539	-0.062089944	0.282316223	0.040428036	-0.003001183	0.360815442	0.033384648	-0.034988535	0.449406239	0.022525332	-0.051231791	0.16704193	0.006404622	0.037282551	0.132134549
MCZ_60902	-0.152857579	-0.085454368	0.079920636	-0.251000726	0.246765577	-0.076304723	-0.189212915	0.19087142	-0.050694013	0.137839287	-0.025975221	0.038225244	-0.146931593	0.020594152	0.10610576	-0.180580851	-0.172875536	-0.034122232	-0.196945497	-0.186157144	-0.020780711	-0.09641763	-0.230148765	-0.039742841	-0.158291928	-0.034597598	0.023529752	-0.05356536	0.056650454	0.022210616	-0.070950779	-0.034231956	0.019726215	-0.001496997	0.169380009	-0.074915389	0.264676644	0.040539026	-0.005433955	0.342146729	0.059819767	-0.016727478	0.445761662	0.069667172	-0.021286795	0.17308392	0.002053631	0.020515128	0.139707546
MCZ_60903	-0.160730275	-0.11110842	0.076306062	-0.253395828	0.232261101	-0.075617177	-0.186901572	0.179764195	-0.05357804	0.131856842	0.001606702	0.039905409	-0.125808505	0.038085019	0.108005798	-0.188682826	-0.177559061	-0.037130967	-0.19927092	-0.187885694	-0.026692174	-0.081066508	-0.219677182	-0.048661036	-0.16426337	-0.035083239	0.0067913	-0.056914478	0.075576788	0.023091956	-0.078025282	-0.031078183	0.030291782	-0.001267344	0.163250336	-0.059222082	0.272891777	0.037362701	-0.004992725	0.347272478	0.04993068	-0.019231418	0.444634297	0.053541836	-0.031972973	0.163828091	0.005260879	0.017499191	0.139545854
MCZ_61974	-0.149633747	-0.083114759	0.069758112	-0.278991956	0.212100037	-0.068594114	-0.196795422	0.142603675	-0.031985085	0.09975794	0.021342306	0.066043234	-0.105928624	0.024544707	0.100442358	-0.164248774	-0.173604499	-0.047067098	-0.176575877	-0.183163489	-0.034837372	-0.082253245	-0.215444008	-0.057266519	-0.16712598	-0.009079838	-0.012955917	-0.064730122	0.05990928	0.017726034	-0.074346793	-0.012434354	0.03249132	-0.009926407	0.152745934	-0.053722813	0.274364975	0.034541151	-0.006831113	0.368112657	0.036402134	-0.046415486	0.496574361	0.000418825	-0.045165764	0.142894332	0.023402024	0.048941981	0.100122317
MCZ_61989	-0.164794404	-0.064229494	0.074292379	-0.288753912	0.215210752	-0.084679191	-0.198797648	0.147504952	-0.024800254	0.116000839	-0.009532238	0.043095436	-0.124352602	0.05000226	0.098451542	-0.170368782	-0.158678506	-0.037161903	-0.188566008	-0.181266223	-0.025634727	-0.097807396	-0.216488305	-0.074924639	-0.148856699	-0.022223748	0.014297936	-0.05168218	0.051343752	0.030878479	-0.053880169	-0.028008261	0.028001866	-0.019221827	0.154682426	-0.067824146	0.268765497	0.039733921	-0.005004781	0.370331901	0.051794012	-0.027915237	0.476773327	0.021240421	-0.02512468	0.14648414	0.015149415	0.029927961	0.11893085
MCZ_63663	-0.13514497	-0.068734789	0.092465601	-0.255060625	0.233743085	-0.078955351	-0.20894306	0.203214178	-0.054251307	0.12865525	0.009144482	0.060714324	-0.144632233	0.025660757	0.109887802	-0.158080353	-0.206555475	-0.054806902	-0.164719923	-0.240644825	-0.0684681	-0.054510033	-0.248790005	-0.063103254	-0.157135344	-0.009184005	0.004169803	-0.044013219	0.087498956	0.044746904	-0.068790334	-0.01329239	0.037124989	0.000368792	0.181780646	-0.069294924	0.263018131	0.033455769	0.008713628	0.339642546	0.035978709	-0.023994614	0.404695746	0.004553208	-0.077702344	0.156218637	0.030080141	0.051081854	0.102687726
MCZ_63671	-0.126588456	-0.04419704	0.092081345	-0.264445797	0.233183873	-0.086797217	-0.221168636	0.200947582	-0.046377297	0.095491429	0.024588815	0.059769133	-0.127458575	0.036260558	0.105520679	-0.138289591	-0.220166145	-0.059023975	-0.152905745	-0.233317115	-0.057408929	-0.036337993	-0.270343956	-0.068182399	-0.136802155	-0.020875248	-0.006112025	-0.06138545	0.091636062	0.035596514	-0.075392263	-0.007053494	0.032825039	-0.006097191	0.218830438	-0.025757331	0.249166142	0.023325722	-0.00230576	0.325590688	0.012512543	-0.045610869	0.435705122	-0.009544451	-0.066738864	0.135622504	0.031500339	0.052756719	0.104888085
MCZ_63686	-0.162331127	-0.07948171	0.057192623	-0.266770475	0.226854377	-0.109849234	-0.219004937	0.198571363	-0.067161907	0.163156961	-0.026801009	0.091768316	-0.158643252	0.054721051	0.100644803	-0.153352044	-0.199070423	-0.070565355	-0.176274752	-0.200713898	-0.064658986	-0.063477524	-0.255597857	-0.07263876	-0.13763271	-0.002560863	0.025504512	-0.01672992	0.064063652	0.070273142	-0.039150366	-0.019755197	0.068336272	-0.015318539	0.190705496	-0.066424504	0.257335094	0.033007814	-0.017508663	0.322838865	0.031807884	-0.045709543	0.401960037	0.018461866	-0.074615355	0.157348163	0.051107609	0.051394065	0.08538623
MCZ_63699	-0.153970345	-0.025233725	0.089750081	-0.268221582	0.212567335	-0.08796403	-0.196310634	0.164701766	-0.029055291	0.141643282	-0.011441514	0.054855917	-0.150991265	0.055466556	0.106976477	-0.165133398	-0.211326887	-0.074594429	-0.186688403	-0.213277066	-0.057248713	-0.07357071	-0.247673726	-0.06845364	-0.16342342	-0.009082839	0.025112118	-0.046488104	0.077803163	0.041585508	-0.058852581	-0.008044863	0.047666675	0.013553021	0.170743947	-0.075905887	0.273803919	0.03768386	0.002302546	0.344279768	0.045990611	-0.019763918	0.419216101	0.040519916	-0.054610604	0.149798268	-0.002324468	0.030092133	0.102714682
MCZ_73928	-0.166212524	-0.076362732	0.053700475	-0.306666339	0.209457279	-0.065592111	-0.250888746	0.175599348	-0.038374371	0.127605972	9.18E-05	0.01483967	-0.129326111	0.036407573	0.092175907	-0.172076768	-0.179445865	-0.042976314	-0.196065352	-0.181857116	-0.025758115	-0.08905974	-0.226061061	-0.043375966	-0.121509815	-0.019576899	0.026129507	-0.035909286	0.059233779	0.024349332	-0.057623799	-0.021132586	0.032714459	0.027940296	0.171519824	-0.046179744	0.246664571	0.044585119	0.007806475	0.330003553	0.033563942	-0.007684782	0.478167576	0.008286028	-0.01897332	0.150693549	0.008446357	0.01597081	0.139949848
MCZ_73929	-0.145699028	-0.057570695	0.06646792	-0.302179661	0.209890849	-0.065623206	-0.244889503	0.180123912	-0.040250731	0.111463555	-0.004909894	-0.003473867	-0.135783402	0.019270222	0.08033514	-0.176359523	-0.165302706	-0.039222394	-0.196311038	-0.179741587	-0.020481837	-0.080666343	-0.208771401	-0.039305265	-0.133242988	-0.022680629	0.034416908	-0.034928822	0.055036603	0.031010732	-0.052326232	-0.014908539	0.03791833	0.021374616	0.156856663	-0.042087423	0.247330681	0.032727256	0.002349217	0.356394917	0.040033853	-0.000256957	0.517667716	0.021182478	-0.006906059	0.132064753	0.007772701	-0.010031043	0.088070431
MCZ_73930	-0.173160169	-0.006361579	0.082416464	-0.320057177	0.216183897	-0.076907781	-0.267174658	0.183012559	-0.040968966	0.114644628	0.016742237	0.051009428	-0.165024995	0.045820813	0.077104035	-0.133962359	-0.167858033	-0.050795708	-0.159059726	-0.192843257	-0.063972005	-0.052432768	-0.223463372	-0.073696232	-0.117904916	-0.03789272	0.022882512	-0.053885303	0.050932862	0.037003528	-0.052193134	-0.027042025	0.038364544	0.033359424	0.128746042	-0.038576482	0.242399189	0.038007911	0.016255717	0.333281573	0.011318536	-0.038053461	0.475022786	-0.022195872	-0.074714295	0.144933912	0.019584633	0.05084456	0.124916739
MCZ_74028	-0.147527525	-0.06277491	0.079581982	-0.275711051	0.231457844	-0.078152638	-0.228406889	0.173887453	-0.05066076	0.128264764	0.014416779	0.061192947	-0.119808336	0.0413144	0.114850613	-0.146858727	-0.208049637	-0.073459112	-0.172603437	-0.200887794	-0.055022971	-0.065599079	-0.224604937	-0.057449969	-0.160980629	-0.017841687	0.007754246	-0.056000899	0.078281662	0.033299069	-0.061651682	-0.004356151	0.040999662	0.001268477	0.159384429	-0.068526066	0.270614924	0.021654229	0.004027136	0.341595995	0.02112091	-0.027489774	0.432293703	0.026249962	-0.067762074	0.157696522	0.012250179	0.053932403	0.103258395
MCZ_74029	-0.16515376	-0.069993774	0.085386949	-0.266461727	0.204295322	-0.08977619	-0.206857675	0.178330915	-0.050050212	0.118324159	0.002209797	0.054206924	-0.148349016	0.036698526	0.113054414	-0.156074622	-0.195999095	-0.061018891	-0.173994914	-0.208798552	-0.058661762	-0.049670533	-0.233202655	-0.054626191	-0.164637725	0.009153572	0.016400439	-0.05352575	0.086401811	0.036016486	-0.063751616	0.005337531	0.047036163	0.00639695	0.171772816	-0.04228649	0.280636643	0.020086254	0.002237343	0.357904299	0.034608837	-0.030197349	0.423757726	0.031386253	-0.064422468	0.15998858	0.001358199	0.037481569	0.102357591
MCZ_74030	-0.142458889	-0.038317093	0.09318326	-0.280011453	0.205148419	-0.085644204	-0.189223444	0.171386241	-0.050574181	0.130730788	0.003027623	0.067896999	-0.127494972	0.030863019	0.119460342	-0.161655704	-0.202286169	-0.084315268	-0.18442158	-0.193261453	-0.064847897	-0.081583137	-0.224312885	-0.055054956	-0.151830587	-0.010312481	0.020312432	-0.054118831	0.071624091	0.034416755	-0.063853384	-0.003215089	0.047278124	-0.021368635	0.163466015	-0.077968775	0.278268735	0.030791485	-0.001289273	0.355118788	0.025382089	-0.025895388	0.43674067	0.039712345	-0.060277182	0.158522355	0.017580504	0.046420686	0.099529433
MCZ_74044	-0.161428784	-0.059971967	0.081020846	-0.25094112	0.221131683	-0.070773497	-0.182659412	0.184817953	-0.029903645	0.101559174	-0.0152125	0.049571141	-0.128508812	0.057935907	0.107289725	-0.158210145	-0.194176824	-0.038015877	-0.16086828	-0.219196088	-0.041157493	-0.076573722	-0.204328473	-0.061377244	-0.136285781	-0.027764263	0.006160349	-0.082807001	0.071418953	0.021361338	-0.078864072	-0.015712313	0.025800876	-0.030629454	0.161702874	-0.065884335	0.266375769	0.036257414	0.002036923	0.351849691	0.055279659	-0.03053747	0.487450543	0.021133072	-0.052889604	0.144598943	0.00187893	0.032893741	0.11466918
MCZ_74048	-0.136630526	-0.078314398	0.069232684	-0.280179912	0.22655448	-0.081584967	-0.225018215	0.195757814	-0.041827821	0.117274234	-0.00141555	0.070781464	-0.12763515	0.057079053	0.099757125	-0.157397615	-0.182960661	-0.054012658	-0.160330091	-0.193293796	-0.046553484	-0.062206221	-0.211751365	-0.078928566	-0.126998689	-0.027388429	0.018776046	-0.063053397	0.065599259	0.027605251	-0.056666642	-0.016879099	0.03466402	-0.063557158	0.15614885	-0.080692413	0.264341257	0.04016742	0.006382452	0.341264871	0.034149056	-0.039966281	0.461890459	-0.018812199	-0.060261199	0.154722714	0.019755777	0.054963816	0.109836723
MCZ_74080	-0.131059324	-0.059540754	0.070834354	-0.284450336	0.227932414	-0.070760377	-0.237311495	0.182648378	-0.045191776	0.139314299	-0.009919883	0.042474234	-0.120948122	0.048950182	0.082211746	-0.178579479	-0.1621634	-0.042088606	-0.200703186	-0.189793389	-0.033537326	-0.094944462	-0.222733155	-0.058768027	-0.119253506	-0.013779182	0.015512263	-0.039122805	0.058319329	0.030343642	-0.050351533	-0.030572669	0.026467778	-0.053970255	0.139654829	-0.074862572	0.264291143	0.02915117	0.019582959	0.349516377	0.039927411	-0.006481264	0.46496606	0.04305892	-0.038907269	0.166305158	0.002897225	0.033149901	0.117369158
MCZ_74083	-0.153864859	-0.093715531	0.091682089	-0.286223913	0.189885455	-0.083766261	-0.236098156	0.163156423	-0.043785688	0.111237814	0.005359542	0.04021864	-0.149727719	0.025576335	0.1048858	-0.164914829	-0.143315279	-0.065224253	-0.1669234	-0.152723482	-0.058414531	-0.059352906	-0.177026509	-0.067839572	-0.142844913	-0.016477808	0.067850695	-0.073133558	0.072049357	0.016132741	-0.086404361	-0.012088642	0.065879953	0.007145718	0.120750818	-0.088160031	0.266819614	0.016177885	-0.005829776	0.362270543	0.033572305	-0.033039376	0.507362858	0.007656389	-0.034789054	0.156903238	0.006535808	0.010190154	0.118356677
MCZ_7897	-0.152609063	-0.072233693	0.089276585	-0.2523128	0.24870795	-0.076384791	-0.186121604	0.193788452	-0.04171613	0.104282508	0.022032751	0.06205237	-0.135385865	0.045601169	0.124374126	-0.155956769	-0.200093928	-0.058788096	-0.168449187	-0.215654436	-0.035725532	-0.055752274	-0.237366268	-0.080776742	-0.14962684	-0.034913492	0.004417956	-0.0932433	0.070588809	0.030886294	-0.073310436	-0.020903171	0.037319153	-0.014000505	0.164568004	-0.087989069	0.26090371	0.030001331	0.000311613	0.344605577	0.037223075	-0.032077036	0.428195147	0.025782118	-0.05516389	0.159036661	-0.002024763	0.037687025	0.133188355
MCZ_7905	-0.174271644	-0.031514628	0.086242596	-0.268555738	0.215345009	-0.084340438	-0.204945386	0.189371562	-0.0285834	0.104763153	0.06538274	0.073390257	-0.134177367	0.067291539	0.14776258	-0.092928473	-0.188719765	-0.075359429	-0.101035805	-0.218717447	-0.076937322	0.004085618	-0.235139984	-0.059742261	-0.182851433	-0.041812494	-0.026522816	-0.122232815	0.087513604	0.025634708	-0.093249675	-0.005367825	0.041995713	-0.046524596	0.186561384	-0.040163113	0.251675564	-0.035676416	-0.024607327	0.325587784	-0.026479228	-0.070516508	0.463579859	-0.010844521	-0.082944524	0.17639171	-0.000640899	0.076604381	0.114551238
MCZ_83656	-0.188536848	-0.050739968	0.092834554	-0.287838869	0.264018467	-0.068613834	-0.195399735	0.175368018	-0.031048891	0.149076167	-0.006755908	0.074093345	-0.153011675	0.030110694	0.12762373	-0.143827778	-0.176919559	-0.062084966	-0.147290891	-0.198395443	-0.043288839	-0.037645446	-0.224214026	-0.062181675	-0.124087693	-0.047127287	0.005267455	-0.042115884	0.084444621	0.019373587	-0.037864825	-0.012796751	0.044788865	-0.102972164	0.167452083	-0.091870647	0.207852964	0.07071107	0.006141423	0.344528679	0.038799107	-0.019955939	0.477389909	-0.062704358	-0.027029781	0.149273434	0.045025866	0.000287197	0.093615807
MCZ_83666	-0.173966364	-0.037939396	0.086220683	-0.27630442	0.201269398	-0.066333582	-0.182894957	0.155478994	-0.009045743	0.090640138	0.057316532	0.049626135	-0.137049965	0.025277868	0.132405046	-0.12134723	-0.154418406	-0.051088794	-0.126343341	-0.179855846	-0.040463772	-0.031984839	-0.188727319	-0.07654874	-0.14408147	-0.065842073	-0.018382035	-0.110036766	0.082881944	0.021871038	-0.073932503	-0.021811754	0.035174112	-0.100624104	0.156695746	-0.065683077	0.260817796	0.050394624	0.002729912	0.390423039	-0.004201928	-0.034086708	0.542807374	-0.080199654	-0.057977192	0.149849451	0.041036451	0.026697732	0.044671455
MCZ_92726	-0.162759102	-0.071174955	0.076760174	-0.230562467	0.209067021	-0.054491896	-0.170092932	0.162414442	-0.01320598	0.090027202	0.037189989	0.028155157	-0.129681732	0.044299142	0.124664063	-0.152599566	-0.157688555	-0.039010275	-0.154950567	-0.17618158	-0.027775738	-0.051193563	-0.185573129	-0.049269143	-0.158865932	-0.058536643	0.006897785	-0.105322249	0.071783295	0.016325119	-0.079711388	-0.024507043	0.02551195	-0.093159055	0.146666927	-0.073688878	0.261202588	0.064692356	0.010017115	0.404798393	0.032914067	-0.011565086	0.562245098	-0.018111439	-0.043861625	0.138718352	0.007081932	0.00904818	0.044734844
MCZ_93574	-0.120320783	-0.083988651	0.082718177	-0.309691581	0.222262197	-0.06320025	-0.227066362	0.181242616	-0.040361321	0.167298622	0.052461843	0.067536982	-0.085414222	0.027292414	0.111039647	-0.149901676	-0.229472883	-0.095109283	-0.173242082	-0.237712038	-0.064566363	-0.04307669	-0.249101367	-0.095374952	-0.173355596	-0.016545714	0.005137705	-0.061112615	0.107800963	0.040571762	-0.066420596	0.00304054	0.047436536	0.005836474	0.189569563	-0.105058026	0.237014505	0.005270288	0.002475167	0.295875671	0.00109581	-0.010897288	0.399336723	-0.052105031	-0.054626572	0.1580338	0.026161597	0.032024045	0.145762618
MVZ_226113	-0.173624456	-0.060050518	0.071062261	-0.285940356	0.210306165	-0.073873769	-0.21617504	0.163704528	-0.0495066	0.137867923	-0.001548567	0.061248786	-0.122568555	0.060994826	0.108320478	-0.141515552	-0.17793999	-0.054399396	-0.177256229	-0.20592443	-0.059930531	-0.081023962	-0.239785932	-0.072579282	-0.14848326	-0.00272395	0.002101844	-0.047016693	0.066158687	0.043814024	-0.059168555	-0.006854074	0.047747097	-0.009623831	0.154554231	-0.067459768	0.26043346	0.03423639	0.006893231	0.341646985	0.022860734	-0.026064461	0.446941448	0.015205132	-0.065954026	0.152170151	0.022883017	0.049116425	0.115781075
MVZ_226114	-0.187253517	-0.068481652	0.071873152	-0.291670448	0.235793321	-0.074716734	-0.195892438	0.172538627	-0.038172092	0.138341436	-0.005732989	0.073454015	-0.126653453	0.064634049	0.093331923	-0.142755554	-0.186051115	-0.05658016	-0.170958885	-0.208059558	-0.055684881	-0.07470495	-0.248198134	-0.079770396	-0.155105758	-0.028590943	0.011312711	-0.045393815	0.062667261	0.044432437	-0.05072975	-0.016471257	0.04948508	-0.001242036	0.156597426	-0.086390398	0.268711262	0.042161503	0.009464894	0.340389856	0.027633964	-0.024245956	0.415955497	0.006970287	-0.067252678	0.153453544	0.039761334	0.043986665	0.112601475
MVZ_226115	-0.177750779	-0.065171735	0.071602466	-0.264351927	0.222954386	-0.066834562	-0.203854839	0.158965873	-0.05449033	0.124698184	0.027210681	0.077934251	-0.140657883	0.060877841	0.096005523	-0.146887856	-0.187836344	-0.056544856	-0.170499193	-0.213537813	-0.06461389	-0.059647918	-0.237451724	-0.075976309	-0.135604046	-0.033871529	0.007424757	-0.062941128	0.059518084	0.038152155	-0.062016284	-0.012899539	0.047574239	-0.019263595	0.173399899	-0.056121532	0.261927844	0.039057794	0.002302345	0.341686493	0.026893693	-0.046425626	0.445587935	-0.023915597	-0.080502488	0.144589887	0.040412858	0.06174407	0.125443544
MVZ_235317	-0.146228531	-0.073553283	0.0656643	-0.263591028	0.208362929	-0.073712041	-0.196160913	0.159936617	-0.028516896	0.122204645	0.024115955	0.063261457	-0.126326918	0.075340284	0.105838894	-0.151653407	-0.184609149	-0.044377299	-0.181180369	-0.232552232	-0.063517816	-0.074918264	-0.240586422	-0.08011537	-0.162354739	-0.015931367	-0.008230135	-0.067432645	0.069482136	0.03656483	-0.068821207	-0.011353538	0.038359552	0.006579124	0.165288086	-0.061469419	0.268914031	0.031372251	0.004585561	0.335809554	0.031946682	-0.043366387	0.455565979	0.002731667	-0.067066742	0.144151338	0.024542809	0.05857105	0.110559467
MVZ_235320	-0.153067031	-0.085544588	0.061126939	-0.283624322	0.230894883	-0.068573116	-0.19910307	0.199133881	-0.041928066	0.109302921	0.037483269	0.08150623	-0.106181654	0.084018238	0.10695102	-0.133772916	-0.195946923	-0.067637685	-0.153486074	-0.243001302	-0.06669272	-0.048144212	-0.262535254	-0.071877196	-0.150201116	-0.034580544	-0.020964524	-0.067406201	0.088754386	0.033150116	-0.070802405	-0.023107077	0.033124209	0.008691202	0.17449853	-0.061842309	0.273956744	0.023855988	0.002791174	0.325211108	0.007542618	-0.041986748	0.415629224	-0.013853568	-0.104316484	0.12500843	0.033342349	0.080519682	0.104710694
MVZ_235323	-0.167991074	-0.087318762	0.066943274	-0.264628479	0.222302359	-0.074287532	-0.191054017	0.187621203	-0.036360022	0.110187632	0.018681728	0.063505487	-0.11945434	0.066037468	0.101453273	-0.147134941	-0.197913612	-0.051388635	-0.170806272	-0.23409335	-0.05491046	-0.052565011	-0.259731649	-0.060507934	-0.148693309	-0.021995053	-0.012859131	-0.081055334	0.091084764	0.029254755	-0.083095428	-0.002340217	0.041243729	0.030178066	0.18156314	-0.048961107	0.272456396	0.015329649	0.011561301	0.333954762	0.019996647	-0.039774486	0.427563833	0.034391046	-0.08691797	0.132702915	0.003880266	0.054198908	0.120947715
MVZ_257608	-0.134611792	-0.057027953	0.081398825	-0.303774889	0.2249026	-0.074048798	-0.22306657	0.183684325	-0.041280675	0.1292896	0.005166402	0.055393558	-0.109804406	0.041624422	0.097294174	-0.138289016	-0.180210306	-0.059304865	-0.166669314	-0.2091919	-0.058659263	-0.059288932	-0.21857606	-0.055850213	-0.152358697	-0.015761186	-0.00366523	-0.051346773	0.059775876	0.033573532	-0.062796733	-0.013334522	0.043011901	-0.025647948	0.170616601	-0.068211039	0.255024978	0.041068423	0.001398966	0.337010124	0.02968566	-0.040111794	0.467091416	-0.025167337	-0.050903847	0.131229783	0.027769686	0.05046855	0.111724235
MVZ_257612	-0.135640629	-0.050490564	0.079315772	-0.295873465	0.229300948	-0.074375	-0.232959963	0.179158078	-0.041557216	0.115479131	0.015036388	0.055504479	-0.110384191	0.048175287	0.101946151	-0.144910373	-0.178185414	-0.056294854	-0.169677936	-0.217306146	-0.055107457	-0.061649383	-0.227439986	-0.066048049	-0.161399777	-0.012035966	0.005051302	-0.05726322	0.05455903	0.039387385	-0.059123117	-0.016399649	0.042719697	-0.006513863	0.159501952	-0.073496921	0.266938618	0.02545522	0.008667587	0.36291514	0.025940429	-0.022415076	0.43299195	0.001287749	-0.058055403	0.139882545	0.016406445	0.045376044	0.114476976
MVZ_257613	-0.154352618	-0.092507546	0.068292196	-0.309344686	0.234649558	-0.081436045	-0.214738289	0.176633024	-0.041607475	0.113053554	-0.007545677	0.040721078	-0.119381577	0.041747437	0.088389131	-0.149966728	-0.155651887	-0.031368793	-0.176862009	-0.194357781	-0.034112358	-0.069837116	-0.224748827	-0.055190523	-0.148174424	0.002719642	-0.001060278	-0.038379412	0.046577235	0.025715168	-0.045651168	-0.021348298	0.035637576	-0.015955797	0.175270982	-0.056849689	0.26737674	0.042762129	0.003566633	0.360308563	0.037027691	-0.02422193	0.458679492	0.013078703	-0.045481976	0.136191218	-0.001347074	0.035089367	0.108058268
TCWC_50570	-0.163157378	-0.074077616	0.061930409	-0.279048127	0.197006918	-0.080470483	-0.20075039	0.181844807	-0.04996982	0.138400386	0.03047882	0.068775919	-0.102402068	0.09135427	0.099170816	-0.146224625	-0.205597396	-0.073152607	-0.172444196	-0.252068743	-0.079616374	-0.088015984	-0.278946743	-0.098863778	-0.149714785	-0.010993848	0.021657851	-0.0564583	0.079548524	0.051428516	-0.056467521	0.00260888	0.059189914	0.009779869	0.188849347	-0.055959018	0.252824775	0.028589176	0.000154716	0.322869839	0.021808056	-0.036935775	0.393651729	-0.001614402	-0.06784766	0.176912928	0.03547704	0.050801483	0.115378598
TCWC_50579	-0.149783095	-0.081456906	0.065615117	-0.27941497	0.219932686	-0.076125245	-0.194872612	0.193774306	-0.038869952	0.124431281	0.025463092	0.07880841	-0.090935787	0.115367338	0.111828578	-0.135023741	-0.204550716	-0.059602822	-0.171542847	-0.276745965	-0.088626495	-0.065523373	-0.295626291	-0.105652818	-0.145659004	-0.001509529	0.017144821	-0.067562627	0.093396558	0.049090206	-0.06985933	0.001982645	0.052878505	0.012510108	0.176981453	-0.078679528	0.257817106	0.029239437	0.009617496	0.314313981	0.026713866	-0.030729178	0.381111877	0.007553489	-0.072437655	0.172582663	0.018963627	0.056660664	0.102979131
TCWC_50585	-0.164458322	-0.057423967	0.074918877	-0.284701554	0.225000294	-0.074625359	-0.220671005	0.198938319	-0.029107955	0.107914062	0.032811878	0.068195282	-0.099638593	0.099998103	0.118074032	-0.119661538	-0.196567953	-0.054838333	-0.136151376	-0.264859308	-0.104855469	-0.024008982	-0.274165644	-0.096839908	-0.154021206	-0.014810102	0.019459461	-0.073080217	0.099909973	0.038402095	-0.08105691	0.007736129	0.058309713	-0.004363494	0.161522441	-0.084548779	0.267329587	0.011292012	0.012898655	0.327297523	0.002133502	-0.02976248	0.390893994	-0.009936827	-0.08612167	0.167569538	0.014732988	0.063620471	0.101282606
UF_116081	-0.164895476	-0.068279591	0.074046589	-0.303477478	0.212878398	-0.085697156	-0.215914038	0.166309627	-0.043470646	0.115274669	0.008670789	0.064416235	-0.147956311	0.044162715	0.111924621	-0.135484946	-0.177285496	-0.068075927	-0.127854413	-0.183852419	-0.044461279	-0.033084396	-0.192690626	-0.064141088	-0.163304654	-0.038590953	-0.000974101	-0.081702111	0.079477024	0.02482167	-0.063174862	0.003292266	0.047169472	-0.025030171	0.180993733	-0.05127233	0.264368462	0.021025179	-0.002269765	0.356609986	0.009886852	-0.039664293	0.456278869	-0.034768084	-0.082113813	0.163967063	0.016396735	0.052448221	0.108830984
UF_120916	-0.132879216	-0.065021761	0.057744768	-0.304384763	0.189989181	-0.06919473	-0.23522836	0.153386872	-0.040020622	0.097247272	0.029370673	0.048581687	-0.105916719	0.026082806	0.113009844	-0.166706118	-0.166781756	-0.042752043	-0.178787461	-0.20337994	-0.048441735	-0.079052714	-0.212422732	-0.061775053	-0.155850894	-0.008075007	-9.86E-05	-0.073617782	0.074018601	0.021318131	-0.077806722	-0.002132447	0.028776814	0.032183412	0.167296689	-0.053421867	0.28863651	0.027387857	0.004828137	0.37015895	0.01493947	-0.026800683	0.44728861	0.012467745	-0.050416481	0.160679477	0.002777738	0.045282098	0.121619702
UF_120918	-0.147043953	-0.074954538	0.06772699	-0.291554535	0.233948476	-0.067259422	-0.215107017	0.195998821	-0.044888081	0.125564057	-0.001898444	0.004332627	-0.113949961	0.034714655	0.110931756	-0.171831599	-0.202941914	-0.039876405	-0.190836207	-0.231133784	-0.043732915	-0.097275004	-0.228274079	-0.043535586	-0.150087914	-0.022868878	0.023475068	-0.046740441	0.061540576	0.025189335	-0.053708443	-0.004659278	0.0366307	0.005804549	0.177509718	-0.055850994	0.269781072	0.034337709	0.028838548	0.3468736	0.040287375	0.002286806	0.419843055	0.027870049	-0.016583421	0.152697957	0.006043186	0.006907439	0.129551395
UF_120920	-0.138758594	-0.057112154	0.082506913	-0.306643182	0.23215872	-0.077471959	-0.236862113	0.185963315	-0.058142626	0.144409487	-0.017837869	0.036782124	-0.114314912	0.037204264	0.107782203	-0.178245124	-0.18997276	-0.051387324	-0.193783057	-0.198669629	-0.037280929	-0.098676761	-0.231522065	-0.057913769	-0.126795831	-0.018500491	0.00988289	-0.038120126	0.057504746	0.033573311	-0.053521068	-0.016888146	0.038557012	0.026510644	0.171744087	-0.072509247	0.266063364	0.047089591	0.010680274	0.336049334	0.047180875	-0.010855735	0.415937004	0.039084802	-0.028728978	0.160649749	0.005553811	0.030293637	0.125923818
UF_121720	-0.166409726	-0.069349149	0.0596004	-0.287634947	0.208651863	-0.079391	-0.224542817	0.164914004	-0.046433951	0.122287228	0.011827114	0.061701234	-0.140556394	0.041711976	0.091646178	-0.1581565	-0.176916097	-0.063922935	-0.173356497	-0.174988131	-0.039091967	-0.044434387	-0.208863003	-0.060732273	-0.164116867	-0.029103245	0.00964411	-0.055595546	0.06549526	0.041369654	-0.065647593	-0.018682922	0.047961791	0.006570412	0.161063933	-0.058689562	0.267695922	0.032137014	0.017225951	0.339560845	0.01985623	-0.033731663	0.467148169	0.001950403	-0.082507091	0.160481592	0.022076915	0.052033462	0.114270743
UF_121745	-0.166536529	-0.076052356	0.056023481	-0.296074236	0.232970557	-0.083954359	-0.205677649	0.184980859	-0.054222414	0.117854154	0.026264004	0.09045124	-0.123693954	0.078906282	0.10658356	-0.139378195	-0.184602713	-0.071060069	-0.159709582	-0.214522156	-0.074017971	-0.029931801	-0.243553997	-0.069995721	-0.155570188	-0.022478307	0.009700342	-0.064451169	0.064764363	0.052441665	-0.062129379	-0.00377373	0.0551958	-0.008970288	0.169237354	-0.07998874	0.274823834	0.013592608	-0.005625363	0.339649169	0.003758803	-0.049455525	0.400303953	0.016534088	-0.092641699	0.153964104	0.005122895	0.077812211	0.114331886
UF_121774	-0.162468245	-0.099517335	0.058045338	-0.279302728	0.213141001	-0.082039047	-0.194697053	0.169048502	-0.039662165	0.123593982	-0.00263034	0.068822952	-0.087906037	0.084612949	0.078281779	-0.148304656	-0.164726448	-0.036583211	-0.173962904	-0.213353043	-0.065325039	-0.084134494	-0.224207116	-0.059947495	-0.161577084	-0.032154469	0.005996392	-0.067650027	0.066420442	0.043223439	-0.080801975	-0.00635804	0.05096048	-0.001554885	0.181124813	-0.068178339	0.268745498	0.032316435	0.00053301	0.342699191	0.025278456	-0.032310019	0.456690145	0.030651594	-0.074745524	0.148894973	0.013945414	0.055995842	0.110950266
UF_121859	-0.160761539	-0.059768536	0.066988338	-0.293189231	0.21978206	-0.076963727	-0.214350663	0.205382355	-0.046211711	0.142167371	0.036116383	0.112083323	-0.088571579	0.096689884	0.134319375	-0.128365892	-0.205882038	-0.07177766	-0.143335147	-0.246058996	-0.086740999	-0.032522017	-0.280729819	-0.083897157	-0.151030807	-0.015658014	-0.022861034	-0.05810662	0.087978976	0.045881792	-0.070382896	-0.01333959	0.035796505	-0.021907096	0.17634321	-0.068373062	0.262827966	0.021383622	0.001464258	0.32142278	0.001523482	-0.050447726	0.380033904	-0.018529258	-0.090147088	0.175283778	0.027188119	0.075542949	0.084306822
UF_121992	-0.170136433	-0.058418879	0.070821711	-0.287784698	0.227504303	-0.072218219	-0.221581304	0.166455927	-0.062354987	0.122126947	-0.035248335	0.076868276	-0.130860043	0.047831585	0.078724189	-0.137803581	-0.157134881	-0.048349973	-0.162765367	-0.163343339	-0.042262739	-0.048644595	-0.199175667	-0.041106818	-0.137514014	-0.034892723	-0.006363378	-0.059330012	0.054868176	0.046769167	-0.067159567	-0.027800388	0.038726761	-0.033506869	0.175688116	-0.063951772	0.28142216	0.02536265	0.001259246	0.36791985	0.023222802	-0.047432972	0.47865932	0.022005619	-0.074836465	0.123281443	0.008206617	0.046524218	0.09788849
UF_121994	-0.176172267	-0.031925881	0.062686375	-0.29622222	0.237446047	-0.078804152	-0.202165011	0.154660789	-0.057687489	0.135260231	-0.025330941	0.059675186	-0.127975961	0.051891692	0.089927235	-0.151285441	-0.163364314	-0.059418944	-0.17966561	-0.17715799	-0.047273535	-0.049866302	-0.196368376	-0.046059787	-0.161446928	-0.040439828	0.021030076	-0.049916121	0.037294911	0.056545906	-0.062599661	-0.037505355	0.050878214	-0.020551376	0.16930369	-0.081590608	0.276968189	0.030710414	-0.001989091	0.360278151	0.030456224	-0.03190359	0.455322756	0.034268127	-0.058685442	0.148840214	0.010339319	0.043411085	0.106104439
UF_122005	-0.164549279	-0.017388003	0.108080409	-0.258888454	0.210097643	-0.079300725	-0.17616628	0.182181219	-0.042328631	0.133530548	0.006114442	0.049221795	-0.145433406	0.023753913	0.113567813	-0.149652261	-0.198431697	-0.059135273	-0.179371808	-0.19726329	-0.052288355	-0.062145076	-0.237693214	-0.056351862	-0.1821118	-0.004206414	-0.00011793	-0.060248301	0.059193019	0.039574426	-0.063765598	-0.03949512	0.030918665	-0.009634654	0.189207635	-0.07009679	0.262924745	0.016890598	-0.013509899	0.341035426	0.042910753	-0.033191061	0.456610315	0.039926885	-0.041831769	0.15425298	0.018996768	0.037895181	0.093778453
UF_122009	-0.181494241	-0.011943113	0.094108619	-0.267153244	0.210746008	-0.078085901	-0.190318493	0.171436235	-0.040043533	0.135276863	0.012848244	0.046160649	-0.150713331	0.022045799	0.106157026	-0.150182886	-0.181791477	-0.060036944	-0.180223897	-0.190841078	-0.049498511	-0.06711302	-0.227792746	-0.058515934	-0.163753139	-0.023215156	0.005384021	-0.062010579	0.047417628	0.031696234	-0.066009331	-0.024665464	0.040183896	-0.013602387	0.166010016	-0.058605388	0.276833264	0.029958012	-0.012162908	0.353288742	0.031864615	-0.034517098	0.453555892	0.033117523	-0.04059764	0.15536564	0.017768458	0.034941448	0.113451867
UF_122044	-0.188629178	-0.077644421	0.045238922	-0.278028844	0.166879171	-0.0631808	-0.210017712	0.156398129	-0.036447665	0.150392151	8.71E-05	0.069116712	-0.150614972	0.097116653	0.047629209	-0.170383369	-0.175149523	-0.057200247	-0.183857371	-0.189055987	-0.051855096	-0.07065128	-0.213969205	-0.066968205	-0.174011081	-0.013386113	0.012828674	-0.053383452	0.07706005	0.054725759	-0.065877828	-0.011896519	0.061030787	0.000981961	0.150487996	-0.059486154	0.287353167	0.029291115	0.005448015	0.342603716	0.02744977	-0.039074575	0.442425878	0.02688909	-0.072394656	0.183938385	0.004058226	0.063420226	0.136469788
UF_122045	-0.177605057	-0.08763305	0.032828171	-0.277792586	0.178220986	-0.071591099	-0.214081775	0.161969669	-0.027933892	0.121472591	0.057011584	0.074654321	-0.154675896	0.055505259	0.085505711	-0.138071136	-0.187329751	-0.066930226	-0.154970583	-0.183851799	-0.045765455	-0.033609722	-0.193954746	-0.044754733	-0.196875429	-0.025416476	-0.010629962	-0.088063225	0.078960154	0.038731394	-0.092633104	-0.000557065	0.05205104	0.021218356	0.182507011	-0.046695036	0.271496814	-0.005459172	-0.005444264	0.347649954	0.007925212	-0.049888756	0.455098122	0.00179816	-0.093469429	0.182113263	-0.002790563	0.055193284	0.142699344
UF_12270_6	-0.186103576	-0.066196517	0.092739425	-0.280145039	0.224380677	-0.060118527	-0.207042335	0.168849855	-0.037142024	0.140623049	-0.030381696	-0.018083074	-0.139902374	0.026201029	0.11406806	-0.178024416	-0.168704271	-0.022534627	-0.19719295	-0.184694776	-0.008454442	-0.103488171	-0.203343591	-0.041841643	-0.145605007	-0.005664078	0.016422227	-0.043605971	0.034826356	0.017075298	-0.057414068	-0.03721975	0.032784046	0.002830301	0.176080289	-0.069837417	0.268152892	0.034491175	-0.009450842	0.353176825	0.057096698	0.008862992	0.480908437	0.062356854	0.033327542	0.155582807	-0.002880536	-0.02668407	0.129838221
UF_12271_2	-0.19664535	-0.063371817	0.072315305	-0.26369765	0.237761411	-0.082271984	-0.193865134	0.170838068	-0.049859377	0.141306132	-0.045252591	0.0500048	-0.144691856	0.043440265	0.093443178	-0.152752607	-0.165772004	-0.036879329	-0.175500613	-0.178586404	-0.035858919	-0.087293833	-0.206813127	-0.040261161	-0.14372163	-0.023306512	0.016105888	-0.047780934	0.030615861	0.038512318	-0.058837961	-0.038153913	0.048603529	-0.024764315	0.17766929	-0.078222603	0.268767042	0.03343385	-0.000652059	0.358339456	0.05444607	-0.023951559	0.466721067	0.051875874	-0.051899459	0.144444041	0.005571859	0.027833295	0.115972303
UF_122732	-0.146973066	-0.092465276	0.059658511	-0.262488349	0.221256479	-0.080798562	-0.195732157	0.183868188	-0.050882733	0.120805964	-0.012386366	0.071112437	-0.113827519	0.032989926	0.092992407	-0.156486614	-0.17395151	-0.047954937	-0.17726644	-0.185900541	-0.041757078	-0.070985441	-0.225977322	-0.038675423	-0.156486573	-0.032348383	0.006149729	-0.060795399	0.054159279	0.035025146	-0.071662003	-0.01009974	0.050145091	-0.021835143	0.192809182	-0.057084324	0.278176761	0.041398174	-0.011483847	0.362950679	0.0339145	-0.041427	0.4593477	0.017885883	-0.05054883	0.143786858	0.033513315	0.03994545	0.095505128
UF_122740	-0.159782009	-0.067057031	0.086508711	-0.27708071	0.218791757	-0.081690285	-0.204004592	0.167685779	-0.038715577	0.129896343	-0.018947827	0.043369456	-0.137608667	0.030297955	0.09423189	-0.17671635	-0.156831532	-0.036574167	-0.182277533	-0.175232585	-0.055021292	-0.082268073	-0.207082451	-0.022030104	-0.145971394	-0.024895423	0.015645273	-0.053080093	0.048820257	0.026263246	-0.069516141	-0.02000896	0.035669039	-0.009583106	0.163733258	-0.059172515	0.285695395	0.035368927	-0.004863423	0.369837954	0.04610392	-0.019543336	0.474572544	0.052592118	-0.031833741	0.145305827	-0.004609628	0.00516723	0.101090378
UF_122777	-0.162906949	-0.060986889	0.080805674	-0.291085292	0.206328425	-0.087129844	-0.215628413	0.176008907	-0.0386978	0.109989912	0.010983555	0.066542464	-0.134717534	0.04242407	0.104300182	-0.123924994	-0.166440532	-0.060914642	-0.145004679	-0.177642126	-0.053816955	-0.03709802	-0.200512932	-0.068126022	-0.152310127	-0.030836629	0.016660158	-0.085886168	0.067143204	0.03735281	-0.078194464	-0.007376564	0.058434531	-0.016108536	0.166876475	-0.06948131	0.279254564	0.024692254	-0.00567624	0.371071734	0.005761517	-0.045511874	0.475931833	-0.003183635	-0.068192844	0.125599084	0.007255533	0.046483979	0.087282356
UF_12286_3	-0.183607642	-0.095893115	0.038089341	-0.284961573	0.235882845	-0.070837811	-0.156733393	0.168153242	-0.044055777	0.11160068	-0.025775998	0.067514017	-0.067599455	0.086699109	0.08959472	-0.142217746	-0.186047182	-0.048559232	-0.1748424	-0.211667108	-0.055945069	-0.06612191	-0.243262983	-0.058042471	-0.155592803	0.000652731	0.00901064	-0.071488299	0.062281863	0.060885647	-0.069188843	-0.014095352	0.056589224	-0.046895824	0.1803554	-0.095597952	0.271237796	0.035264813	0.010187532	0.351279039	0.037611321	-0.028690814	0.447106952	0.03308273	-0.067813657	0.148516342	0.003603585	0.04751437	0.097296035
UF_124385	-0.18303397	-0.048841926	0.06209039	-0.286484026	0.203107825	-0.07248691	-0.210334146	0.185261233	-0.043593502	0.133855721	-0.025255463	0.088276777	-0.113406193	0.087272228	0.081361281	-0.138820871	-0.179766932	-0.063981426	-0.173976464	-0.233790313	-0.073574499	-0.068898574	-0.254068497	-0.080495403	-0.12599725	0.011352226	0.010684706	-0.036662932	0.077281908	0.049990574	-0.061286984	0.012250531	0.044947773	-0.034376436	0.149301747	-0.088924008	0.287859252	0.028404734	0.000471802	0.340922484	0.029526742	-0.033034615	0.411000278	0.037480544	-0.087394395	0.163116702	-0.017621751	0.079106213	0.094810552
UF_124386	-0.180014689	-0.039897103	0.073332872	-0.283935348	0.205090212	-0.055040137	-0.21178463	0.181736733	-0.022586667	0.10685979	0.034257987	0.072581634	-0.085404531	0.082643357	0.099525165	-0.109561557	-0.20085759	-0.065600239	-0.133719475	-0.250143878	-0.07347007	-0.039237569	-0.260720458	-0.066907339	-0.154370128	-0.008341625	-0.02118919	-0.078569206	0.093530959	0.024146209	-0.080208599	0.008876932	0.028537206	-0.024435741	0.182117226	-0.052582558	0.28309821	0.002224781	0.002800488	0.349206187	0.002470418	-0.03144467	0.426369509	-0.013127336	-0.091261839	0.148217496	0.021849641	0.076771619	0.087872537
UF_124393	-0.192255262	-0.081810533	0.068678317	-0.299152903	0.217173704	-0.082098734	-0.196610785	0.161491554	-0.044020555	0.106741688	0.016677157	0.080817383	-0.095745825	0.061844794	0.110082899	-0.125387204	-0.168841311	-0.067074097	-0.161483684	-0.184688675	-0.058483594	-0.035689747	-0.211010078	-0.067533072	-0.15448144	-0.033859751	0.01891287	-0.076435581	0.081402805	0.032348285	-0.081603541	-0.011062247	0.041961395	-0.035825897	0.165916397	-0.07692162	0.280832858	0.015035177	0.00473406	0.354552629	0.012868235	-0.038941775	0.447643398	-0.004959661	-0.082808601	0.155021453	0.02190945	0.052787599	0.119089152
UF_124394	-0.157913908	-0.072470947	0.068858874	-0.311753981	0.233650502	-0.077870932	-0.222408754	0.179600694	-0.040407266	0.085247985	0.045201732	0.085351192	-0.094684781	0.052872055	0.104984884	-0.114746649	-0.166946984	-0.065159807	-0.141268078	-0.192733622	-0.056682254	-0.019093673	-0.205933499	-0.057819824	-0.153284306	-0.038710533	-0.009724886	-0.094668441	0.06572895	0.038612696	-0.084267002	-0.012014	0.040742503	-0.031302185	0.167810438	-0.069451116	0.278870969	0.012091822	0.000546788	0.359904347	-0.004842194	-0.051094575	0.448345284	-0.019863993	-0.078076355	0.155797515	0.009001197	0.051369173	0.116451962
UF_124441	-0.166507785	-0.041229483	0.040249688	-0.260303247	0.214141056	-0.064781903	-0.188154707	0.179498806	-0.022047363	0.11333945	0.005880245	0.047967046	-0.136816922	0.003191501	0.071496665	-0.160761866	-0.191320964	-0.058114217	-0.167965625	-0.199686573	-0.031597937	-0.061296133	-0.215194107	-0.041987513	-0.137160249	0.007433941	0.014819726	-0.066402418	0.063520765	0.042080068	-0.05293709	-0.016742686	0.042806097	-0.075373807	0.157844498	-0.063296334	0.269893541	0.045044526	-0.002462823	0.377673211	0.039413496	-0.040943294	0.503572272	-0.008812557	-0.04393742	0.150444236	0.028876436	0.033060405	0.051141663
UF_124449	-0.144709782	-0.025003355	0.092820735	-0.248312963	0.202724967	-0.057521686	-0.178891458	0.173850695	-0.00938118	0.095882027	0.026045312	0.019239281	-0.114991571	0.054648598	0.133035499	-0.133579933	-0.194723524	-0.061319762	-0.160480516	-0.211186427	-0.0497627	-0.05350996	-0.217364006	-0.060465192	-0.169892739	-0.025487812	0.002663932	-0.094364197	0.072636587	0.026752368	-0.083887543	-0.003247466	0.036233055	-0.081349087	0.139833839	-0.0642133	0.271136978	0.031941984	-0.011927333	0.377303297	0.0226525	-0.019735858	0.520298105	-0.008446356	-0.013986074	0.134285646	0.019416043	0.01322833	0.077571782
UF_15358	-0.175982406	-0.078792928	0.065977075	-0.276963311	0.233601426	-0.080452569	-0.179887234	0.184223736	-0.046905001	0.130173934	-0.00735312	0.068977381	-0.120766842	0.052524673	0.099199082	-0.140767806	-0.176409692	-0.054713508	-0.165535665	-0.191461628	-0.040304925	-0.057910872	-0.208787898	-0.061045365	-0.158932548	-0.058253899	0.021050169	-0.063865176	0.060677996	0.037853376	-0.057767009	-0.032366123	0.041711656	-0.038683172	0.182077594	-0.075740538	0.256411686	0.044676961	-0.000127138	0.358957277	0.025970663	-0.03655407	0.465023504	-0.001255625	-0.064078357	0.137406089	0.034235356	0.043335504	0.091840563
UF_15359	-0.158994945	-0.123373343	0.068371939	-0.262799195	0.248627402	-0.077732755	-0.183732429	0.177616436	-0.040445649	0.09341806	0.030393024	0.082076118	-0.113353128	0.050013883	0.110831353	-0.15325974	-0.191418983	-0.054312258	-0.153506256	-0.208138184	-0.038612105	-0.051720474	-0.211200418	-0.066923769	-0.163347956	-0.061536363	0.00108797	-0.089741117	0.082902689	0.02176808	-0.087888156	-0.011679841	0.03808691	0.01024411	0.189259261	-0.086688983	0.263595435	0.029888514	0.012850158	0.352852278	0.022066547	-0.037452589	0.437482511	0.00337569	-0.092682107	0.128308318	0.010905963	0.050430132	0.135466459
UF_16604	-0.163173983	-0.046242284	0.06681358	-0.281812379	0.225725997	-0.067287444	-0.213984201	0.169074951	-0.038866657	0.118513666	-0.028323968	0.066919794	-0.136402894	0.02176677	0.092512534	-0.146667113	-0.161476088	-0.046603503	-0.173715039	-0.185326417	-0.052913869	-0.07931442	-0.215941095	-0.03995045	-0.137018276	-0.02050288	0.030061047	-0.056438097	0.060117509	0.02325468	-0.05933704	-0.017655928	0.044618848	-0.016718766	0.143023498	-0.07488232	0.255646767	0.03715272	-0.00435674	0.363454682	0.037814456	-0.032860053	0.504419344	0.023610692	-0.041600751	0.114466355	0.003236214	0.015547513	0.115329562
UF_16606	-0.163797962	-0.111326107	0.06435681	-0.263571337	0.224071328	-0.073397915	-0.183365555	0.171534036	-0.03607755	0.114477492	-0.00720264	0.037770551	-0.133199518	0.011904875	0.105915829	-0.164345946	-0.164245317	-0.035981014	-0.177409011	-0.183626383	-0.044060613	-0.070506241	-0.212488938	-0.027847762	-0.146383635	0.017567732	0.026611927	-0.061852445	0.057100553	0.026297372	-0.061997576	-0.012296711	0.042410146	-0.034103646	0.157489144	-0.072033413	0.260123733	0.041038035	0.001579611	0.374698459	0.045099664	-0.020118287	0.515300054	0.017684017	-0.036526924	0.10803841	0.002070905	0.000544988	0.092180651
UF_16613	-0.183304706	-0.076716896	0.065727982	-0.27009876	0.22618767	-0.066565733	-0.181618059	0.16820394	-0.047042164	0.120737776	-0.003120811	0.088320618	-0.16583943	0.003254721	0.099234927	-0.140751562	-0.180229148	-0.044680368	-0.147029868	-0.194281446	-0.059833662	-0.061649546	-0.209729691	-0.036750339	-0.138004575	-0.008814681	-0.014287988	-0.068008138	0.065263535	0.018900535	-0.068440075	-0.018828433	0.043153435	-0.029628879	0.186921625	-0.069285437	0.259223819	0.027940713	0.001529755	0.354710997	0.013248617	-0.045117225	0.478026022	-7.54E-05	-0.093072821	0.138105044	0.03015613	0.053283135	0.104333028
UF_16622	-0.174071731	-0.070974923	0.067359893	-0.291070714	0.232625046	-0.08047424	-0.215961578	0.17481288	-0.063274655	0.146136776	-0.032167627	0.06068874	-0.153869491	0.026425282	0.090025214	-0.161252291	-0.173095173	-0.055211052	-0.173235926	-0.188441795	-0.0346117	-0.075070982	-0.208001237	-0.06290066	-0.143760111	0.009270705	0.018488139	-0.047604265	0.06201759	0.053191091	-0.045573576	-0.029342731	0.042836646	-0.023246858	0.148011959	-0.080733889	0.277754738	0.038330864	0.006493638	0.337990809	0.030465767	-0.030155235	0.437552364	0.027794859	-0.065294901	0.155657446	0.032716552	0.053233372	0.136530703
UF_169174	-0.163881961	-0.04389592	0.099362543	-0.277413211	0.203933107	-0.09585233	-0.213224591	0.17014596	-0.039192889	0.129688955	-0.005331741	0.051623442	-0.141917408	0.018201492	0.119754093	-0.173220184	-0.17302586	-0.061624448	-0.188623864	-0.183785023	-0.046191	-0.066130832	-0.21863645	-0.067728503	-0.152270134	-0.015194612	0.006700523	-0.043996089	0.054550755	0.035350019	-0.05794859	-0.012337967	0.048872335	0.006270484	0.150588563	-0.067909247	0.270756721	0.041876524	-0.000107371	0.35455597	0.039704248	-0.023237352	0.455185481	0.02274077	-0.046953434	0.163596881	0.015637664	0.021232174	0.097071094
UF_169364	-0.190246102	-0.046532784	0.076135317	-0.278417738	0.215156034	-0.087264375	-0.208775189	0.177833344	-0.040900574	0.143628935	-0.034200253	0.024549436	-0.161587487	0.057708159	0.095439788	-0.16932005	-0.180953794	-0.036271764	-0.178547817	-0.182535052	-0.023184091	-0.079532264	-0.230021151	-0.069134694	-0.139953034	0.021135087	0.015366054	-0.030845024	0.034136179	0.048923384	-0.038054685	-0.037131591	0.03912886	-0.017803339	0.160673625	-0.053181575	0.253113961	0.039047425	0.00209726	0.353895333	0.050497897	-0.010803481	0.466178689	0.04528963	-0.035150002	0.155761267	0.0111805	0.01103096	0.101978541
UF_16970	-0.156112898	-0.076277068	0.067579885	-0.2850525	0.217772083	-0.082773358	-0.198797968	0.166450485	-0.056310651	0.123036599	0.002044508	0.047491792	-0.10077199	0.086027673	0.100219713	-0.160369869	-0.177982271	-0.045058565	-0.203763641	-0.238596516	-0.062691886	-0.097425711	-0.262591277	-0.083251517	-0.12592142	-0.004694762	0.024011483	-0.055998305	0.062895385	0.046219852	-0.061465871	0.0007879	0.055138456	-0.002973866	0.177919813	-0.060647998	0.283325639	0.031473501	0.010219858	0.344644883	0.036777187	-0.020103366	0.402403555	0.048751805	-0.052110379	0.158273831	-0.005316786	0.052310524	0.122706617
UF_16981	-0.215759146	-0.075298954	0.056399346	-0.299880521	0.21186578	-0.092897036	-0.198439601	0.158562838	-0.055628897	0.139274491	-0.009124125	0.062017618	-0.081852128	0.080859521	0.112080587	-0.150801883	-0.176975474	-0.063743438	-0.19266485	-0.201560712	-0.057960478	-0.083215204	-0.244537971	-0.088030354	-0.153152603	-0.005826519	0.031758233	-0.039564493	0.066642119	0.061620635	-0.055090698	-0.001888718	0.063037343	0.008028903	0.147758647	-0.083303674	0.273376472	0.036059112	0.006181979	0.335558996	0.039883409	-0.023646829	0.416931363	0.041295929	-0.064455404	0.162826765	0.008866084	0.046827459	0.111426507
UF_174223	-0.169127497	-0.023827482	0.071103406	-0.303545314	0.201222805	-0.074216097	-0.228269203	0.173337531	-0.049676604	0.116849266	0.031263902	0.085674074	-0.112900329	0.091191048	0.082569714	-0.121306198	-0.177102367	-0.076316852	-0.137350687	-0.221952255	-0.099434873	-0.034039761	-0.224891396	-0.117743422	-0.139050032	-0.020524914	0.035111033	-0.075220534	0.075555611	0.052814101	-0.072746961	-0.008704245	0.083766271	-0.039552425	0.135551245	-0.093682609	0.283323059	0.012541268	-0.002025831	0.34937009	-0.001559278	-0.038846307	0.420961456	-0.026670062	-0.102663659	0.163540557	0.032237092	0.068707107	0.105047506
UF_17467	-0.152069817	-0.001804463	0.086315897	-0.259518216	0.208658007	-0.069661187	-0.206388236	0.179732229	-0.034364521	0.131375329	0.014073265	0.036133182	-0.114563763	0.064361711	0.12926848	-0.134883033	-0.20147044	-0.060659874	-0.154133906	-0.224585952	-0.064519986	-0.064024175	-0.255767744	-0.079066978	-0.180795249	-0.01665241	0.003029534	-0.098815778	0.075819495	0.02649435	-0.07131551	-0.010931067	0.045529103	-0.037650604	0.16302692	-0.059828538	0.266898306	0.019003242	0.005666726	0.356039993	0.022496951	-0.029735799	0.425297605	0.009962041	-0.045465993	0.163528835	0.008643547	0.043232278	0.127861073
UF_17468	-0.18172501	-0.049861289	0.062235533	-0.254049004	0.189302052	-0.071631237	-0.204737841	0.150436027	-0.028183391	0.108385362	0.021200523	0.036329198	-0.154637499	0.063141668	0.124973174	-0.145253215	-0.183176295	-0.052377001	-0.16032294	-0.197089679	-0.057453631	-0.064114772	-0.227236389	-0.058935267	-0.173931442	-0.005368083	0.005453165	-0.09289699	0.081705213	0.026238775	-0.071567285	-0.010126142	0.040435087	-0.019517533	0.162866745	-0.044159186	0.271322506	0.025343032	-0.009233612	0.35185542	0.030664328	-0.029591856	0.462276151	0.005181348	-0.050775537	0.180576698	0.001293521	0.031746744	0.145976299
UF_17996	-0.182756567	-0.110798357	-0.035789396	-0.287888632	0.246935778	0.049629616	-0.223068386	0.206232923	0.029133904	0.112018082	0.008958968	-0.067133437	-0.159202303	0.025228976	-0.072773779	-0.147139646	-0.189939362	0.060001911	-0.162965447	-0.206399197	0.049457147	-0.064556919	-0.229122145	0.041649949	-0.158114372	-0.042347576	0.019807595	-0.083206408	0.079298815	-0.018718696	-0.088110383	-0.010050421	-0.024229117	-0.013709609	0.194058483	0.037161661	0.283169134	0.027192947	-0.016949251	0.389152023	0.024566885	0.030060004	0.543242839	-0.000634275	0.057034802	0.149124975	0.023055614	-0.052684012	0.110128205
UF_18485	-0.135273712	-0.061436327	0.090470763	-0.256904076	0.196457095	-0.08976963	-0.195203858	0.180150733	-0.033774723	0.109210533	0.01947268	0.036253086	-0.122447458	0.031675872	0.119384145	-0.166115597	-0.195913928	-0.060997753	-0.17980855	-0.201726635	-0.058273226	-0.061084621	-0.22953107	-0.053208053	-0.173944782	-0.02915405	-0.001241243	-0.065657566	0.078992204	0.037581056	-0.066848917	-0.008503796	0.046320053	-0.028683687	0.186796281	-0.051125917	0.264895391	0.024547708	0.00895354	0.361127285	0.0190229	-0.021364687	0.457478067	0.013792097	-0.0536345	0.150753107	0.012346664	0.028756621	0.110962051
UF_18515	-0.169187175	-0.068220514	0.084554604	-0.269302926	0.212381373	-0.091800959	-0.200736526	0.189507488	-0.036954526	0.122724527	-0.004266071	0.039462531	-0.129967999	0.039513246	0.113262591	-0.152591949	-0.187277233	-0.060632896	-0.184433471	-0.18581705	-0.041759004	-0.071527536	-0.230360581	-0.049015746	-0.166072634	-0.022611266	0.011284876	-0.04832855	0.079308026	0.039921587	-0.058432714	-0.010989112	0.046275477	0.002495574	0.165633645	-0.06673548	0.269138903	0.031593428	-0.001116772	0.344076145	0.045322702	-0.019724703	0.453570226	0.04860735	-0.047135401	0.157511839	-0.006597585	0.023000245	0.10381252
UF_18517	-0.169850368	-0.080001121	0.073084429	-0.275760694	0.234829834	-0.079050411	-0.199631165	0.179649919	-0.034055483	0.135982636	0.007950709	0.047870109	-0.148515953	0.022089844	0.117667656	-0.141388371	-0.194303654	-0.054950601	-0.174902843	-0.185932686	-0.039514894	-0.062073443	-0.222288248	-0.05153127	-0.160837883	-0.014746081	0.00850563	-0.063664033	0.074525589	0.021091009	-0.065590602	-0.013091377	0.041364435	-0.004998982	0.15899598	-0.074378928	0.265284409	0.031969746	0.008474467	0.346912612	0.031623592	-0.0239239	0.446389275	0.019428325	-0.056025209	0.16232353	0.020882375	0.036770973	0.103885357
UF_18548	-0.15049612	-0.039288269	0.077307613	-0.251297442	0.20966366	-0.068124086	-0.186626265	0.157018494	-0.021233269	0.081456544	0.018946738	0.017230292	-0.119192326	0.040935166	0.114363252	-0.145018978	-0.174808118	-0.053022809	-0.165534199	-0.188258177	-0.036025406	-0.066789658	-0.210985644	-0.048256828	-0.160782559	-0.022762773	0.023193618	-0.091292406	0.067127724	0.03438119	-0.081528543	-0.016432749	0.042414287	-0.053518882	0.147584567	-0.055824843	0.291547458	0.034518506	-0.002578458	0.399696662	0.028262731	-0.025097069	0.516961054	0.020037936	-0.02053269	0.130298672	0.005878163	0.011289464	0.065981575
UF_18606	-0.145182641	-0.080741042	0.076477565	-0.272021859	0.234467814	-0.082909787	-0.205447518	0.206078734	-0.048018923	0.135327855	0.015054627	0.068068813	-0.119118167	0.0421215	0.10496412	-0.16364633	-0.209772018	-0.060878498	-0.175739066	-0.222630246	-0.051344713	-0.051423571	-0.243085302	-0.061377138	-0.167121509	-0.010101055	-0.000932908	-0.05845856	0.084201108	0.02993783	-0.063629821	-0.013977771	0.032824982	0.004459827	0.16918014	-0.060832534	0.256702758	0.026905685	0.008015956	0.3222915	0.022791882	-0.031362084	0.414565014	0.031878945	-0.071853622	0.166001742	0.016500719	0.05480608	0.117552788
UF_18607	-0.160590568	-0.076387253	0.046566504	-0.304836018	0.22027453	-0.079415187	-0.231754311	0.195470004	-0.029554384	0.130957128	0.026531902	0.061269309	-0.13180522	0.02401708	0.098837816	-0.148719233	-0.21220613	-0.064835564	-0.162552532	-0.235847851	-0.057339577	-0.031832496	-0.233300047	-0.059376465	-0.166412489	0.029201647	-0.002311422	-0.05453658	0.084668045	0.029236315	-0.046161368	0.003950619	0.039098418	0.019272983	0.169992408	-0.059270398	0.257847117	0.026393096	0.010322692	0.311636738	0.012480422	-0.028923387	0.4134548	-0.014620497	-0.082444429	0.180682721	0.016559435	0.059769218	0.116375488
UF_18639	-0.172401531	-0.06224399	0.085045486	-0.262267768	0.208196959	-0.079344115	-0.192422756	0.18892323	-0.041865155	0.124306851	-0.000143201	0.034024777	-0.140441555	0.020816009	0.121531347	-0.172643476	-0.188613213	-0.048531911	-0.191266944	-0.212225873	-0.044981299	-0.058093396	-0.240967325	-0.047813901	-0.163795305	-0.002155302	0.002651398	-0.05135389	0.071699131	0.02875903	-0.063303464	-0.012689638	0.036505908	0.011715482	0.175025519	-0.056050128	0.267759301	0.027651199	0.007232411	0.339663076	0.037395986	-0.017561677	0.438185202	0.040559231	-0.048326056	0.163303881	0.013412526	0.031789118	0.125009105
UF_18717	-0.177379882	-0.032062471	0.104416612	-0.281687374	0.22383657	-0.096655096	-0.206915159	0.193272981	-0.045104014	0.145951348	0.000717098	0.042481173	-0.133266866	0.012977532	0.138328073	-0.16301977	-0.193040234	-0.069427375	-0.18171008	-0.203714087	-0.058951632	-0.057080915	-0.236692528	-0.063310011	-0.153596614	-0.014706926	0.028750077	-0.055566866	0.072937434	0.029044347	-0.06607909	-0.011374925	0.041588406	0.012540334	0.151334626	-0.078124029	0.256829553	0.030816898	0.004711389	0.332690402	0.044529062	-0.020430951	0.415697784	0.035876155	-0.044010567	0.177298302	-0.000559835	0.037311051	0.125415768
UF_21653	-0.185267666	-0.060383005	0.084841007	-0.274376169	0.243743662	-0.077545174	-0.206280178	0.214275486	-0.036267783	0.132785201	0.034990936	0.037184692	-0.16105647	0.037509734	0.115481134	-0.151504104	-0.156480391	-0.010170994	-0.164835587	-0.159564321	-0.053655816	-0.168767081	-0.187572035	-0.047037939	-0.058132769	-0.203748358	-0.057690341	-0.138549413	0.022526327	-0.022051764	-0.056544534	0.088208789	0.029247431	-0.056593847	0.020585669	0.036153865	0.286485126	0.048963034	0.008246602	0.383724769	0.037118014	-0.025984997	0.498909569	0.011224844	-0.042325187	0.187005456	0.031958659	0.005687249	0.128035762
UF_21860	-0.170364565	-0.084938538	0.074556846	-0.254313088	0.201486248	-0.071020716	-0.18382407	0.157889356	-0.038346462	0.107839069	0.026067374	0.044665333	-0.137289628	0.028683879	0.108842541	-0.166822052	-0.171097396	-0.048227619	-0.18073605	-0.185088747	-0.039674582	-0.066576664	-0.213009708	-0.048662153	-0.175867595	-0.016988814	-0.000418719	-0.084570853	0.072752184	0.015549879	-0.076636744	-0.011066226	0.035713618	-0.017266377	0.159902615	-0.049304755	0.273741044	0.032387736	0.004048066	0.359269544	0.036198289	-0.03318221	0.476112818	0.016552999	-0.05620598	0.169865166	0.013244139	0.036985087	0.136911668
UF_21864	-0.172673911	-0.075458274	0.073489902	-0.266334815	0.214313863	-0.066006115	-0.203343176	0.169565188	-0.038584301	0.110568143	0.013598879	0.05842078	-0.141540729	0.041046112	0.10613366	-0.154484939	-0.185128002	-0.049127023	-0.155827718	-0.190712501	-0.048237496	-0.058133702	-0.208496258	-0.044738744	-0.168967539	-0.023366373	-0.000822221	-0.079047164	0.068352975	0.017924024	-0.074892005	-0.018507008	0.027068119	-0.000504912	0.163908032	-0.053367614	0.286383312	0.027002667	-0.003838911	0.352677619	0.029321893	-0.036702447	0.460678374	0.007360026	-0.06226936	0.159605526	0.017592298	0.040225498	0.118064692
UF_21869	-0.170735605	-0.081323899	0.061582982	-0.281414705	0.23484352	-0.069537799	-0.213955603	0.179353029	-0.042545117	0.142506677	0.008967145	0.062146986	-0.148296042	0.02448975	0.102915293	-0.153949326	-0.195813658	-0.051329563	-0.175897478	-0.211016637	-0.051498062	-0.056422015	-0.243891805	-0.051009811	-0.153307006	0.002171594	-0.000655654	-0.054506646	0.08172979	0.027453528	-0.058833104	0.001969926	0.044250296	0.012549007	0.172341865	-0.072889586	0.279630298	0.008931823	0.003540816	0.335959227	0.025862956	-0.021743823	0.407108219	0.031301348	-0.064790963	0.164072541	0.022672555	0.044802839	0.108420194
UF_21874	-0.170427756	-0.034561277	0.095148248	-0.281086633	0.203584815	-0.072678793	-0.20570237	0.157028855	-0.042804711	0.112890935	0.019661882	0.060808937	-0.156456406	0.000753171	0.11256375	-0.146383313	-0.190735935	-0.071672273	-0.173045397	-0.187350054	-0.050723384	-0.056362134	-0.216302515	-0.05927319	-0.148668092	-0.015934479	0.003481764	-0.069531952	0.069586016	0.024974357	-0.062538903	0.006602483	0.04053699	0.014097084	0.159681445	-0.063327492	0.281981022	0.026604246	0.009150053	0.34783442	0.031292304	-0.030273618	0.469768908	-1.11E-05	-0.078403835	0.14557306	0.017592811	0.04517623	0.10032664
UF_21876	-0.149783742	-0.06997383	0.072980836	-0.257533089	0.233303121	-0.062678408	-0.188775249	0.186352809	-0.028507236	0.084089766	0.021014541	0.073946499	-0.139353418	0.026845824	0.108771617	-0.135274301	-0.186881035	-0.062230143	-0.144307694	-0.220365578	-0.05436486	-0.029296842	-0.242158374	-0.049610412	-0.147968275	-0.013708137	-0.009800494	-0.087609291	0.070495587	0.013954436	-0.08783933	-0.008260583	0.027182995	-0.037951139	0.174851636	-0.064621999	0.269463278	0.018977507	-0.014843673	0.358803356	0.006764007	-0.047861541	0.463905745	-0.011495872	-0.079269836	0.137139149	0.032573007	0.06108958	0.109750745
UF_21877	-0.181706781	-0.047605569	0.076308705	-0.256724771	0.208650259	-0.066414574	-0.189987525	0.172080992	-0.035193036	0.11124803	-0.010879175	0.043845062	-0.140864298	0.037713207	0.100407192	-0.159668984	-0.174872875	-0.0464069	-0.173065861	-0.209305616	-0.041185418	-0.093057021	-0.2224513	-0.053842212	-0.129176494	-0.0150297	0.011478804	-0.065874706	0.059870553	0.026064557	-0.059690555	-0.020748628	0.026919233	-0.027622419	0.151916261	-0.05133455	0.269831896	0.047437181	-0.006969272	0.355897677	0.043300969	-0.031102673	0.496975378	0.015960234	-0.043355721	0.133502358	0.030135135	0.027490758	0.109749971
UF_21920	-0.170132359	-0.03482726	0.085878432	-0.267762538	0.20748814	-0.073408575	-0.20284693	0.162332414	-0.03652779	0.130070195	0.00109386	0.035926753	-0.155753194	0.041752376	0.101657716	-0.165349294	-0.193747766	-0.066225471	-0.185524174	-0.197555626	-0.049442766	-0.072408569	-0.243541064	-0.060940714	-0.144326498	-0.012265567	0.016113901	-0.051928385	0.073605534	0.024876202	-0.057180122	-0.002674521	0.044717958	0.006068828	0.161905013	-0.055293957	0.254599527	0.025495405	-0.000877806	0.337145442	0.043429808	-0.020090886	0.465376961	0.035111816	-0.048410269	0.157343543	0.008337479	0.031876517	0.115162057
UF_21930	-0.16507558	-0.073364654	0.068951068	-0.257188426	0.224371692	-0.063405013	-0.191300772	0.166842767	-0.036288866	0.110913879	-0.026349147	0.03554205	-0.147346165	0.017131782	0.094205041	-0.156516702	-0.163635885	-0.03333398	-0.159562206	-0.19503785	-0.034974379	-0.084410519	-0.212705725	-0.041039473	-0.129397709	-0.00602759	0.018767772	-0.061186312	0.064741897	0.030469	-0.064464201	-0.007917006	0.026499935	-0.063400381	0.172571415	-0.070335313	0.275738704	0.048139864	-0.004617438	0.371676362	0.042940223	-0.031294125	0.503477619	0.01253461	-0.030206128	0.134737481	0.017221788	0.019048511	0.097409829
UF_23606	-0.155681576	-0.040721989	0.103917212	-0.244410704	0.219288748	-0.094001591	-0.179061775	0.174405643	-0.032550506	0.123549997	-0.036364126	0.076180087	-0.130571561	0.026259556	0.112904623	-0.162445786	-0.198827098	-0.051017299	-0.193168693	-0.212108529	-0.043721708	-0.089098808	-0.244921789	-0.041170473	-0.159291793	-0.00719335	-0.005693275	-0.060142768	0.066648597	0.020924302	-0.076139422	-0.015404882	0.038773966	0.021023733	0.193710925	-0.05249172	0.267098348	0.020995633	-0.013865059	0.345706617	0.043556245	-0.031882205	0.448491695	0.087114184	-0.039419238	0.16020469	0.005306126	0.016335464	0.104985746
UF_3278	-0.173803327	-0.067965984	0.052444959	-0.239836126	0.197238582	-0.067525734	-0.189274493	0.181917276	-0.015593932	0.112577164	0.020628309	0.040171838	-0.145061693	0.081393304	0.109635073	-0.145816207	-0.18574725	-0.049651401	-0.166529473	-0.21056987	-0.049370198	-0.042448282	-0.239836502	-0.050974664	-0.186059342	-0.013353536	0.001137521	-0.084058884	0.068184918	0.038451754	-0.076245909	-0.007586524	0.046856331	-0.021381777	0.161532667	-0.054424664	0.283934232	0.017254352	-0.003354376	0.359519114	0.030090213	-0.033767957	0.465867944	0.026145797	-0.045298962	0.145327534	-0.02277356	0.003392005	0.108910719
UF_33261	-0.143081576	-0.083804671	0.056851087	-0.276955023	0.219403924	-0.085874353	-0.213396216	0.165759295	-0.038297485	0.121620118	0.017196699	0.082063171	-0.136862743	0.033627978	0.087661303	-0.14390327	-0.201530314	-0.081214191	-0.167730248	-0.209738989	-0.058174478	-0.059174281	-0.232073952	-0.058851371	-0.150165235	-0.007989041	0.006042735	-0.060851729	0.077337266	0.04704659	-0.062633364	0.016977361	0.058466711	-0.019801909	0.176032697	-0.060212859	0.267185754	0.015228993	-0.005732748	0.352608853	0.010913629	-0.054636017	0.438301168	-0.011512334	-0.077106373	0.138688738	0.035352216	0.070064127	0.102235171
UF_33262	-0.14949632	-0.016938733	0.107622728	-0.280616801	0.178475355	-0.087663781	-0.213128628	0.149235083	-0.039112463	0.128755599	0.012465054	0.082479107	-0.133188709	0.039015915	0.116309596	-0.16012615	-0.183828686	-0.07505972	-0.177098384	-0.216279201	-0.097159176	-0.071377077	-0.249586915	-0.089916666	-0.158362917	0.002589124	0.018244221	-0.050891022	0.088623039	0.043275082	-0.062853144	0.007447147	0.051713541	-0.006857201	0.149136621	-0.080345391	0.271767823	0.014931154	0.009835984	0.346585307	0.01006209	-0.025138386	0.427834359	0.015363388	-0.082979114	0.171249205	0.033859466	0.051075758	0.110976907
UF_36968_3	-0.189969043	-0.084006996	0.044736859	-0.264218818	0.178241751	-0.081490196	-0.196700442	0.159092824	-0.046205067	0.11711125	0.006819812	0.087511903	-0.082799261	0.081906362	0.09646986	-0.143433271	-0.161115688	-0.050290675	-0.179206552	-0.199751722	-0.051279404	-0.058924575	-0.231933516	-0.059222309	-0.175724061	-0.012330085	0.002371086	-0.08806923	0.068415919	0.043157111	-0.090035769	-0.017578618	0.040484983	0.023637671	0.190090035	-0.047714588	0.2946672	0.036172575	0.002116862	0.370016784	0.032173002	-0.045693293	0.445865761	0.029920266	-0.090687445	0.133955756	-0.01435028	0.056080579	0.101837379
UF_37223	-0.156592838	-0.087299863	0.055132617	-0.308508186	0.21884156	-0.073537872	-0.226809661	0.166310822	-0.050805956	0.092006784	0.026515989	0.083946341	-0.090757667	0.058195068	0.090503095	-0.130779994	-0.164970001	-0.063785332	-0.161564248	-0.179516814	-0.050448482	-0.028506624	-0.198146671	-0.059484508	-0.153948997	-0.028712903	0.016499668	-0.08173942	0.063906606	0.041083855	-0.081175694	-0.012229353	0.051416806	-0.022818813	0.158587062	-0.064194297	0.285211438	0.010049512	-0.003549004	0.374717498	0.002532964	-0.037860091	0.46297778	-0.009292134	-0.074410599	0.145011869	0.021913662	0.043568757	0.096127549
UF_39311	-0.16380505	-0.084086961	0.052740922	-0.267796432	0.220026939	-0.081635207	-0.197710506	0.178171462	-0.044618077	0.139079077	-0.014996469	0.075849081	-0.127887419	0.060988884	0.100871588	-0.159939343	-0.187134736	-0.052624224	-0.183266423	-0.190671921	-0.048027756	-0.073985795	-0.22631287	-0.047144149	-0.161499844	-0.009317317	-0.001012478	-0.049657806	0.062334139	0.045099536	-0.063759244	-0.011941481	0.058688429	-0.012222914	0.164551292	-0.074922694	0.280685522	0.03969147	0.003410148	0.353340155	0.041037861	-0.026538879	0.437994212	0.044256347	-0.066571031	0.144355926	0.002006332	0.029898421	0.107495861
UF_39480	-0.163872696	-0.083860674	0.053337047	-0.271682371	0.245103933	-0.066853861	-0.206005856	0.190102425	-0.042186796	0.130070955	0.043165174	0.094922101	-0.12860414	0.082032653	0.11080099	-0.117286644	-0.212204044	-0.074615643	-0.132078862	-0.243123201	-0.070140242	-0.016463659	-0.267974741	-0.070505556	-0.153867476	-0.034800853	-0.026030522	-0.070330684	0.0813395	0.033692529	-0.074314639	-0.001631327	0.045590363	-0.026049245	0.198012971	-0.0505875	0.243359262	0.026271395	0.001621187	0.309418222	0.004123273	-0.058194445	0.417079929	-0.061496156	-0.105518605	0.144794734	0.049657786	0.071235015	0.123050899
UF_39481	-0.16296195	-0.066746467	0.07009599	-0.271941153	0.22696274	-0.060521461	-0.197516097	0.188625419	-0.037976932	0.122863877	0.035487025	0.077024493	-0.108515546	0.093680314	0.101496731	-0.137894948	-0.213225613	-0.057226384	-0.153334594	-0.244158668	-0.074341781	-0.042684526	-0.256538656	-0.076355352	-0.150583861	-0.0323613	0.003950193	-0.077319653	0.073318682	0.03595353	-0.08383729	-0.014405591	0.045104637	0.000691915	0.183084336	-0.06435742	0.255832201	0.03317672	0.013221247	0.324172317	0.010755423	-0.031888558	0.425673377	-0.020235238	-0.08344811	0.146559712	0.034051011	0.049626566	0.115130905
UF_39501	-0.162958402	-0.096061917	0.065826264	-0.285258792	0.209564351	-0.0913715	-0.198380409	0.171917208	-0.054519482	0.109678112	0.033373596	0.079535052	-0.103559485	0.07133735	0.114800217	-0.137528266	-0.179150192	-0.061500711	-0.173575149	-0.214511167	-0.061625573	-0.04693697	-0.247624953	-0.086709096	-0.159590654	-0.027350878	0.004729233	-0.066196118	0.088004147	0.047564285	-0.070177027	0.000273922	0.053269527	-0.010810279	0.185006444	-0.058578369	0.253419275	0.020540185	0.006097424	0.329565801	0.011672437	-0.039170527	0.434779157	-0.003076721	-0.094679503	0.156142825	0.011619288	0.06771818	0.130100057
UF_39764	-0.164738789	-0.016265641	0.086954564	-0.268894666	0.204616679	-0.054502451	-0.18438196	0.160982987	-0.0049016	0.112772946	0.005101387	0.011583978	-0.103336506	0.060524425	0.064007673	-0.167732303	-0.191092899	-0.027948042	-0.195941007	-0.22958064	-0.026259451	-0.104840152	-0.243344842	-0.05177123	-0.142846542	-0.037805519	0.01005358	-0.069971464	0.062835708	0.006413266	-0.08544708	-0.012704107	0.017179408	0.001573973	0.185680088	-0.02478656	0.276442356	0.029768266	0.01136241	0.358558382	0.054390283	-0.000985596	0.483637196	0.041776595	-0.011133696	0.142753955	0.003795354	-0.000227895	0.117134138
UF_46136	-0.149506214	-0.081159457	0.070533116	-0.292247287	0.230097979	-0.078761318	-0.206202549	0.15483199	-0.039051624	0.112164184	8.13E-05	0.049550026	-0.130608849	0.047858263	0.074908951	-0.161007511	-0.166357579	-0.042136902	-0.176277194	-0.18270299	-0.042489052	-0.08349447	-0.222244128	-0.042666892	-0.129056275	-0.032161994	0.017489966	-0.070640838	0.073929413	0.030277812	-0.073505721	-0.014536228	0.030161821	0.000619102	0.17392494	-0.051606432	0.276249003	0.03058018	0.004351354	0.36890602	0.031656574	-0.027253556	0.46266838	0.028337742	-0.058769686	0.131346987	0.001518834	0.035390876	0.116285842
UF_46152	-0.168046836	-0.091912584	0.053506544	-0.261963129	0.252589315	-0.078412237	-0.172946659	0.19941967	-0.044011733	0.098274605	0.024203298	0.084360128	-0.070744101	0.064797868	0.103919331	-0.133497189	-0.203801881	-0.058434934	-0.160177141	-0.218997476	-0.050128627	-0.031182471	-0.242012456	-0.065533025	-0.16933244	-0.039425769	-0.000648567	-0.087167116	0.064459781	0.04045176	-0.07859218	-0.025571973	0.048346169	-0.038477504	0.194599587	-0.081728299	0.27190194	0.021851479	0.008099807	0.348429808	0.008511072	-0.038881181	0.429178598	0.021180807	-0.086811735	0.144589628	0.009089863	0.055857337	0.091327457
UF_47698	-0.167873909	-0.066942824	0.067272248	-0.271843989	0.212154446	-0.073848097	-0.179663412	0.163273161	-0.019112354	0.100012099	0.033020416	0.068184416	-0.120962604	0.062067327	0.094680219	-0.149454456	-0.189138445	-0.051018052	-0.16462739	-0.230956229	-0.057611698	-0.069147158	-0.246847113	-0.073675053	-0.159059299	-0.028951378	0.000772311	-0.069644504	0.078078806	0.03324774	-0.077953948	-0.010841423	0.031335359	0.003299506	0.161311425	-0.048273335	0.271742397	0.035864583	-3.13E-05	0.349624938	0.024231901	-0.044378749	0.456477079	-0.010936886	-0.072157287	0.134753632	0.032912147	0.061221771	0.116240433
UF_56833	-0.14675633	-0.046189077	0.079855682	-0.285243381	0.199272461	-0.062433903	-0.210236984	0.149330158	-0.029675979	0.095110667	0.036746685	0.057686333	-0.11942692	0.031873923	0.095269118	-0.164530028	-0.171491894	-0.041788595	-0.169691694	-0.205344617	-0.055068816	-0.073935336	-0.212485198	-0.051715311	-0.143240866	-0.019621472	0.001575075	-0.069908714	0.075163733	0.03358225	-0.075272166	-0.011836724	0.02280179	-0.011546782	0.154262602	-0.049685298	0.276766162	0.025992483	0.008891833	0.374315928	0.019444901	-0.024677923	0.495741861	-0.004575279	-0.056039345	0.135734871	0.018458821	0.043949949	0.088298399
UF_58094	-0.176946242	0.005613215	0.071653826	-0.258310219	0.185291597	-0.052487258	-0.212830947	0.15717352	-0.030878152	0.11784341	0.016943227	0.042869239	-0.105424599	0.103830441	0.084702555	-0.143940832	-0.176773483	-0.048362603	-0.178125889	-0.229345901	-0.080676447	-0.067668707	-0.273376751	-0.082923556	-0.164627484	-0.026583137	0.001004848	-0.075330943	0.068672934	0.031866425	-0.077288494	-0.004746201	0.044531156	-0.03109679	0.157778247	-0.0403257	0.251817181	0.025531943	0.000319788	0.343789426	0.033845873	-0.036188627	0.457782523	0.010234294	-0.049008533	0.164936317	0.014479478	0.047844108	0.148507852
UF_58550	-0.156501806	-0.079554911	0.065501291	-0.29316086	0.213115059	-0.076628379	-0.207455023	0.173209404	-0.035185734	0.088857753	0.011703646	0.025315208	-0.142695755	0.006036735	0.084531089	-0.165542759	-0.152303167	-0.034032139	-0.183029016	-0.17142094	-0.01915343	-0.060314237	-0.213064245	-0.033112112	-0.147499202	-0.022576328	0.010718215	-0.075454438	0.065320682	0.023308339	-0.080087997	-0.009469245	0.033602324	0.032882409	0.159656836	-0.033404792	0.288327305	0.019019103	-0.005842562	0.373277848	0.047306751	-0.024194053	0.485515185	0.029042419	-0.037838024	0.132655788	-0.000889506	0.025782863	0.122970379
UF_59099	-0.171296081	-0.102119383	0.074365905	-0.293049819	0.242214655	-0.099155994	-0.210888466	0.164285889	-0.054951451	0.158656725	-0.035241458	0.053346979	-0.132100949	0.028562272	0.120624923	-0.162788163	-0.14306945	-0.034106806	-0.179580133	-0.171713181	-0.045473807	-0.085299631	-0.210568031	-0.054673645	-0.155878001	-0.034033862	0.006204908	-0.042223789	0.06236111	0.035722493	-0.053090121	-0.022761499	0.046364752	-0.005451204	0.174895631	-0.09636543	0.274706006	0.042081254	0.008673559	0.343312517	0.043477153	-0.022126377	0.424691056	0.03310548	-0.055433539	0.169798939	0.019830989	0.049993596	0.116589839
UF_59126	-0.156225668	-0.08591517	0.084045181	-0.272962132	0.224442487	-0.069220505	-0.197979927	0.171788176	-0.029029592	0.110438611	0.003905215	0.016737201	-0.137181749	0.016033028	0.127937508	-0.160578668	-0.170929562	-0.026339929	-0.177783992	-0.188559317	-0.031445847	-0.084805802	-0.202591485	-0.041096678	-0.164475287	-0.028721256	-0.011395974	-0.072563235	0.068991922	0.006438822	-0.074117647	-0.018158838	0.011011449	0.009192653	0.162898286	-0.06930364	0.282309723	0.034108985	0.008615115	0.363112531	0.043352554	-0.011955876	0.467495847	0.035976195	-0.041172706	0.152932793	-4.06E-05	0.033240841	0.124834879
UF_59129	-0.14970931	-0.095864196	0.075424857	-0.263154601	0.252328618	-0.071997137	-0.200205915	0.179144923	-0.047467211	0.119519246	-0.00550947	0.04163743	-0.127191972	0.028074416	0.119016134	-0.157705985	-0.173248518	-0.039698346	-0.18145545	-0.19467951	-0.032392697	-0.083261204	-0.208219285	-0.043915859	-0.168435936	-0.027262411	-0.002976046	-0.06294445	0.048635951	0.027008549	-0.068845586	-0.016013804	0.033636961	0.014536253	0.151502365	-0.084090738	0.272013477	0.05036973	0.000226128	0.362151112	0.055163179	-0.018743957	0.453290788	0.039697322	-0.043847388	0.146972604	0.002553469	0.030816079	0.112004313
UF_59633	-0.180799344	-0.06726259	0.060651866	-0.255753035	0.210725027	-0.084932275	-0.167865042	0.188225812	-0.026232818	0.11711429	0.036949376	0.084494851	-0.125707919	0.094690707	0.109027202	-0.125667198	-0.208240666	-0.068084701	-0.142616127	-0.274050985	-0.086410339	-0.053094498	-0.270608052	-0.087044326	-0.16111299	-0.009122233	0.029420846	-0.080036431	0.093668515	0.044946833	-0.081046222	0.016793437	0.06172728	-0.002312773	0.185048941	-0.066057741	0.264780856	0.007560313	-0.003135799	0.327755044	0.015161042	-0.037431808	0.412337226	0.021665344	-0.092402685	0.164437669	0.008892757	0.053932217	0.08951874
UF_59850	-0.172739444	-0.073369892	0.061691993	-0.27810539	0.224158768	-0.063312529	-0.199916069	0.198533076	-0.024989527	0.1208728	0.053877348	0.075862127	-0.092024995	0.084980807	0.119177302	-0.11506665	-0.197769419	-0.055396467	-0.137598593	-0.26109365	-0.07062408	-0.028221697	-0.281753697	-0.068422807	-0.166766447	-0.005587461	-0.019521795	-0.093479636	0.095413387	0.021628933	-0.085548567	0.014077759	0.033269094	-0.013419086	0.182748911	-0.050020383	0.260120872	0.00999743	0.012329771	0.333608311	0.005175512	-0.035495026	0.407576721	-0.004849383	-0.082671076	0.165783424	0.002003167	0.058987826	0.100222367
UF_63459	-0.182825874	-0.109826492	0.041165568	-0.255756627	0.224957952	-0.092289572	-0.180348296	0.168489951	-0.048250044	0.128384168	-0.004197612	0.080830857	-0.150321009	0.01458907	0.10583924	-0.166419799	-0.17740912	-0.054522791	-0.18324822	-0.185175173	-0.035247701	-0.070250257	-0.211542148	-0.049168531	-0.157787677	-0.015608998	-0.001996583	-0.052706248	0.05988821	0.041182224	-0.059644521	-0.011028364	0.055128396	-0.02369108	0.179205546	-0.076700966	0.24372943	0.020025212	-0.009537564	0.355360102	0.044920133	-0.045775237	0.454427426	0.023259159	-0.080200179	0.169822234	0.023314932	0.063741138	0.12543635
UF_63460	-0.171638842	-0.116531377	0.057699076	-0.258258022	0.235522975	-0.047911822	-0.182779207	0.18819212	-0.019193631	0.102586638	0.011603837	0.049070719	-0.146180195	0.010673219	0.095247167	-0.154132775	-0.185835428	-0.042649699	-0.170033905	-0.19236479	-0.027341168	-0.060952086	-0.208099297	-0.015473011	-0.171927284	-0.015664239	-0.022280145	-0.07692676	0.06840534	0.003493016	-0.080056582	-0.002483598	0.027860693	-0.019018018	0.149394	-0.074471664	0.279363596	0.040903462	0.003587972	0.359361434	0.038317142	-0.026213271	0.471583134	0.013412556	-0.054435866	0.170234852	0.012189249	0.036681204	0.118699709
UF_7711	-0.157591697	-0.057539321	0.076725972	-0.284108931	0.21218489	-0.078947462	-0.195784258	0.155867604	-0.038860275	0.117171543	0.009137585	0.041416542	-0.123964231	0.028011144	0.114693739	-0.15470729	-0.16896244	-0.036092408	-0.17249463	-0.205274827	-0.073210397	-0.074983181	-0.217716061	-0.068081704	-0.145876162	-0.010200921	0.025729513	-0.074314016	0.06418288	0.023158263	-0.072785204	0.000836565	0.03946535	-0.018484631	0.148446626	-0.062649053	0.250419825	0.036249341	0.006129509	0.357885621	0.026209838	-0.026949525	0.489836208	-0.001301948	-0.058596112	0.1304596	0.03487002	0.046077327	0.121111133
UF_81573	-0.159239417	-0.062700755	0.068857948	-0.264970545	0.21026131	-0.071516723	-0.197642516	0.171205238	-0.042893227	0.115000438	-0.022810032	0.042095745	-0.143540968	0.025853937	0.09496459	-0.15399437	-0.167821835	-0.065598207	-0.172272604	-0.174036753	-0.033190425	-0.082830391	-0.195389223	-0.032496705	-0.14812681	-0.020915328	0.006334524	-0.053864006	0.04659904	0.03541066	-0.072680996	-0.029446075	0.042148865	-0.034258585	0.155971593	-0.068687804	0.278691428	0.045330411	-0.001034383	0.370984017	0.046220888	-0.041494572	0.50455291	0.009478252	-0.054069774	0.125802063	0.01697946	0.042845378	0.096490755
UF_84754	-0.176321558	-0.109758942	0.037284499	-0.271681283	0.199438597	-0.102186238	-0.191479048	0.183570989	-0.047230122	0.120243723	0.003772526	0.08468275	-0.114803453	0.071914706	0.097907328	-0.145546855	-0.17298067	-0.061345728	-0.160814753	-0.19728792	-0.060065217	-0.033252602	-0.215371718	-0.06641691	-0.13916572	-0.014182046	0.001820155	-0.076974393	0.061578899	0.066362802	-0.064713601	-0.023154405	0.05398328	-0.056596438	0.204122306	-0.062871618	0.270138428	0.033301047	0.005323437	0.343610398	0.002494481	-0.054779205	0.45316833	-0.020293114	-0.106493858	0.14389736	0.057304059	0.081329078	0.102600955
UF_85084	-0.140864276	-0.091149495	0.033699014	-0.318245312	0.185120398	-0.075949484	-0.235302991	0.149840612	-0.045411629	0.13190289	0.028543477	0.104478471	-0.06300373	0.107487998	0.08366905	-0.143717829	-0.186741574	-0.056306171	-0.172327215	-0.221664109	-0.0714689	-0.049883962	-0.235389362	-0.093711082	-0.157854829	0.006166278	-0.004706481	-0.056686306	0.08218989	0.050823885	-0.060088426	0.000166696	0.046033054	-0.0238399	0.192556571	-0.051872599	0.258911959	0.01769846	0.016347709	0.334826075	-0.000110865	-0.035579138	0.443523503	-0.03674372	-0.097028209	0.143069815	0.028842656	0.071276866	0.096927386
UF_85085	-0.164824357	-0.067738081	0.046093042	-0.285980188	0.192231312	-0.081687675	-0.203001934	0.163003782	-0.037705333	0.144062351	-0.012080834	0.052153979	-0.127465707	0.091685703	0.066631876	-0.160898687	-0.177611613	-0.042349732	-0.198033978	-0.203703372	-0.061330805	-0.105470074	-0.245792777	-0.07543071	-0.135908095	-0.001148775	0.030018398	-0.03403703	0.052166766	0.05563649	-0.053862864	-0.012280502	0.062594755	-0.008461786	0.161526487	-0.057097667	0.262083361	0.037402693	0.008539607	0.348515528	0.045376467	-0.023507304	0.455704916	0.032024303	-0.054678393	0.15109974	0.011983681	0.036867435	0.107994939
UF_85087	-0.156249262	-0.088808253	0.048380683	-0.290312858	0.207999371	-0.077167213	-0.227315816	0.179264748	-0.031242016	0.115338438	0.043972978	0.070789545	-0.08928909	0.088236492	0.103828026	-0.13202098	-0.197501102	-0.062369143	-0.147979348	-0.227101662	-0.057307249	-0.031250243	-0.256040624	-0.058328973	-0.178923536	-0.004211735	-0.016552951	-0.075871865	0.0912496	0.036396837	-0.077685139	0.004918258	0.02827101	0.007523594	0.187015309	-0.029177914	0.272387961	0.015151939	0.007025537	0.341898087	0.008901866	-0.033459551	0.423411436	-0.009000921	-0.091506032	0.142007367	-0.014737673	0.057320551	0.112144939
UF_86733	-0.149181925	-0.04379463	0.083365427	-0.322178102	0.211012354	-0.10128894	-0.260264077	0.166745157	-0.073138522	0.151878044	0.019115115	0.086623958	-0.152035557	0.049003349	0.09447698	-0.139560418	-0.172280606	-0.089021432	-0.161797068	-0.175171802	-0.078472559	-0.025154582	-0.219061978	-0.08510465	-0.140431672	-0.031705119	0.039019296	-0.044506645	0.067623057	0.055769907	-0.057697281	-0.015016828	0.057210088	-0.026177237	0.168655616	-0.057573705	0.255540261	0.042386745	0.009280542	0.325757167	-0.001361791	-0.052240701	0.415763209	-0.056775997	-0.094769298	0.164950971	0.034274589	0.07392407	0.140585867
UF_86737	-0.149754961	-0.03466767	0.076257105	-0.330582807	0.185447864	-0.100068961	-0.260223481	0.153072427	-0.055371192	0.142529948	0.029434242	0.099314505	-0.141317646	0.056513387	0.079028712	-0.143713692	-0.143716294	-0.081623066	-0.160467409	-0.158911375	-0.084401396	-0.026570424	-0.184803385	-0.079128336	-0.141873751	-0.044482967	0.025006355	-0.056403205	0.056907409	0.056797577	-0.062040946	-0.02479639	0.058667084	-0.032129255	0.141657839	-0.061171547	0.266962705	0.026364079	0.001296506	0.341259093	-0.003105437	-0.056191467	0.469233492	-0.060927687	-0.108008545	0.150615905	0.039561119	0.086374614	0.123608555
UF_86742	-0.153629635	-0.071813112	0.072430101	-0.324068473	0.183107182	-0.101813312	-0.257504395	0.153124114	-0.057291982	0.12472524	0.030977513	0.106714915	-0.164057688	0.050875241	0.084552026	-0.131620434	-0.149779108	-0.068654649	-0.143518108	-0.160388737	-0.097782987	-0.006584991	-0.198181252	-0.073426856	-0.142862458	-0.023274427	0.035815635	-0.057661247	0.074170769	0.053035779	-0.072259028	-0.00074272	0.058840246	-0.020508417	0.162221794	-0.049303265	0.264332549	0.016925569	-0.002846262	0.332605021	-0.005563118	-0.060787621	0.475303127	-0.071487735	-0.117209584	0.152416239	0.027251221	0.082393896	0.110543026
UF_90465	-0.176870553	-0.009891428	0.07444696	-0.26316475	0.224542126	-0.060890096	-0.213433308	0.199344961	-0.03316559	0.126049153	0.025963148	0.069681641	-0.123748506	0.110062928	0.099192446	-0.099533434	-0.187115115	-0.044546681	-0.126891485	-0.263960852	-0.106140513	-0.022878073	-0.296485336	-0.080048898	-0.164215863	-0.014943022	0.001793063	-0.063331912	0.055310114	0.047668221	-0.08478062	-0.011706871	0.042115256	-0.040915583	0.174418079	-0.047251275	0.244620573	0.037442437	0.018039275	0.325135936	0.017955908	-0.047088063	0.428050787	-0.044860945	-0.089043864	0.142469416	0.035090759	0.046561747	0.124500921
UF_90466	-0.177663623	-0.010500417	0.094652554	-0.241588358	0.202163842	-0.0683158	-0.197781543	0.165378197	-0.04532031	0.102195912	0.020238525	0.048205391	-0.131358348	0.088241578	0.070138957	-0.142361017	-0.168230992	-0.036867509	-0.180769392	-0.22266266	-0.079437604	-0.073997493	-0.274499941	-0.085716964	-0.15085493	-0.054294973	0.033448399	-0.065459678	0.055344078	0.047496348	-0.077584293	-0.024902965	0.040156919	-0.019185311	0.175734132	-0.031553139	0.259696863	0.038965302	0.002065335	0.353017761	0.038494999	-0.027664521	0.459502128	0.009030455	-0.059036618	0.150006193	0.023069494	0.028991379	0.12952338
UF_90929	-0.146759917	-0.065865774	0.073802495	-0.315553726	0.215402921	-0.09703027	-0.246421699	0.181856772	-0.05299173	0.144423602	-0.007173947	0.069830828	-0.132016438	0.021721136	0.097687339	-0.134686547	-0.184679986	-0.070842044	-0.159640238	-0.202849696	-0.056169206	-0.049652014	-0.21576735	-0.064628093	-0.150360719	0.00431886	-0.00082907	-0.047629418	0.080953718	0.048790399	-0.051086104	0.005526021	0.058639012	-0.012382265	0.170730366	-0.050578471	0.261478725	0.022500338	0.006323746	0.332816402	0.019741675	-0.036208911	0.431513824	-0.020772281	-0.072361516	0.166562137	0.027668268	0.038309691	0.104548174
UF_90934	-0.153463467	-0.066182774	0.062597795	-0.281285606	0.203425479	-0.083693151	-0.213956038	0.18253198	-0.050173375	0.130319877	0.036444853	0.092035797	-0.101851476	0.093768115	0.091006892	-0.141668876	-0.207624082	-0.066710681	-0.152653317	-0.2710127	-0.093032496	-0.053075039	-0.264452337	-0.100320515	-0.135965524	-0.00045693	0.011264547	-0.067490695	0.09433362	0.053599315	-0.073662054	0.01450198	0.057496055	-0.008054914	0.182432117	-0.049085818	0.266276318	0.01022995	0.004899739	0.320802273	-0.000510839	-0.044020317	0.394802806	-0.003748267	-0.103445838	0.165703472	0.019816888	0.076633164	0.111059326
UF_90936	-0.162951249	-0.03622704	0.077266203	-0.277696075	0.223000672	-0.077596728	-0.219469895	0.193562003	-0.055160007	0.122705875	0.013029717	0.09021462	-0.090089093	0.084226212	0.094855702	-0.125015827	-0.204405713	-0.075975181	-0.146659029	-0.242783258	-0.08195932	-0.035559052	-0.270752774	-0.087345744	-0.157999956	-0.010926165	0.018838465	-0.064294724	0.076602953	0.043952715	-0.069133059	0.003193148	0.05480681	-0.013613277	0.174135614	-0.061375567	0.265585399	0.013702757	0.001227796	0.323812209	0.00810946	-0.038748993	0.415026696	0.008058309	-0.100598535	0.144953507	0.02054511	0.077538834	0.096956259
UF_90968	-0.15633984	-0.108488763	0.046027009	-0.275893374	0.220100842	-0.064081064	-0.18476529	0.181362879	-0.037813091	0.096609521	0.023165801	0.093581543	-0.056171039	0.106011616	0.108778806	-0.141699154	-0.189347194	-0.073005539	-0.155441192	-0.221225303	-0.070509278	-0.011752686	-0.226421512	-0.0630766	-0.15798076	-0.025160418	-0.00814399	-0.112870623	0.078125857	0.035457164	-0.097222682	-0.009024025	0.045253724	-0.03993401	0.169104676	-0.084771609	0.277678638	0.023977687	0.007418882	0.354909023	0.004013678	-0.037593191	0.44382449	-0.011013211	-0.104560911	0.154167863	0.025314877	0.066827866	0.083220789
UF_90983	-0.126475919	-0.121912313	0.034477197	-0.293856826	0.227946687	-0.066193104	-0.235937012	0.183421946	-0.037632542	0.082544167	0.059539801	0.059208814	-0.120812797	0.030961106	0.104221851	-0.12507572	-0.189711754	-0.056890948	-0.145456995	-0.215045184	-0.049128278	-0.042528024	-0.21762017	-0.044984578	-0.159399716	-0.002611032	-0.003282595	-0.092380681	0.087882748	0.025095224	-0.083700443	0.001181318	0.033683471	0.004174236	0.167535314	-0.04555134	0.270212439	0.018948802	0.011178063	0.351427653	0.000513039	-0.042031383	0.455023406	-0.039918787	-0.087453812	0.133602669	0.012275309	0.058984588	0.136716737
UF_90987	-0.14755763	-0.101891897	0.045392456	-0.297947392	0.217204786	-0.09181631	-0.240069315	0.182795342	-0.066071245	0.124337743	0.005679399	0.084077722	-0.128424521	0.041135688	0.107332107	-0.141921475	-0.180024318	-0.058801111	-0.160778393	-0.183363987	-0.039842669	-0.053526865	-0.205200236	-0.051163589	-0.152822257	0.007521474	-0.000624207	-0.064317473	0.052491284	0.036234323	-0.060525487	-0.020352299	0.048758914	-0.005099543	0.181904605	-0.03758925	0.250839586	0.02125404	0.003667601	0.344692661	0.011831925	-0.039666951	0.458188297	-0.005443053	-0.087317649	0.146975663	0.02103681	0.047511547	0.117841979
UF_90991	-0.157813876	-0.081554206	0.034875769	-0.296921832	0.214921142	-0.110768428	-0.235850918	0.169353775	-0.066369653	0.136207401	0.0060684	0.091872757	-0.140157468	0.029695253	0.09698902	-0.140577198	-0.174445401	-0.06593973	-0.161676862	-0.186596118	-0.048802781	-0.051219513	-0.202898665	-0.064435087	-0.147726468	-0.017291205	0.021226275	-0.054921639	0.066787037	0.051727028	-0.067259983	-0.009187576	0.055940768	-0.002186328	0.188831001	-0.038763889	0.256829344	0.026697589	0.000899571	0.335967296	0.012319891	-0.055056557	0.44703909	-0.015547636	-0.103830648	0.147744966	0.024869227	0.061433413	0.11936983
UF_91225	-0.137574866	-0.072552134	0.060149692	-0.301566689	0.220750703	-0.073617182	-0.193862629	0.160220111	-0.03020656	0.115428371	0.031800274	0.070729805	-0.095880202	0.060909958	0.111476771	-0.160472267	-0.191217402	-0.064017908	-0.171438499	-0.212834179	-0.061532894	-0.068402129	-0.241912542	-0.064708171	-0.142567868	-0.016687653	-0.00427086	-0.073140365	0.067446024	0.018216255	-0.07277557	-0.000917902	0.03374339	-0.025365746	0.161901774	-0.05993984	0.275794758	0.014561989	0.011692658	0.35682667	0.016794077	-0.034161183	0.435136976	0.001192069	-0.067115858	0.148471441	0.027461238	0.055682355	0.119606671
UF_91238	-0.158518497	-0.076264942	0.096238939	-0.296707782	0.215090721	-0.102685624	-0.222398971	0.174175274	-0.046247203	0.11561116	0.024169051	0.063319154	-0.141297079	0.02469821	0.111334991	-0.161769571	-0.184745973	-0.062285438	-0.18395347	-0.206693591	-0.070836638	-0.058763969	-0.240116287	-0.067571176	-0.129946307	-0.003690849	0.02298979	-0.062550781	0.085587471	0.028099768	-0.073145777	-0.00596866	0.041755661	0.038913931	0.159843139	-0.054498054	0.256724691	0.016687357	0.018888152	0.325493608	0.030479717	-0.034449871	0.422129666	0.015838207	-0.083998161	0.174934668	-0.005327717	0.061739027	0.136280844
UF_91239	-0.144864085	-0.089324355	0.053240812	-0.294120149	0.212603496	-0.120296591	-0.23115625	0.186524769	-0.061023577	0.111731382	0.018829687	0.07544152	-0.141446219	0.038077734	0.083189494	-0.159109115	-0.161315665	-0.055640364	-0.18248718	-0.178756141	-0.055330789	-0.060203305	-0.229415153	-0.068262873	-0.118682914	-0.030211009	0.029597254	-0.039002242	0.06112552	0.052168314	-0.05450503	-0.0284843	0.053900496	-0.011094427	0.203541631	-0.046597628	0.24692428	0.041649298	0.011292471	0.33131458	0.026094844	-0.055746595	0.44667679	-0.007716052	-0.095461878	0.154237298	0.001291446	0.06700054	0.127952449
UF_91245	-0.161391728	-0.049753658	0.060406557	-0.301065404	0.239648263	-0.061808585	-0.220500974	0.168977431	-0.036181724	0.117083047	0.023355001	0.086989878	-0.119418244	0.078110972	0.088988144	-0.126402122	-0.191413985	-0.060897708	-0.142984233	-0.222042417	-0.063802963	-0.028810727	-0.243765541	-0.075690395	-0.135086879	-0.02176032	-0.002233167	-0.065735669	0.0474886	0.027703911	-0.065219349	-0.009855322	0.046871202	-0.030390719	0.168495492	-0.053879398	0.24594914	0.035614893	0.008132991	0.338557893	0.011985555	-0.039913757	0.465203687	-0.056045537	-0.088586173	0.130393411	0.035944652	0.062104615	0.089437941
UF_91246	-0.156539502	-0.063187939	0.065075499	-0.30291032	0.227832682	-0.06549783	-0.198191096	0.173068101	-0.029792953	0.091036316	0.042260634	0.078370748	-0.117400965	0.053554089	0.111295688	-0.123017183	-0.18036909	-0.063417858	-0.151785133	-0.206813916	-0.04761626	-0.037755241	-0.226192267	-0.074329022	-0.139842149	-0.029052689	0.000122763	-0.082991969	0.065651933	0.025958128	-0.083112571	-0.007478959	0.032458022	-0.020970537	0.156546393	-0.072710161	0.269380815	0.020103759	-0.007288469	0.352069989	0.009085013	-0.051192928	0.472837545	-0.024617356	-0.06825933	0.140773083	0.019471742	0.06569539	0.087254823
UF_91248	-0.158570618	-0.064879783	0.059147032	-0.276239047	0.224719631	-0.090415981	-0.194432288	0.145552668	-0.052363488	0.108370017	0.008662457	0.052620884	-0.106690938	0.035382352	0.100719257	-0.177564186	-0.166897233	-0.047853799	-0.191114684	-0.189049665	-0.038416528	-0.091827334	-0.208162097	-0.04937761	-0.134870284	-0.035296305	0.022976024	-0.069423053	0.049310395	0.041430613	-0.067602066	-0.01985914	0.040405997	-0.011923322	0.167083367	-0.04159876	0.265592839	0.034214066	-0.007365531	0.3645858	0.042830381	-0.028940564	0.486384192	0.031755414	-0.047599813	0.145999127	0.008203007	0.030322392	0.116656093
UF_91267	-0.17761431	-0.077223056	0.042427834	-0.275865649	0.215338903	-0.091706324	-0.170481634	0.170403082	-0.041519807	0.113523688	-0.039570123	0.074383971	-0.085619225	0.079047391	0.078332378	-0.147998077	-0.168622504	-0.04397818	-0.183588578	-0.201559511	-0.052239983	-0.075190359	-0.205463236	-0.058935584	-0.142609803	-0.01070192	0.015246106	-0.060194254	0.057118595	0.060465366	-0.06904995	-0.013806642	0.063819683	-0.043828044	0.182900134	-0.088403246	0.275352769	0.043476949	-0.001528202	0.368041906	0.050658191	-0.046087767	0.473897208	0.05102456	-0.067340211	0.117184709	-0.004159767	0.032955748	0.09831361
UF_91294	-0.156747772	-0.112542577	0.069418823	-0.26518226	0.236691879	-0.063991584	-0.202892076	0.193356007	-0.041078546	0.12227581	0.017109371	0.059847385	-0.126359307	0.029882741	0.110027556	-0.161778151	-0.20128868	-0.050386019	-0.171686108	-0.21183553	-0.032059018	-0.054976075	-0.232470412	-0.038419014	-0.157249351	-0.008039471	-0.017766244	-0.069247655	0.067371164	0.004629571	-0.076105482	-0.010691547	0.024676184	-0.010788131	0.192289759	-0.059474866	0.270632982	0.031406236	0.009716476	0.338811593	0.02430723	-0.022873766	0.423672541	0.012237037	-0.065752259	0.169546785	0.010745681	0.053877002	0.128582931
UF_91295	-0.18147673	-0.089499351	0.06629017	-0.265602274	0.225806151	-0.070345018	-0.194851132	0.169339688	-0.042274701	0.132738997	-0.008818874	0.047012625	-0.134606418	0.028325425	0.108580463	-0.170177213	-0.189378615	-0.046920823	-0.185832738	-0.197808953	-0.031998231	-0.081264969	-0.233917056	-0.043781618	-0.156256477	0.016633917	-0.010834782	-0.053517013	0.066295165	0.020530278	-0.064932078	-0.013702957	0.032981372	-0.003689392	0.159243399	-0.063788144	0.267480361	0.037025502	0.008051475	0.343364532	0.041215143	-0.021981997	0.442505848	0.045147551	-0.058749099	0.172202973	0.004985271	0.045736581	0.129749119
Uller_Ac1	-0.141189505	-0.033652118	0.093362642	-0.312513143	0.21095086	-0.074829869	-0.23739686	0.168510014	-0.044367479	0.092200827	0.023587759	0.088872714	-0.128468736	0.034653071	0.123410929	-0.111517739	-0.172244647	-0.088681384	-0.133330438	-0.176448135	-0.066590907	-0.036899307	-0.195398998	-0.058845973	-0.133472241	-0.030508371	-0.006818212	-0.07446961	0.076534976	0.020003492	-0.068140305	-0.012054454	0.040185915	-0.068047242	0.17003229	-0.08128616	0.270370843	0.01694936	-0.000491466	0.355226015	1.64E-05	-0.035277101	0.47441308	-0.049699721	-0.087962996	0.15459317	0.014625256	0.054495299	0.104908858
Uller_Ac10	-0.15629885	-0.094657186	0.082465274	-0.283195491	0.231424415	-0.072144949	-0.22279628	0.185899943	-0.054818374	0.105738782	0.009878739	0.057286164	-0.144285524	0.013600745	0.113885748	-0.14080122	-0.177122307	-0.054474641	-0.166728153	-0.182811988	-0.043516442	-0.07032569	-0.206348823	-0.038791455	-0.13087096	-0.022955467	-0.000142634	-0.056566673	0.083173378	0.020799657	-0.070885688	-0.014427333	0.035045577	-0.011651121	0.166442736	-0.073180937	0.277049206	0.004683767	-0.000760643	0.352627904	0.016443353	-0.029259261	0.455641416	0.032868342	-0.061745106	0.15232361	0.003034621	0.03485992	0.117813066
Uller_Ac102	-0.157904966	-0.055970959	0.084306865	-0.291241376	0.23174891	-0.070770197	-0.226737761	0.180272222	-0.053559604	0.126654047	-0.04295483	0.027220416	-0.131580828	0.002502973	0.092670807	-0.186776336	-0.176882822	-0.03123987	-0.201774073	-0.187135127	-0.021310073	-0.105027409	-0.206218043	-0.021576065	-0.132926066	-0.019383572	0.004885128	-0.044457437	0.050438704	0.00965114	-0.059227814	-0.02329659	0.022202963	0.019769829	0.176215382	-0.04340208	0.268657514	0.03406331	-0.001240219	0.345165882	0.051562188	-0.009140068	0.4538537	0.068968208	-0.008257529	0.180053087	0.003013111	0.001660426	0.140601706
Uller_Ac11	-0.135207706	-0.086905978	0.085845608	-0.282253959	0.24759332	-0.063876117	-0.226044189	0.195470814	-0.034192514	0.095478549	0.056744989	0.064512592	-0.120736259	0.003862848	0.123812222	-0.128203269	-0.189575374	-0.054927357	-0.137251332	-0.206888302	-0.057047762	-0.038792642	-0.212028338	-0.029739072	-0.160170172	-0.025091316	-0.025328642	-0.090588647	0.072629437	0.003306463	-0.087623971	0.00093004	0.025595089	-0.022503142	0.170275375	-0.063162524	0.264718035	0.012413824	-0.002691245	0.340613222	0.004293997	-0.03957548	0.464182796	-0.01055454	-0.05876507	0.155626115	-0.008465843	0.04389546	0.128240894
Uller_Ac110	-0.126911004	-0.086105674	0.080506665	-0.291842931	0.227595873	-0.07441795	-0.235508772	0.179109913	-0.048766785	0.105081876	0.0380003	0.061466154	-0.128439514	0.031695723	0.131774977	-0.137300631	-0.177484569	-0.063830166	-0.150850891	-0.19079262	-0.052512456	-0.052897391	-0.203473984	-0.068320248	-0.154250145	-0.026752065	-0.001835855	-0.075974645	0.088446961	0.016315437	-0.078058099	-0.024329592	0.046300382	-0.021286036	0.147460675	-0.074695547	0.273767847	0.017866483	0.003359713	0.336136061	0.007035854	-0.036892081	0.457766339	-0.023210117	-0.063220114	0.165986214	0.02353423	0.048148009	0.125789108
Uller_Ac112	-0.15211767	-0.052980164	0.089438965	-0.310370118	0.249377479	-0.101715796	-0.246385785	0.198586858	-0.075065586	0.155234784	-0.01937095	0.088674683	-0.134206974	0.026093118	0.11415708	-0.135624843	-0.178501766	-0.066678476	-0.161399656	-0.200595269	-0.063190237	-0.057929205	-0.22417043	-0.076760047	-0.119577856	-0.030151164	0.012275537	-0.036162829	0.068106039	0.038744518	-0.053727066	-0.032576369	0.050489407	-0.036162974	0.190355112	-0.080440089	0.245167932	0.036243509	0.012080426	0.308713516	0.01998172	-0.036465858	0.400911379	-0.017887779	-0.080993588	0.172841233	0.044593613	0.046603738	0.144450586
Uller_Ac113	-0.135932853	-0.06768476	0.098220147	-0.291781238	0.202707794	-0.081043549	-0.229808635	0.148552691	-0.049508793	0.112194993	0.003831452	0.066356673	-0.126672551	0.032045764	0.100532685	-0.162084901	-0.144492133	-0.062184099	-0.177443072	-0.159425519	-0.053634836	-0.061381776	-0.178846918	-0.083707762	-0.132475731	-0.022810379	0.022619238	-0.07635436	0.069972466	0.028594516	-0.086280098	-0.008127094	0.034822646	-0.032902448	0.098223547	-0.080307831	0.272201622	0.016866361	-0.020106056	0.351858463	0.020593027	-0.055374042	0.517649494	0.007757427	-0.051209158	0.16021696	0.022377273	0.069443861	0.119295205
Uller_Ac118	-0.162440605	-0.051995156	0.095455005	-0.250069415	0.238441475	-0.072478826	-0.194930994	0.177356091	-0.049431452	0.138190242	-0.00676611	0.019940594	-0.136891602	0.001803806	0.101433617	-0.177249047	-0.188919928	-0.046805676	-0.198853668	-0.196267229	-0.044039687	-0.104602803	-0.220257394	-0.014844814	-0.133599198	-0.041362317	0.000268103	-0.057008773	0.059930476	0.016548266	-0.074483677	-0.028745249	0.026312453	-0.012497867	0.188693162	-0.060981061	0.284300821	0.033857772	0.017966419	0.345038756	0.052162109	-0.006671578	0.436581899	0.065131481	-0.040928775	0.187887104	-0.008523993	0.009960802	0.125951168
Uller_Ac120	-0.15479113	-0.061171574	0.097526121	-0.308670198	0.194483512	-0.105822742	-0.240718971	0.161630186	-0.07046825	0.135438166	-0.018391849	0.063917089	-0.135990667	0.014394262	0.099411336	-0.166390597	-0.144017109	-0.0569307	-0.185275785	-0.165913265	-0.052800781	-0.095980078	-0.171758046	-0.073430086	-0.120412062	-0.017015314	0.028290139	-0.040080659	0.065469216	0.048760131	-0.056865782	-0.016361668	0.044878526	-0.018079731	0.145335275	-0.072280379	0.270643688	0.023719215	0.001121656	0.352527345	0.042560983	-0.044959093	0.467730604	0.020884329	-0.054384945	0.167052864	0.012214399	0.047380202	0.130506764
Uller_Ac122	-0.156384179	-0.069395178	0.095058657	-0.299743834	0.224203263	-0.074049956	-0.221534849	0.155125979	-0.050866735	0.114919109	0.013014555	0.059668024	-0.126553797	0.031027186	0.125653581	-0.143366464	-0.150399121	-0.066388582	-0.163155182	-0.170168671	-0.058905243	-0.069943474	-0.190172946	-0.058666395	-0.14755552	-0.022649777	0.019201261	-0.067087123	0.057060963	0.018767281	-0.073595875	-0.017513542	0.039431303	-0.029778176	0.13441671	-0.09781017	0.275187795	0.032692538	-0.003354373	0.355691646	0.028307155	-0.037402338	0.470709475	-0.001415867	-0.050369349	0.161280133	0.010911409	0.04389793	0.136691799
Uller_Ac14	-0.171611399	-0.097053322	0.049750367	-0.265592594	0.209508184	-0.097414732	-0.218076863	0.163731617	-0.071398748	0.13300434	-0.035072674	0.080257144	-0.14967365	0.021798303	0.079198793	-0.162952757	-0.157705126	-0.055745545	-0.187451299	-0.170436754	-0.045082042	-0.089133832	-0.199256574	-0.047844633	-0.126595158	-0.01384819	0.036273493	-0.031943366	0.066271202	0.045409413	-0.057187976	-0.023678208	0.058007975	-0.024355792	0.181457524	-0.059590408	0.260440623	0.03725794	0.002387726	0.348952571	0.050437448	-0.045621188	0.473731005	0.022413151	-0.076280269	0.154676954	0.01267433	0.037793357	0.122348972
Uller_Ac15	-0.159293672	-0.058303565	0.066426672	-0.298099816	0.226249407	-0.082956135	-0.238439312	0.180069046	-0.059560729	0.132765026	-0.026881161	0.081223342	-0.15075204	0.046963036	0.103426766	-0.136937459	-0.166465128	-0.060778752	-0.158719937	-0.187860254	-0.055227372	-0.062768296	-0.208472488	-0.063489193	-0.116002194	-0.025129733	0.01388827	-0.031175926	0.064925047	0.040598211	-0.044069912	-0.02509311	0.032424029	-0.038110701	0.176049861	-0.078278833	0.250543042	0.058301558	0.000151655	0.339508898	0.034761165	-0.042725544	0.456593148	-0.026502623	-0.080201331	0.139049773	0.037644702	0.047718619	0.125215849
Uller_Ac16	-0.158610747	-0.070877616	0.08425023	-0.302766867	0.216923439	-0.087189089	-0.232567624	0.173662324	-0.074127048	0.121000706	-0.007424034	0.078208593	-0.119697513	0.008998714	0.095689415	-0.156799006	-0.159186159	-0.048094175	-0.155566589	-0.177381631	-0.06478442	-0.076143722	-0.196854245	-0.048350089	-0.140113993	-0.023020915	0.018509301	-0.056113276	0.072748468	0.035117651	-0.065634579	-0.014140785	0.048794201	-0.00444849	0.173324139	-0.061016655	0.283460574	0.014600028	-0.010210682	0.350177733	0.034442432	-0.042125176	0.457867704	0.02072496	-0.058024167	0.137940114	-0.009296353	0.031924148	0.120306302
Uller_Ac17	-0.171439251	-0.103096086	0.080510438	-0.275529553	0.229153946	-0.078414267	-0.205244905	0.168802316	-0.047266121	0.108198262	0.005344575	0.037807061	-0.141209351	0.011868673	0.122195634	-0.165601417	-0.170795934	-0.03788792	-0.178951884	-0.184437996	-0.036576248	-0.095196597	-0.200543542	-0.037708432	-0.137223943	-0.026399722	0.021628393	-0.065339035	0.059910501	0.011877835	-0.066331714	-0.005171252	0.032962601	0.015675603	0.167550731	-0.058519994	0.279453727	0.02241055	-0.014906391	0.355750732	0.040419272	-0.020267944	0.465253346	0.043735525	-0.02069681	0.153821764	0.005498081	0.011340564	0.135571947
Uller_Ac2	-0.156586203	-0.100356207	0.074768041	-0.28137954	0.237454137	-0.05770496	-0.219881316	0.174833175	-0.038138738	0.107124409	0.01644519	0.04449733	-0.153148121	0.039852987	0.125387506	-0.135505698	-0.179516735	-0.052726224	-0.155831143	-0.195829214	-0.037548753	-0.062064832	-0.204199162	-0.037181564	-0.146506531	-0.029791731	-0.002757341	-0.073832319	0.079931977	0.010977872	-0.079778824	-0.008000743	0.024270919	0.001029546	0.168059399	-0.070748693	0.266469404	0.012734918	-0.006477347	0.34441154	0.021262147	-0.026704614	0.466623125	0.015839169	-0.039517601	0.156970969	-0.003504626	0.018102629	0.12996799
Uller_Ac24	-0.157180945	-0.06420702	0.077691026	-0.273005245	0.253875805	-0.082851158	-0.220683109	0.203753375	-0.06382154	0.138067331	-0.026916233	0.063395064	-0.151219502	0.028742873	0.113828867	-0.151399484	-0.186840002	-0.062759869	-0.173526977	-0.186782551	-0.047938287	-0.074668113	-0.231149358	-0.040440089	-0.140318387	-0.03388177	0.016835055	-0.039274518	0.053832842	0.027934796	-0.056648897	-0.026538478	0.04019931	-0.018340537	0.183027191	-0.088846236	0.270171278	0.037168025	0.01031063	0.335179034	0.045637367	-0.025956221	0.406919693	0.035018772	-0.063603474	0.154139228	0.013553083	0.020208859	0.143618384
Uller_Ac29	-0.167369732	-0.068562371	0.087092591	-0.303518892	0.195048883	-0.094439245	-0.225958203	0.172698078	-0.051208324	0.149710061	-0.005915725	0.068166568	-0.14466077	0.026514014	0.101172872	-0.147074247	-0.167068421	-0.074122596	-0.167201113	-0.176639702	-0.056371579	-0.065347901	-0.193808211	-0.081549647	-0.124186756	-0.017854079	0.022754191	-0.04765922	0.082201132	0.043881674	-0.06086148	-0.006860832	0.051969687	-0.044435736	0.156655228	-0.089661528	0.270784255	0.033180731	0.006007906	0.329091666	0.019707443	-0.03201809	0.458033444	-0.018439491	-0.08148671	0.161801757	0.031788217	0.057671872	0.127253507
Uller_Ac3	-0.156275899	-0.046309901	0.103967534	-0.31106578	0.213381645	-0.081614935	-0.238272008	0.168264573	-0.055427761	0.102015516	0.02750919	0.06798828	-0.121212237	0.046008821	0.126228449	-0.126213413	-0.175639537	-0.083604359	-0.15333874	-0.18509716	-0.056848745	-0.052217777	-0.194723664	-0.057451355	-0.14983721	-0.032147956	-0.003603262	-0.071245965	0.077396362	0.020236854	-0.066504329	-0.016971457	0.034408533	-0.03123638	0.168672129	-0.065506129	0.274686262	0.002819831	0.016995539	0.342130952	0.011522709	-0.033738915	0.444588071	-0.0071971	-0.079098176	0.177045846	-0.005781734	0.052546066	0.130288273
Uller_Ac33	-0.166099796	-0.097297588	0.065760894	-0.261852994	0.235808203	-0.080683999	-0.218360315	0.178838074	-0.059099017	0.146943531	-0.026735076	0.045210006	-0.159322995	0.024129473	0.093476924	-0.187118554	-0.169197683	-0.031261224	-0.193063202	-0.19019273	-0.033852832	-0.094442662	-0.214698782	-0.044986021	-0.129487356	-0.017468746	0.01081255	-0.034557448	0.056187841	0.027241654	-0.04869963	-0.020324043	0.037468782	-0.003527183	0.185300299	-0.074850968	0.280993658	0.041331372	0.008704816	0.335097866	0.054526265	-0.017128499	0.431461315	0.059272144	-0.051006126	0.166006933	-0.006905894	0.015489137	0.13741355
Uller_Ac4	-0.15615455	-0.089328039	0.052130375	-0.307131837	0.234290458	-0.087621433	-0.25594527	0.180673805	-0.075473256	0.152838181	-0.006124273	0.074639332	-0.136594766	0.06102558	0.083234335	-0.163013499	-0.169333308	-0.059085997	-0.180287117	-0.179503331	-0.040141991	-0.086395468	-0.199610305	-0.054321018	-0.105698516	-0.025125292	0.015094545	-0.033275928	0.053906477	0.041603588	-0.052402623	-0.027989578	0.044357433	-0.013676906	0.173263808	-0.0657766	0.270871321	0.033570746	0.00269997	0.326058904	0.048456247	-0.024548337	0.42310799	0.014492145	-0.080882587	0.165828942	0.001657643	0.052434984	0.142645347
Uller_Ac40	-0.181035177	0.003147078	0.069960713	-0.301407004	0.190318568	-0.067259712	-0.211893052	0.151365124	-0.05895392	0.164396507	-0.02840685	0.02506443	-0.132776257	0.017214031	0.121170856	-0.187595426	-0.169220392	-0.058269118	-0.204084924	-0.178334555	-0.041904028	-0.109116713	-0.229431823	-0.04961356	-0.128160075	-0.032031918	0.016871341	-0.021278294	0.060924891	0.021550738	-0.047300711	-0.029377114	0.036603384	-0.005837975	0.188373947	-0.064657218	0.25982082	0.055370636	0.016501946	0.34134046	0.060650087	-0.002566428	0.450769598	0.024607442	-0.030311336	0.156853053	0.030031223	0.005070134	0.147972326
Uller_Ac42	-0.147423409	-0.093014371	0.074747359	-0.291413418	0.234297581	-0.082611742	-0.229298062	0.174268182	-0.054910964	0.138587066	0.010315397	0.067476382	-0.133590498	0.031475107	0.112969026	-0.152035524	-0.182529567	-0.067523188	-0.173041207	-0.190935318	-0.044850239	-0.075574087	-0.212296917	-0.055257002	-0.126970319	-0.027471959	-0.004379309	-0.048510386	0.067687507	0.031309722	-0.063239473	-0.021819312	0.030890504	-0.031623197	0.182409421	-0.074083319	0.266494947	0.032639398	0.010989625	0.337053763	0.012258187	-0.024861132	0.427157753	-0.008169734	-0.074476377	0.166073237	0.037488808	0.047134769	0.13002861
Uller_Ac46	-0.16229633	-0.078426343	0.09115397	-0.266916713	0.23519441	-0.064904043	-0.198560794	0.17967232	-0.046770777	0.095031401	0.018207147	0.020704361	-0.135271618	0.027687636	0.115868554	-0.155363561	-0.183072583	-0.053177718	-0.173350315	-0.198959333	-0.045387557	-0.089024457	-0.221072192	-0.029199622	-0.125918371	-0.044759457	0.013456867	-0.081832779	0.075533586	0.007682505	-0.075134134	-0.016353821	0.025487662	-0.009450059	0.173023258	-0.053095993	0.290543078	0.020968011	-0.004602203	0.360057793	0.040497371	-0.013316956	0.448548094	0.035871597	-0.034195956	0.150635289	-0.025739282	-0.003009361	0.142448767
Uller_Ac48	-0.15888195	-0.056231286	0.076254167	-0.286948489	0.250247692	-0.083855509	-0.220050499	0.192540082	-0.061252103	0.132359514	-0.035838112	0.029868443	-0.142335446	0.014724247	0.095343007	-0.155006877	-0.161455683	-0.039956807	-0.168695179	-0.183463853	-0.037722626	-0.091533251	-0.212498215	-0.038455686	-0.127852902	-0.039058505	0.022235065	-0.032550486	0.054322013	0.036133901	-0.054736314	-0.034930465	0.038853803	-0.02929152	0.180657379	-0.07268218	0.262070211	0.040033525	0.003612254	0.34162499	0.054129786	-0.018336498	0.464024859	0.032490053	-0.04271007	0.147783981	0.013246854	0.017483716	0.115243954
Uller_Ac49	-0.13804864	-0.08466001	0.061912878	-0.286396137	0.230036597	-0.083895085	-0.235878943	0.178180123	-0.057680152	0.121629291	0.004589573	0.078643763	-0.137545744	0.017115519	0.105258679	-0.150826204	-0.168877381	-0.055278892	-0.16216214	-0.176759026	-0.050711919	-0.054552554	-0.191686974	-0.062799745	-0.128378568	-0.021995614	0.009644917	-0.052708128	0.066813371	0.033317581	-0.064013805	-0.013220364	0.041802744	-0.047837714	0.160014975	-0.082395111	0.269444852	0.037025268	-0.010741316	0.335974367	0.023902851	-0.048796335	0.476564489	-0.019731052	-0.069953915	0.146094848	0.018654396	0.058403719	0.1182554
Uller_Ac53	-0.179152628	-0.038742001	0.095659297	-0.278935779	0.213801678	-0.081812237	-0.224637279	0.15549108	-0.061750551	0.137123679	0.014957057	0.057094387	-0.161072343	0.041678387	0.095471403	-0.15678005	-0.165958386	-0.063982187	-0.166912262	-0.189908965	-0.068832691	-0.05928678	-0.207221191	-0.088634517	-0.142015716	-0.041469466	0.031102206	-0.061197525	0.075920978	0.052830613	-0.06367007	-0.018832003	0.049116071	-0.037980726	0.138851623	-0.07519315	0.281222228	0.040075214	0.020373452	0.332800704	0.025494441	-0.02811637	0.436509724	-0.023457651	-0.084262615	0.166939276	0.032032061	0.062569078	0.156627304
Uller_Ac54	-0.147172476	-0.084183756	0.075321912	-0.261716729	0.228813543	-0.082259035	-0.213302672	0.167616368	-0.067746423	0.128224847	-0.009634817	0.061605842	-0.107946778	0.003582018	0.114767664	-0.179204986	-0.16945914	-0.044962032	-0.185839981	-0.19172958	-0.044070535	-0.089072071	-0.197786517	-0.058780804	-0.144639314	-0.010791126	0.011615531	-0.047373756	0.058216489	0.031987438	-0.072063254	-0.022576943	0.041049902	-0.015242366	0.16251022	-0.086890555	0.265627325	0.049028339	6.45E-05	0.325090628	0.053663881	-0.037419599	0.488670293	0.022348162	-0.060089851	0.143405507	0.014027465	0.056017565	0.122792816
Uller_Ac55	-0.137178655	-0.079601292	0.078906784	-0.26682315	0.243189874	-0.065635648	-0.208176543	0.185024938	-0.035223085	0.105283174	0.04474434	0.065326662	-0.120722442	0.015839862	0.11801087	-0.143866005	-0.20043281	-0.061968967	-0.152432473	-0.217026891	-0.062889235	-0.059631284	-0.236918425	-0.048528615	-0.132785604	-0.032675882	-0.001605888	-0.08240923	0.076203004	0.001708339	-0.082719765	-0.020033566	0.028136666	-0.016175294	0.169475536	-0.061207583	0.260371505	-0.000460699	-0.001676597	0.344306852	0.001756527	-0.042092023	0.462950161	-0.006786678	-0.065920368	0.141098828	0.022821231	0.035849014	0.106120521
Uller_Ac57	-0.157664678	-0.0775725	0.075235372	-0.28194007	0.236306622	-0.090850231	-0.22213278	0.200681143	-0.066061551	0.142299116	-0.032060671	0.053653691	-0.139358854	0.030673486	0.103095288	-0.160895616	-0.174141433	-0.043466648	-0.174132626	-0.193559324	-0.046464154	-0.086570637	-0.217569908	-0.047407193	-0.137497614	-0.019334355	0.013038978	-0.026273197	0.055372902	0.038477589	-0.060627656	-0.036655399	0.041981248	-0.017984927	0.187205217	-0.071346797	0.260115653	0.042209197	0.006655134	0.327879374	0.049165097	-0.027171468	0.430660444	0.027277651	-0.056481387	0.159276209	0.025426213	0.036005288	0.143540672
Uller_Ac6	-0.151102789	-0.080503552	0.077113099	-0.266760304	0.225561927	-0.062918143	-0.213139811	0.191664071	-0.046341922	0.113956214	-0.004199194	0.039653703	-0.107175057	0.026647325	0.117011007	-0.171120556	-0.180882058	-0.04274783	-0.190410173	-0.200800002	-0.038102538	-0.097342085	-0.223097863	-0.03295158	-0.126444537	-0.030248158	0.003849484	-0.056783164	0.060359663	0.009387943	-0.072764971	-0.020501077	0.020564626	-0.00515667	0.177579054	-0.062719541	0.253811657	0.034751677	0.001253601	0.334687517	0.050735033	-0.024999833	0.480183113	0.035009603	-0.017405616	0.152714051	0.015389614	0.00701326	0.134870566
Uller_Ac60	-0.168468355	-0.089082053	0.088842738	-0.280963718	0.219692088	-0.061272274	-0.217388029	0.178683537	-0.052899623	0.085919233	0.057291	0.07861287	-0.142734158	0.034052054	0.135567292	-0.116283423	-0.178036398	-0.066883026	-0.135868993	-0.191840649	-0.062437993	-0.040510936	-0.213764198	-0.054226533	-0.148999642	-0.034664636	-0.008126973	-0.088556596	0.084332668	0.008381615	-0.081143738	-0.014052106	0.025672007	-0.017143122	0.167302933	-0.06470697	0.271873111	0.008439333	-0.006595123	0.345609048	0.003650609	-0.05153009	0.463681258	-0.027389818	-0.084778262	0.14703942	0.002694054	0.065928414	0.127520373
Uller_Ac62	-0.135013013	-0.067199408	0.094807605	-0.276584424	0.24227908	-0.060728376	-0.214788323	0.198652235	-0.038586528	0.104601323	0.009664761	0.00855793	-0.125895656	0.003580435	0.119357491	-0.158003936	-0.189644954	-0.045554514	-0.179820095	-0.206333751	-0.017503357	-0.079012403	-0.219114701	-0.035693359	-0.14003736	-0.033747842	0.012945179	-0.064072175	0.060196455	-0.001084508	-0.075269464	-0.017469182	0.016101309	-0.008725079	0.180743624	-0.049917289	0.270679989	0.022844868	-0.003214008	0.338128994	0.044497815	-0.006467634	0.477540872	0.021931241	0.005634757	0.163015251	-0.000139154	-0.023351119	0.111252566
Uller_Ac63	-0.192193343	-0.063709309	0.057031304	-0.251183381	0.238564747	-0.097483551	-0.17931245	0.171950198	-0.046374974	0.118649214	-0.016771099	-0.003258575	-0.151050969	0.000928977	0.11323062	-0.170114258	-0.167805758	-0.020402392	-0.188639411	-0.218035601	-0.026734218	-0.096867067	-0.248155505	-0.018820493	-0.127468354	-0.026927706	0.024912885	-0.059686559	0.073180249	0.030508195	-0.069970909	-0.011194499	0.03780647	0.013486173	0.205130427	-0.000267443	0.254837494	0.026194189	-0.017818626	0.339854118	0.057767655	-0.018933788	0.466439672	0.064148611	-0.009984053	0.163491658	0.003538758	-0.005332457	0.146507571
Uller_Ac65	-0.166378449	-0.036146884	0.070932481	-0.267354125	0.160105303	-0.081639274	-0.207277422	0.128130216	-0.048290446	0.129371432	0.006418765	0.050222349	-0.135029669	-0.0067247	0.112262121	-0.167929512	-0.136982589	-0.047081761	-0.185861194	-0.163446334	-0.054552038	-0.106843365	-0.194267391	-0.070778288	-0.13388	-0.016964483	0.029946385	-0.047537619	0.058985426	0.036943279	-0.0623038	-0.014134858	0.036398032	-0.040090555	0.162712833	-0.066428988	0.249028337	0.059867665	-0.012735941	0.350989995	0.036042756	-0.047030192	0.56374938	-0.01532515	-0.046303253	0.128957577	0.035443001	0.043516303	0.114965517
Uller_Ac70	-0.142663361	-0.077755426	0.089235488	-0.296203005	0.223131748	-0.093242715	-0.224888017	0.180855143	-0.063115195	0.124847998	-0.008489357	0.077254882	-0.135852208	0.027436803	0.107869672	-0.15469746	-0.15890099	-0.047688478	-0.161426954	-0.184951893	-0.060108841	-0.059998453	-0.193922689	-0.067810231	-0.132251061	-0.030569654	0.018938208	-0.053845132	0.066829133	0.029134823	-0.066552946	-0.015532777	0.045601487	-0.024403843	0.174909237	-0.080296986	0.269267003	0.022014688	-0.006624422	0.343138814	0.021164451	-0.037681314	0.457624592	0.013741878	-0.067526986	0.155137301	0.003333427	0.039279176	0.110491173
Uller_Ac71	-0.174066567	-0.09492218	0.097581702	-0.247572805	0.210530226	-0.058220958	-0.190501463	0.164960239	-0.033019813	0.104472621	0.000912639	-0.011756549	-0.144047463	-0.009391172	0.103905798	-0.183589123	-0.172373429	-0.01793574	-0.182046566	-0.19994742	-0.039547023	-0.106476645	-0.200461774	-0.023820497	-0.123983997	-0.026039465	0.011857703	-0.063610694	0.076428439	-0.003845539	-0.075990516	-0.007528088	0.009802346	0.01517299	0.168327725	-0.045875159	0.269895409	0.0366444	0.012375735	0.339773859	0.058967052	-0.007276177	0.533076003	0.031890945	-0.03431598	0.15116202	0.006438326	0.02335464	0.104945911
Uller_Ac74	-0.161798334	-0.113533982	0.086958372	-0.279004316	0.232236032	-0.05798896	-0.211430991	0.185456714	-0.056106969	0.125193577	0.009838384	-0.025582279	-0.145117216	-0.006472046	0.110853959	-0.193316565	-0.170370053	-0.021363234	-0.204295225	-0.181760287	-0.013276026	-0.111338127	-0.211401847	-0.038670512	-0.124403108	-0.025954211	0.017685191	-0.060904792	0.06648518	0.003838435	-0.068720894	-0.011741746	0.021035432	0.014205933	0.149752819	-0.052567302	0.279252685	0.01795056	0.013409205	0.343267163	0.046895674	0.011992306	0.45310554	0.065013465	0.001839104	0.192714809	0.000579768	-0.008611028	0.166644539
Uller_Ac75	-0.137256009	-0.098908827	0.089829968	-0.285327644	0.253375876	-0.073059345	-0.226441026	0.202807031	-0.039747816	0.108934498	0.031629021	0.063520523	-0.112204816	0.028061997	0.125891047	-0.140222624	-0.200126988	-0.067216939	-0.145434968	-0.214033659	-0.067258803	-0.05055314	-0.231073828	-0.046889062	-0.150414937	-0.024551702	-0.008776812	-0.072442765	0.096454849	0.009492609	-0.077199979	-0.001324688	0.028953894	-0.034412122	0.158452972	-0.084112077	0.272849313	0.021776634	0.01158805	0.329051781	0.001594525	-0.041030519	0.408608906	-0.002811731	-0.06681358	0.168101383	0.015988005	0.071172082	0.150958851
Uller_Ac79	-0.141152572	-0.075263409	0.099137772	-0.260324017	0.236495823	-0.079630051	-0.193935807	0.18218879	-0.04716455	0.119022856	-0.006394602	0.036909056	-0.120074787	0.000667694	0.126840137	-0.185645006	-0.181529328	-0.044173809	-0.193242057	-0.189906003	-0.042254803	-0.093467102	-0.21638976	-0.031258333	-0.12067618	-0.03490654	-0.004087246	-0.069530497	0.059008908	0.004529968	-0.082447651	-0.021964245	0.024887593	-0.016276161	0.193793421	-0.082457501	0.262557382	0.021327484	0.011267714	0.336374008	0.053710612	-0.018920198	0.452996142	0.055301072	-0.037151028	0.179306344	0.00194792	0.026114396	0.154676276
Uller_Ac8	-0.167787966	-0.113687876	0.058968248	-0.264616979	0.235935819	-0.076763557	-0.195137711	0.172394073	-0.041900906	0.121688704	-0.011547189	0.046817256	-0.134163313	0.02060675	0.097904243	-0.180652115	-0.167632202	-0.040028032	-0.192245807	-0.187289356	-0.027251904	-0.084476411	-0.207292575	-0.02742953	-0.140515188	-0.024908206	0.001256472	-0.053899689	0.056276094	0.007735809	-0.064700705	-0.010648977	0.029315109	0.000905689	0.179283004	-0.072775303	0.289173064	0.038020742	0.005248089	0.341086589	0.059699326	-0.024157623	0.458877492	0.050872683	-0.057079601	0.172603139	-0.02557323	0.028304103	0.108144054
Uller_Ac83	-0.137005773	-0.072767322	0.084208084	-0.295127226	0.23339895	-0.089218502	-0.244063776	0.194808687	-0.066092848	0.122266238	0.000351213	0.055433591	-0.131771198	0.009979018	0.101342623	-0.14976731	-0.161980152	-0.051656478	-0.15701802	-0.187414908	-0.064172987	-0.068335279	-0.199345663	-0.056628683	-0.129131462	-0.034563254	0.024536793	-0.04590851	0.061009482	0.037465513	-0.059559683	-0.024044727	0.039993114	-0.033492166	0.170289503	-0.07515708	0.251619478	0.028770262	0.002815463	0.33521105	0.031132042	-0.039873936	0.464927944	-0.014913157	-0.060047644	0.156449182	0.023598903	0.043169497	0.12604927
Uller_Ac86	-0.161373652	-0.109199521	0.076392369	-0.268372602	0.21844536	-0.098009326	-0.199968906	0.163777237	-0.066382043	0.140114174	-0.006900987	0.050534729	-0.124547815	0.007664237	0.121591211	-0.170530701	-0.161137412	-0.052897785	-0.183853359	-0.177517025	-0.045004173	-0.099375408	-0.18528865	-0.062723461	-0.148264845	-0.012535681	0.035083329	-0.058997007	0.063094195	0.030927616	-0.068057877	-0.022041734	0.047359741	-0.018818984	0.156993196	-0.087783007	0.277866222	0.047993671	0.008646788	0.340749067	0.050685701	-0.035514416	0.46093002	0.018441188	-0.061851167	0.172952846	0.016546222	0.050729457	0.129439688
Uller_Ac87	-0.161685342	-0.069044761	0.080242461	-0.289651592	0.227171899	-0.100278998	-0.238654851	0.174087985	-0.073628051	0.149703404	-0.015956169	0.080959758	-0.150704273	0.020555882	0.099380748	-0.156750329	-0.155401188	-0.067003021	-0.183774203	-0.170721446	-0.055600608	-0.076348816	-0.188055859	-0.066269491	-0.130763861	-0.014031914	0.032418964	-0.036686398	0.066805977	0.046462831	-0.056372915	-0.020802531	0.049965023	-0.024822606	0.133402523	-0.088264756	0.265866028	0.03001647	-0.003288581	0.335185019	0.039441597	-0.046358933	0.445407205	0.02866848	-0.071330393	0.168125074	0.015271188	0.050658679	0.140252864
Uller_Ac89	-0.138803338	-0.101421839	0.070558424	-0.292302741	0.238062703	-0.070002169	-0.23563491	0.185351561	-0.045776854	0.110611645	0.002330578	0.060765217	-0.126242907	0.035984106	0.106520118	-0.160274949	-0.160835574	-0.033861623	-0.157602775	-0.181525673	-0.042066995	-0.069039998	-0.204332304	-0.049319514	-0.139936503	-0.031819274	0.006907141	-0.065154002	0.068104191	0.011044853	-0.07517984	-0.01805285	0.02686914	-0.012149956	0.17316673	-0.089882574	0.283409348	0.003297537	0.00809302	0.347696128	0.02361767	-0.021433016	0.446599865	0.035478613	-0.053126834	0.162711606	-0.002687895	0.029875371	0.12945159
Uller_Ac9	-0.157343179	-0.078934617	0.073952025	-0.281349564	0.231125209	-0.058609368	-0.222432749	0.184604265	-0.038405342	0.106987838	0.01817221	0.055247134	-0.14705163	0.009001151	0.114670781	-0.135827744	-0.180405779	-0.057719075	-0.149162339	-0.194376237	-0.055392981	-0.055037166	-0.204220844	-0.037199218	-0.141899858	-0.023297899	-0.000145182	-0.073263454	0.085335811	0.008814786	-0.070741598	-0.008682297	0.029782962	-0.010603901	0.148832383	-0.076878672	0.261242144	0.026316462	0.002161483	0.341054888	0.019775098	-0.043627647	0.479500898	-0.009153417	-0.063329159	0.149621128	0.025879769	0.049703541	0.129308955
Uller_As100	-0.110054577	-0.021622352	0.110633687	-0.301356059	0.233176573	-0.079286299	-0.22478758	0.19576379	-0.028455136	0.083933541	0.043696618	0.02261771	-0.110921507	0.045528632	0.133166358	-0.140675095	-0.225520241	-0.08025171	-0.164206904	-0.22860416	-0.048680495	-0.047457341	-0.225260483	-0.068944368	-0.156643768	-0.020179553	0.018665825	-0.091495807	0.0864957	0.01749636	-0.083588806	0.002523868	0.030870586	0.013949989	0.143571748	-0.051822092	0.28723771	-0.00100942	0.005373583	0.348150484	0.00987176	-0.008620493	0.420093801	0.030103533	-0.032188239	0.156828558	-0.006254332	0.038093005	0.127827775
Uller_As104	-0.132071172	-0.039317287	0.081057172	-0.304751464	0.206222045	-0.084946643	-0.237561383	0.18119315	-0.046070332	0.109755729	0.018134342	0.070806283	-0.118671137	0.042617241	0.102552972	-0.155033561	-0.182274557	-0.064508024	-0.172737544	-0.199388933	-0.047341766	-0.052885498	-0.217592729	-0.085231682	-0.151882523	-0.022147067	0.015692627	-0.065241912	0.081812488	0.040240383	-0.060209997	-0.017118974	0.035058907	-0.004429796	0.152115986	-0.066832789	0.275218298	0.022706049	0.023078446	0.341063555	0.016198362	-0.02380744	0.431159825	0.002510955	-0.072558011	0.198605242	0.025091791	0.046926916	0.107052467
Uller_As106	-0.125060237	-0.054980865	0.09267345	-0.299783562	0.228993689	-0.088636838	-0.230500145	0.191902319	-0.048898169	0.140898244	0.018957777	0.067259399	-0.121042662	0.038088167	0.103550863	-0.14120116	-0.192213677	-0.065288105	-0.15396381	-0.213754288	-0.057930794	-0.042774668	-0.236071002	-0.091341804	-0.145067795	-0.023048254	0.011343566	-0.067730767	0.087763711	0.036255955	-0.071963717	-0.00711921	0.043846338	-0.012480968	0.164857801	-0.061592793	0.253523629	0.018313969	0.015095745	0.318639403	0.018680216	-0.029784477	0.439923416	-0.018286308	-0.072895273	0.160178858	0.029592206	0.045919221	0.10338333
Uller_As109	-0.113931835	-0.038799493	0.088616197	-0.309134002	0.250537514	-0.098730025	-0.244541615	0.189395102	-0.044976805	0.122902408	-0.009507739	0.050252103	-0.122800209	0.048873479	0.123504175	-0.133029318	-0.221219741	-0.077477635	-0.151685667	-0.238063144	-0.063610547	-0.038402796	-0.243417792	-0.056574508	-0.13934529	-0.00718228	-0.002461552	-0.058238056	0.085873797	0.035818307	-0.068691168	0.000753392	0.044010749	0.015195106	0.196364311	-0.043933923	0.260564007	0.009559178	0.014049683	0.319937126	0.003785902	-0.02600836	0.398556997	0.009532197	-0.071349043	0.156631263	0.013887565	0.05228757	0.110195196
Uller_As11	-0.133281177	-0.077870298	0.083766261	-0.294950525	0.227721411	-0.079314877	-0.223558314	0.19120708	-0.037808551	0.099974796	0.033877716	0.057483244	-0.11303558	0.041537131	0.126270774	-0.152842049	-0.20276092	-0.070231025	-0.167087422	-0.21472643	-0.061832049	-0.063685379	-0.240615463	-0.04650955	-0.144403396	-0.018280675	-0.0075255	-0.064893091	0.092579067	0.021709939	-0.070098395	0.006395337	0.034127892	0.016537108	0.173053014	-0.066492617	0.275520886	-0.00086442	0.004585411	0.337256937	0.019068706	-0.018569778	0.403540284	0.0364906	-0.055415872	0.194917146	0.00270677	0.02804104	0.120961073
Uller_As112	-0.152388913	-0.05357506	0.083107184	-0.285818809	0.20736544	-0.079266692	-0.219854951	0.165150344	-0.041158182	0.10391345	0.02682637	0.080323314	-0.123541498	0.001094327	0.113292809	-0.148812498	-0.184853178	-0.083133147	-0.17447916	-0.196858123	-0.057096237	-0.058504529	-0.223259419	-0.054201247	-0.14888347	-0.004291358	-0.011847575	-0.064809091	0.082283624	0.023738466	-0.069088368	-0.001489082	0.037467248	0.018218392	0.15606095	-0.074231386	0.284474944	0.022768202	0.00850595	0.348781566	0.013855217	-0.036082298	0.440388465	0.011128221	-0.095797037	0.158584881	0.030218611	0.074538257	0.112059743
Uller_As114	-0.138162436	-0.026659138	0.099142984	-0.307361138	0.211129874	-0.094073436	-0.238869905	0.170879315	-0.052702008	0.093925172	0.030205627	0.076372667	-0.118754009	0.05505451	0.096589769	-0.123328106	-0.193993292	-0.086107167	-0.141870477	-0.21082783	-0.065483515	-0.04299047	-0.216415449	-0.087670817	-0.143408105	-0.033839969	0.014598173	-0.077903962	0.085250431	0.04770893	-0.077048812	-0.006176398	0.05233958	-0.010130104	0.169754776	-0.042708592	0.26254566	0.011389977	0.012574476	0.32838911	0.006411968	-0.034204654	0.449880869	-0.034805179	-0.097820991	0.174082285	0.023504317	0.05252474	0.109910705
Uller_As117	-0.162891638	-0.043781823	0.085955092	-0.306221305	0.215599746	-0.111311027	-0.244275614	0.175544415	-0.052504924	0.160005713	-0.014530432	0.083473076	-0.149674413	0.044286154	0.10781009	-0.153522801	-0.176399671	-0.083778911	-0.167493876	-0.192914949	-0.07779655	-0.053713751	-0.212593505	-0.075783632	-0.13518945	-0.01991641	0.020124223	-0.028623743	0.067970811	0.061895066	-0.03673455	-0.01330049	0.074836219	-0.018062309	0.164046378	-0.088473479	0.263773599	0.024125601	0.005180652	0.323294494	-0.001467548	-0.035133519	0.412330582	0.010132742	-0.075762219	0.174912708	0.041814753	0.034431635	0.114177324
Uller_As118	-0.127745072	-0.025928062	0.100453526	-0.311654179	0.202197255	-0.095505984	-0.251416052	0.157943344	-0.071207016	0.140964295	0.005728608	0.086039194	-0.11488104	0.048456628	0.114901414	-0.170176852	-0.185946148	-0.079878359	-0.177751814	-0.207708146	-0.079225925	-0.047828543	-0.218728843	-0.104646706	-0.147773679	-0.006002175	0.007687372	-0.042581411	0.082315889	0.046341971	-0.050444501	-0.004801279	0.059267553	-0.003693671	0.160019591	-0.074730329	0.274838992	0.025580202	0.007431251	0.33176347	0.009702871	-0.039810557	0.397167965	-0.000217936	-0.075857163	0.175982984	0.024357362	0.072036702	0.12129616
Uller_As120	-0.141623677	-0.083997422	0.066955749	-0.290303917	0.242155671	-0.089112433	-0.238807962	0.201102928	-0.065294457	0.146950159	0.008492442	0.089294884	-0.128092309	0.019174726	0.112918182	-0.161914328	-0.206655399	-0.061761804	-0.172586591	-0.223120971	-0.057659542	-0.048087702	-0.23945089	-0.071285463	-0.125893253	-0.012026561	0.008731863	-0.045692019	0.091752744	0.037863871	-0.05885897	-0.011463423	0.035575727	0.02186055	0.186700105	-0.071206877	0.263431	0.018281096	0.009005555	0.321703763	0.009881671	-0.037314817	0.381239939	0.013223113	-0.078700598	0.169614937	0.032360269	0.049895577	0.10795599
Uller_As122	-0.134782338	0.00719033	0.099474467	-0.289937113	0.226486883	-0.096403688	-0.243358391	0.188102996	-0.04774264	0.142159004	-0.023409238	0.057902047	-0.12220322	0.036699775	0.103973047	-0.16814047	-0.210072911	-0.05867415	-0.188181456	-0.218413986	-0.042142792	-0.09609407	-0.250432745	-0.077401153	-0.128713307	-0.031790094	0.006125834	-0.025541658	0.0674056	0.040523387	-0.043331194	-0.028540666	0.032070398	0.023759562	0.192527557	-0.0469741	0.252383594	0.028799172	-0.000627159	0.325991703	0.031341149	-0.016028228	0.416859388	0.047408362	-0.033295287	0.158849223	0.023824297	0.020619629	0.107981105
Uller_As123	-0.155516252	-0.026595169	0.09217207	-0.288312287	0.209815747	-0.084296768	-0.220876332	0.165886326	-0.034345565	0.115477291	0.028002205	0.05832189	-0.136576419	0.021591902	0.106012644	-0.155386228	-0.205330854	-0.072079094	-0.171397132	-0.206615996	-0.052401541	-0.06058672	-0.21643159	-0.055713238	-0.150580307	-0.018816481	-0.008688263	-0.066129939	0.081730631	0.028349369	-0.069962478	5.19E-05	0.036967869	0.021151707	0.166349299	-0.04711919	0.279654936	0.013816032	0.004776908	0.35616997	0.023729903	-0.024607876	0.425401381	0.02354021	-0.071607961	0.168402514	0.005642939	0.049119654	0.117059607
Uller_As124	-0.15277183	-0.062525712	0.096523719	-0.283185995	0.245591482	-0.08314492	-0.214190099	0.173267453	-0.046355489	0.100740972	0.004545658	0.03171236	-0.129258169	0.030007548	0.118504748	-0.161918219	-0.206594173	-0.052447134	-0.170850952	-0.223491021	-0.040055043	-0.072155353	-0.214004231	-0.039483304	-0.150099652	-0.027555545	-0.001692096	-0.056209335	0.080526471	0.017149504	-0.071982829	-0.00847019	0.034247208	0.034810004	0.189811567	-0.028642627	0.266745283	0.005873586	-0.010653521	0.334736469	0.025390788	-0.014580326	0.440482001	0.055122476	-0.024587126	0.161383717	-0.004060938	0.000542337	0.124570872
Uller_As126	-0.138972676	-0.02721408	0.093467	-0.295544042	0.231415365	-0.082517496	-0.235679687	0.188456224	-0.029046713	0.09841882	0.003059028	0.050662349	-0.119202796	0.048730236	0.115591973	-0.141178973	-0.195498276	-0.071937651	-0.162747755	-0.201265637	-0.056920773	-0.046718656	-0.235822716	-0.060310456	-0.14634137	-0.02534517	0.007773408	-0.058474972	0.07929673	0.025789949	-0.064516264	-0.016892913	0.032832598	-0.003597529	0.166706267	-0.083486951	0.278634274	0.018124297	0.016494317	0.34610291	0.024521085	-0.022051057	0.423384813	0.023677698	-0.062818105	0.152399849	-0.008498462	0.044664056	0.118134946
Uller_As128	-0.157511954	-0.07030576	0.070002695	-0.303627202	0.229117573	-0.110584869	-0.228505771	0.179594266	-0.051279672	0.173271218	-0.046745551	0.025093925	-0.140222824	0.053534155	0.100444662	-0.189351898	-0.184537549	-0.051757403	-0.209168042	-0.186011084	-0.029232386	-0.118725959	-0.223487575	-0.055003938	-0.119365632	-0.024327213	0.042919129	-0.006314151	0.04426217	0.04660412	-0.028381829	-0.038652184	0.043210368	0.009909003	0.196375996	-0.057083186	0.262026413	0.03082494	0.00630484	0.333129232	0.055194361	-0.002979204	0.416042951	0.058633233	-0.009323519	0.160199006	0.020489518	-0.005385351	0.114394797
Uller_As13	-0.143760443	-0.066599096	0.084093581	-0.276170539	0.225195016	-0.094286735	-0.209773471	0.17393046	-0.034234163	0.091537444	0.018233669	0.054292528	-0.113178809	0.02706058	0.107212316	-0.158457314	-0.202422057	-0.068162298	-0.18063336	-0.211270731	-0.054064533	-0.079776316	-0.231421051	-0.035412373	-0.141761192	-0.02175121	-0.005796862	-0.062067502	0.078766998	0.023635266	-0.070592729	0.003899464	0.039952489	0.029933605	0.172276557	-0.034819595	0.280627773	0.020004772	-0.009702626	0.357246046	0.030504477	-0.033230034	0.434792944	0.043693513	-0.05880426	0.153047628	0.000462602	0.044120616	0.112895504
Uller_As136	-0.128157123	-0.063177525	0.093334284	-0.28130543	0.224629639	-0.087071452	-0.212989018	0.178173091	-0.03815117	0.088181147	0.038974365	0.064636336	-0.12311306	0.022650682	0.129646387	-0.146479442	-0.207778455	-0.071904275	-0.165153478	-0.202098848	-0.050231472	-0.056804585	-0.230348966	-0.058013193	-0.139642171	-0.029710809	-0.003747647	-0.079543801	0.096595569	0.019788953	-0.075341816	-0.007836344	0.018927323	-0.008567816	0.172660424	-0.042547719	0.272767487	0.007223664	-0.010179158	0.365159816	0.014016066	-0.040099182	0.428772331	-0.000858202	-0.056962195	0.154634098	0.028528256	0.059521925	0.123125965
Uller_As137	-0.156431163	-0.047253906	0.105765312	-0.329642464	0.23724839	-0.096468654	-0.269405323	0.208406434	-0.048573064	0.117322945	-0.066993456	0.024672748	-0.158372369	0.041872185	0.118105487	-0.098898144	-0.174071181	-0.062290386	-0.105423834	-0.193626144	-0.053525528	0.000699104	-0.156335124	-0.020168609	-0.197103803	0.0158594	0.015939474	-0.044967746	0.068107755	0.042269398	-0.077470251	-0.017786847	0.022547845	0.008651043	0.160606957	-0.0660914	0.278507623	0.009155397	0.001506928	0.345302865	0.012101336	-0.026374049	0.436373311	0.002980923	-0.079085165	0.152512315	0.003514673	0.059214999	0.132197696
Uller_As138	-0.129667661	-0.08254679	0.073367647	-0.289610766	0.200570445	-0.069784263	-0.227341061	0.1759009	-0.03047635	0.1475855	0.014445968	0.028515859	-0.115033678	0.030762085	0.12396611	-0.166609479	-0.196155935	-0.051498104	-0.181567359	-0.213096457	-0.037677388	-0.079146962	-0.233763158	-0.057751124	-0.165621835	-0.02372806	0.003276141	-0.083029104	0.093615682	0.012538291	-0.078972966	0.007974155	0.023588417	0.020250055	0.172194531	-0.040007101	0.27333349	0.020238982	0.016924026	0.345653552	0.019634698	-0.001950565	0.425698458	0.005742604	-0.030058337	0.179049278	0.024261878	0.014360425	0.126703592
Uller_As140	-0.152332159	0.012110433	0.094557042	-0.316943979	0.225185478	-0.099381683	-0.254719908	0.18787278	-0.064265583	0.149694959	-0.041280216	0.072219915	-0.141909172	0.043164886	0.095979728	-0.142749444	-0.191525392	-0.082914049	-0.161977894	-0.205572403	-0.07364123	-0.059122968	-0.21799162	-0.076789206	-0.124886518	-0.012906237	0.028160409	-0.019563615	0.06811469	0.066601671	-0.041487314	-0.027085268	0.05972649	-0.010456331	0.150035955	-0.075608587	0.257588667	0.028779849	0.003169005	0.329679587	0.027172757	-0.03350371	0.419088589	0.008144454	-0.070085782	0.16372378	0.035888212	0.041717308	0.100852776
Uller_As141	-0.13497089	-0.108812282	0.063566548	-0.295644503	0.241049006	-0.086383625	-0.236227529	0.185112403	-0.05103398	0.124385121	0.014116737	0.070641582	-0.141227917	0.044247641	0.107460159	-0.138203813	-0.198732694	-0.069206834	-0.165976831	-0.217883271	-0.045989088	-0.044314018	-0.22483906	-0.066196236	-0.153782172	-0.006500159	0.00638061	-0.054081686	0.095301316	0.030900152	-0.058421201	-0.000490969	0.046514137	0.012452644	0.179866252	-0.062864038	0.270618311	0.010185388	0.002249311	0.329122413	0.002131587	-0.036667852	0.403470727	0.010496661	-0.073387184	0.167105568	0.021035158	0.066619466	0.108564536
Uller_As146	-0.147127663	-0.044854076	0.086427638	-0.288258004	0.217441864	-0.105987256	-0.217536466	0.177766036	-0.052247824	0.113956262	-0.00551367	0.073539324	-0.12461682	0.035841458	0.115053374	-0.156749835	-0.183953314	-0.062780912	-0.156674058	-0.191191196	-0.0778872	-0.06159775	-0.235331804	-0.064030834	-0.13383685	-0.021851111	0.028748723	-0.05355713	0.071689436	0.053022977	-0.061603565	-0.017321276	0.049214464	-0.001876595	0.172853988	-0.063778478	0.261251688	0.016107875	-0.013839138	0.330704226	0.028272226	-0.04294299	0.463945179	0.011740903	-0.06918993	0.135730379	0.024445003	0.053928047	0.098546152
Uller_As149	-0.158503166	-0.037303638	0.074824952	-0.303733866	0.242804423	-0.110482936	-0.247244867	0.193338334	-0.06542715	0.161011387	-0.015712997	0.09757035	-0.147059425	0.048963238	0.091974171	-0.140305603	-0.195698603	-0.091075202	-0.159107552	-0.213069617	-0.084895501	-0.038934253	-0.221635549	-0.084351873	-0.132181609	-0.023757149	0.036998891	-0.02323642	0.068069762	0.065956268	-0.046497195	-0.03314691	0.068753328	0.001467519	0.175074187	-0.09590311	0.255232496	0.027633609	-0.00604086	0.308600283	0.012655527	-0.047727832	0.387869888	-0.007576705	-0.099085838	0.164411152	0.040365297	0.068885391	0.099573507
Uller_As15	-0.137944252	-0.023830557	0.09007485	-0.277592429	0.228431953	-0.083999344	-0.214035036	0.185874721	-0.041602037	0.134520492	-0.01396415	0.047597635	-0.122558229	0.043619156	0.105022247	-0.186737884	-0.204079377	-0.055142385	-0.196360413	-0.22236226	-0.052063657	-0.100736976	-0.249286795	-0.073095414	-0.134783634	-0.026018002	0.014402363	-0.035906987	0.055476085	0.036565049	-0.043050481	-0.0247428	0.044368345	0.012659523	0.174894781	-0.072408047	0.262488922	0.039831247	-0.003375604	0.33603307	0.045394182	-0.021804336	0.417540241	0.050387042	-0.017415042	0.159463554	0.014233517	0.014770404	0.115609353
Uller_As152	-0.15140617	-0.052386616	0.076469368	-0.294779426	0.205005599	-0.087679545	-0.223453068	0.163977177	-0.040354798	0.124600177	0.009974033	0.082694893	-0.131176903	0.034845506	0.104114043	-0.15255854	-0.189951365	-0.084972557	-0.167088242	-0.189342377	-0.070112392	-0.056251232	-0.208598552	-0.055097129	-0.140201622	-0.014194259	0.00107737	-0.051736017	0.086176164	0.04147723	-0.061197733	-0.002279987	0.048649139	-0.018057608	0.149773045	-0.075076878	0.280238093	0.027601381	0.010089825	0.355318688	0.015094837	-0.047704214	0.439823515	-0.00329506	-0.088835978	0.152578274	0.034520357	0.073464363	0.101626044
Uller_As159	-0.122543966	-0.043396814	0.089873043	-0.271623148	0.230455696	-0.090982462	-0.204910684	0.187650241	-0.032861739	0.121708924	0.020958958	0.057460678	-0.11937544	-0.001506706	0.10484588	-0.167495421	-0.214149284	-0.063551767	-0.183298272	-0.2104793	-0.054822037	-0.086693154	-0.238293071	-0.040155633	-0.141742388	-0.023763072	0.000174983	-0.063390282	0.077839794	0.021089744	-0.072730688	-0.011972651	0.026232385	-0.008752658	0.188669653	-0.053669125	0.26805136	0.016242978	0.000974017	0.34393383	0.034308361	-0.026411531	0.424923269	0.02956826	-0.049946083	0.16279697	0.01654848	0.042899813	0.130952374
Uller_As162	-0.131094916	-0.042277718	0.101998235	-0.29337284	0.23025798	-0.098050136	-0.235604498	0.181013562	-0.05650546	0.135893174	0.026364879	0.088965235	-0.139284709	0.01987456	0.127191619	-0.155086028	-0.207255901	-0.076963107	-0.156712009	-0.224235266	-0.08179025	-0.046821222	-0.232049158	-0.079009018	-0.141032112	-0.017692669	-0.005974429	-0.053604474	0.089783618	0.037609533	-0.057310008	-0.007986561	0.043073133	0.007155157	0.176616787	-0.067934689	0.263333668	0.010985449	0.005974871	0.321215403	-0.001397833	-0.042464896	0.392405196	-0.000988165	-0.088778043	0.171521152	0.041672069	0.068420067	0.121516636
Uller_As163	-0.129703168	-0.033948589	0.072806755	-0.275994152	0.25712215	-0.078454533	-0.226599498	0.217871031	-0.047578108	0.121563341	-0.017047361	0.06750319	-0.111771868	0.036958055	0.094432156	-0.159018277	-0.220146821	-0.066541657	-0.17508196	-0.237670243	-0.05745311	-0.0763946	-0.26417759	-0.031674056	-0.135868709	-0.041495251	0.003482732	-0.044647352	0.066293799	0.037624038	-0.064308089	-0.029732763	0.042275895	0.031608243	0.206673044	-0.060243786	0.261049284	0.033007084	0.011063924	0.326857161	0.040401091	-0.022665472	0.386720872	0.032238328	-0.050132905	0.17062667	0.033793199	0.016542906	0.100341624
Uller_As164	-0.110177026	-0.032263052	0.097283774	-0.288179005	0.235058649	-0.064573318	-0.233311748	0.172123557	-0.023392832	0.094536661	0.016231875	0.017035312	-0.09005596	0.027139165	0.116561672	-0.166218888	-0.209566591	-0.057494865	-0.176125428	-0.224862	-0.031935604	-0.068465098	-0.235376985	-0.048045798	-0.161556585	-0.019649847	-0.008946393	-0.071047731	0.083227861	0.000982588	-0.075428658	0.003863134	0.022622367	0.01692204	0.182124255	-0.043567292	0.270835444	0.012197284	-0.007117735	0.353977035	0.039739692	0.001633219	0.446239216	0.033735058	-0.00720753	0.159143931	-0.009803221	0.006817284	0.109224547
Uller_As174	-0.144582251	-0.067030919	0.06702787	-0.323938312	0.226474139	-0.083451888	-0.240475425	0.163888437	-0.060043752	0.117866656	-0.012410456	0.065109852	-0.123985589	0.038517965	0.106661255	-0.149586587	-0.184466816	-0.086054878	-0.170559027	-0.184609414	-0.061385246	-0.1016087	-0.209522407	-0.031182079	-0.129252146	-0.005808625	0.014827489	-0.03276964	0.064148717	0.040199928	-0.049184912	-0.009473006	0.046848685	0.000827229	0.165604591	-0.077660641	0.274826982	0.019659869	0.008189937	0.340723432	0.021541053	-0.020405081	0.430282046	0.025299956	-0.070599231	0.159623089	0.020513095	0.051607428	0.126092742
Uller_As176	-0.1185905	-0.040167507	0.081151398	-0.320503864	0.220403089	-0.091243985	-0.266524186	0.181365751	-0.044717946	0.132458677	0.024002135	0.074966674	-0.120224872	0.035808494	0.111144255	-0.148572177	-0.18445132	-0.079513922	-0.159643839	-0.190554825	-0.072568672	-0.059552106	-0.231685576	-0.083821442	-0.141475466	-0.005846973	0.024713968	-0.057549131	0.080944453	0.040727974	-0.054890968	-0.003539261	0.04860076	-0.004668564	0.121224539	-0.083500941	0.276554259	0.01550737	0.007964285	0.335975575	0.005412138	-0.018944625	0.417348665	-0.006472786	-0.076003302	0.169957271	0.033424933	0.069275683	0.111541889
Uller_As178	-0.12927816	-0.074461317	0.079713682	-0.296715961	0.250564264	-0.07370987	-0.222916985	0.197697424	-0.051021079	0.123510712	-0.002885642	0.046372455	-0.119078664	0.039272932	0.096680879	-0.17674495	-0.218375336	-0.056721975	-0.182096392	-0.225626991	-0.05637123	-0.072004649	-0.249614418	-0.044569017	-0.137099185	-0.022057955	0.006756579	-0.038992015	0.095945715	0.02762825	-0.058006512	-0.000327165	0.036650175	0.017583439	0.182176193	-0.063578841	0.272022253	0.016965081	0.004493993	0.323993597	0.031477952	-0.013486682	0.383357823	0.04593654	-0.042717842	0.173790934	0.005221212	0.044482765	0.13627598
Uller_As180	-0.166346415	-0.028387474	0.083969817	-0.304859936	0.210409575	-0.071954775	-0.215299594	0.154664465	-0.024802645	0.121738525	0.011883038	0.053966925	-0.137268527	0.019159703	0.092556131	-0.173670594	-0.182137284	-0.070790243	-0.182307544	-0.197486005	-0.05393388	-0.075751921	-0.212944925	-0.055562221	-0.141698093	-0.007201269	0.008235337	-0.054857237	0.078205868	0.019809611	-0.059300246	0.00295166	0.03721606	0.010572662	0.128895564	-0.078087586	0.282366445	0.014453638	0.004633282	0.353976219	0.032366839	-0.021385311	0.440198543	0.044100209	-0.053594483	0.170605878	0.005826431	0.042808667	0.137837554
Uller_As181	-0.159527775	-0.027747248	0.073841528	-0.268698014	0.230350482	-0.086621871	-0.207575819	0.173648967	-0.026400735	0.147116539	-0.028916469	0.033884627	-0.141982511	0.04979916	0.092729502	-0.169879	-0.209888427	-0.0535714	-0.187703809	-0.224356593	-0.039999577	-0.0798433	-0.250993991	-0.060114327	-0.135285212	-0.007915878	0.015960374	-0.030824032	0.069493967	0.040624676	-0.048170765	-0.022594448	0.036660432	-0.010639964	0.196164192	-0.052563425	0.259126268	0.03428368	-0.006535991	0.327884286	0.035466225	-0.030540443	0.436014276	0.042064236	-0.018712264	0.156933698	0.032068748	0.026648935	0.103104724
Uller_As183	-0.133007212	-0.051316228	0.091745369	-0.328917749	0.204658814	-0.108772049	-0.264972721	0.161018115	-0.052228893	0.195563952	-0.016058968	0.045974905	-0.121057856	0.042502959	0.114963574	-0.185459492	-0.168029395	-0.075333761	-0.208643038	-0.185001443	-0.062112544	-0.109403668	-0.207248926	-0.104688075	-0.124536449	-0.012007045	0.042985445	-0.017678502	0.075977041	0.058640419	-0.033529306	-0.020308388	0.044501908	-0.022856499	0.104012874	-0.091281254	0.276447605	0.054401693	0.028198137	0.329258504	0.025743328	-0.001938172	0.399712373	-0.0045741	-0.036673338	0.183125966	0.045474045	0.033913009	0.145467846
Uller_As184	-0.145479127	-0.050214714	0.095122434	-0.317463676	0.181280003	-0.099484257	-0.241588217	0.167677761	-0.041166003	0.145368346	0.016092521	0.071709525	-0.126691885	0.020761757	0.125887126	-0.149073137	-0.180041615	-0.091746488	-0.171728896	-0.185930686	-0.070198487	-0.062656357	-0.204208878	-0.080050779	-0.151279626	-0.001590116	0.019652319	-0.062867567	0.087713438	0.041889145	-0.059282709	0.004467692	0.04523469	0.006792941	0.135942553	-0.080404945	0.280400067	0.02291581	0.009122693	0.348661783	0.002740777	-0.027612289	0.424275928	-0.008490098	-0.070090747	0.175019072	0.030351095	0.048852784	0.109072576
Uller_As185	-0.165876814	-0.00079882	0.09389067	-0.276558686	0.24295482	-0.07891427	-0.215274301	0.16926476	-0.051918905	0.147049125	-0.021703894	0.049522408	-0.146413546	0.02442196	0.10824678	-0.164994298	-0.199922795	-0.059949704	-0.175736147	-0.205323034	-0.057167238	-0.074848883	-0.239529636	-0.050091589	-0.134253441	-0.022915459	0.002710443	-0.034296458	0.053103372	0.034183579	-0.04778613	-0.034191981	0.037290581	0.002254338	0.177753918	-0.060940098	0.252194541	0.031472645	-0.002453538	0.330785758	0.032320199	-0.027020474	0.445411837	0.036463524	-0.050997168	0.147200263	0.041619772	0.046521174	0.102428933
Uller_As186	-0.145321615	-0.045723796	0.086051851	-0.338586776	0.232063306	-0.097912816	-0.254926382	0.183215529	-0.059063869	0.114398388	0.003288251	0.086416402	-0.156416677	0.058414169	0.110262264	-0.107982398	-0.168857342	-0.089275554	-0.122461056	-0.178906224	-0.08918812	-0.016571876	-0.192884649	-0.063057835	-0.139899025	-0.032345082	0.034061973	-0.05153288	0.087980998	0.047932653	-0.069598394	-0.01950904	0.065809168	-0.010926078	0.161739851	-0.093833016	0.276648897	-0.010629995	-0.008481663	0.343790094	-0.011516949	-0.053462705	0.417574979	-0.002183873	-0.087534789	0.16094609	0.007832763	0.056749026	0.104799172
Uller_As189	-0.135849437	-0.004163132	0.107609436	-0.341068723	0.231353793	-0.086039542	-0.27446077	0.174377668	-0.055509407	0.127912608	0.020304812	0.084009095	-0.125057418	0.039716187	0.110137272	-0.135076958	-0.18402934	-0.087700433	-0.143888442	-0.206636101	-0.083403451	-0.022991118	-0.206816547	-0.09639508	-0.139255305	-0.028615191	0.015183729	-0.05651298	0.073547619	0.047205458	-0.053720485	-0.01173851	0.05350442	-0.024112477	0.143397155	-0.094240533	0.283928833	0.00322004	0.016732382	0.329557363	-0.020034092	-0.027351912	0.394510312	-0.034084511	-0.084195645	0.176709392	0.046838641	0.069637843	0.115087507
Uller_As190	-0.118844612	-0.021799886	0.063381081	-0.301916971	0.245618269	-0.073472188	-0.232293585	0.184046284	-0.03816393	0.128049578	-0.004242393	0.062358466	-0.105074032	0.042941604	0.075452265	-0.156145562	-0.221035287	-0.070936226	-0.163171415	-0.238519697	-0.071421971	-0.067215548	-0.241639537	-0.037735592	-0.142650432	-0.02703185	6.03E-06	-0.044973782	0.085779545	0.034895778	-0.063348972	-0.007451838	0.043184391	0.009403603	0.189668155	-0.054685113	0.261913728	0.036495846	0.013214661	0.336950358	0.016302565	-0.028934254	0.407858179	0.015300456	-0.068151202	0.156591622	0.018937336	0.056686582	0.099752627
Uller_As20	-0.119927833	-0.04540435	0.084385951	-0.297587925	0.24034945	-0.072617022	-0.238078597	0.179168036	-0.030869056	0.098809248	0.044900619	0.054193005	-0.117730189	0.03334568	0.120907235	-0.129989065	-0.203014836	-0.075743253	-0.152069509	-0.215630365	-0.061555665	-0.038648499	-0.219692284	-0.061000672	-0.158074895	-0.016747611	-0.010789135	-0.091978861	0.076404858	0.014088144	-0.080895438	0.001533122	0.038098494	0.004835769	0.146313203	-0.069696045	0.284493397	0.013617264	0.009501022	0.344446489	0.00491661	-0.030301983	0.428516891	-0.00439951	-0.07819378	0.156777581	0.013511811	0.069271653	0.117492293
Uller_As21	-0.121311833	-0.038864294	0.083203347	-0.305841175	0.191538201	-0.090486052	-0.236028919	0.157338805	-0.044539694	0.115606488	-0.015857934	0.049051795	-0.121429704	0.028297003	0.106935394	-0.16080639	-0.186551214	-0.064813705	-0.178433548	-0.193985094	-0.049622034	-0.074182355	-0.226442873	-0.059982986	-0.141088205	-0.005802278	-0.002290489	-0.039139293	0.075667618	0.034942692	-0.053633174	0.005358465	0.041680866	0.005064413	0.183509254	-0.034151056	0.262468824	0.029728227	0.005396186	0.35362778	0.034677989	-0.026712545	0.471436683	-0.005360409	-0.056665474	0.14794017	0.02254497	0.034288868	0.082131374
Uller_As25	-0.133291466	-0.061051889	0.073719156	-0.317248049	0.212320444	-0.085206255	-0.246226585	0.183020149	-0.056116585	0.116855752	0.015819058	0.08301389	-0.127534957	0.023010854	0.104309848	-0.151464039	-0.194021016	-0.069770706	-0.164212926	-0.210840951	-0.058041822	-0.043275854	-0.214476945	-0.082565574	-0.142977478	0.003041736	0.004343424	-0.043876187	0.0987453	0.04250696	-0.065210141	-0.001163179	0.043410324	0.014584395	0.161130299	-0.075174551	0.268205904	0.010028058	0.006792844	0.332861883	0.004731647	-0.039479642	0.41602407	-0.000989846	-0.084902347	0.166146128	0.027824592	0.077263974	0.114090422
Uller_As26	-0.147756368	-0.052838919	0.085086185	-0.29047406	0.221284355	-0.071564497	-0.213273861	0.178680411	-0.034752494	0.121371121	0.012771648	0.043017451	-0.137778907	0.029999648	0.111884993	-0.1664175	-0.199428859	-0.067978861	-0.181715945	-0.210329555	-0.055957417	-0.075265181	-0.232889063	-0.04563313	-0.157239069	-0.01614913	0.0090017	-0.054010127	0.085277394	0.025742761	-0.059029223	-0.008881107	0.036325387	0.030185273	0.163508243	-0.075029136	0.270299707	0.017520044	-0.002092304	0.34170355	0.031446272	-0.015297889	0.419523133	0.043498156	-0.041080009	0.161225428	0.008473169	0.039420124	0.137024586
Uller_As27	-0.149329294	-0.028714845	0.080526839	-0.285571625	0.212968906	-0.090326769	-0.229527527	0.171302656	-0.061081648	0.145924709	-0.017306705	0.0463723	-0.118455395	0.035103325	0.107813951	-0.162510045	-0.198638862	-0.067076379	-0.18315094	-0.206497653	-0.043932221	-0.090126334	-0.213430878	-0.064797394	-0.147968658	-0.013582354	0.018121444	-0.044677901	0.061289214	0.038796514	-0.054936254	-0.02113095	0.049152638	0.01157592	0.175574543	-0.05225921	0.270869431	0.032083338	0.011517843	0.346703389	0.028748548	-0.022465405	0.430345822	0.03803817	-0.057129655	0.159132399	0.016058	0.041811824	0.107955472
Uller_As3	-0.14090666	-0.06443442	0.086629713	-0.288013086	0.210011968	-0.085293056	-0.21387466	0.162388163	-0.045876852	0.12785489	0.020921091	0.063865027	-0.117229515	0.034930955	0.121225684	-0.177488926	-0.198901799	-0.077054766	-0.187967104	-0.20458806	-0.055917997	-0.074971037	-0.214910604	-0.075079901	-0.137784935	-0.009867256	0.018566198	-0.051606296	0.069299867	0.036368934	-0.058665866	0.008057596	0.046108901	-0.009839773	0.147364565	-0.076128388	0.275687623	0.026691948	0.006490123	0.360310152	0.024986298	-0.023809123	0.432057015	0.015820571	-0.053292088	0.158413948	0.025412568	0.052239025	0.098462763
Uller_As30	-0.1446958	-0.063695058	0.06982041	-0.270899547	0.211888018	-0.076662925	-0.205651654	0.164124356	-0.034164513	0.105630858	0.010843163	0.046742255	-0.114112697	0.029679361	0.117718896	-0.17329809	-0.193940236	-0.056096762	-0.189642964	-0.203878203	-0.03549394	-0.078477167	-0.218541448	-0.060911185	-0.152644074	-0.007296642	0.003774528	-0.06488196	0.079675607	0.022195778	-0.06929728	0.000105478	0.039784673	0.00175835	0.160376149	-0.069383423	0.270872128	0.026391099	0.006230949	0.34686043	0.035499935	-0.015549036	0.465404158	0.042434259	-0.050473846	0.163201719	0.001058623	0.038515748	0.113014145
Uller_As31	-0.138745781	-0.036618708	0.093175745	-0.299860165	0.256135265	-0.079564048	-0.228287907	0.195229726	-0.035181042	0.124889513	-0.025856109	0.011487066	-0.101060052	0.040905979	0.08737983	-0.175361685	-0.199293089	-0.040661174	-0.190215362	-0.228514167	-0.043755073	-0.088319188	-0.232977807	-0.040998803	-0.141531302	-0.025746427	0.01070432	-0.042260519	0.063560637	0.028163027	-0.061859293	-0.021509113	0.038458573	0.035744243	0.163975753	-0.053203175	0.270183375	0.018832866	0.001036026	0.333242959	0.042093896	-0.002878529	0.424586852	0.076004324	-0.00534419	0.159900668	0.003438119	0.006552413	0.117604013
Uller_As36	-0.14398073	-0.043217461	0.08857614	-0.279357687	0.231246267	-0.073170735	-0.229812105	0.181528361	-0.038946479	0.113000561	0.009216346	0.033755288	-0.120222364	0.036657199	0.112207309	-0.176733234	-0.209727378	-0.056274484	-0.185633618	-0.223765617	-0.038569258	-0.081342937	-0.241687038	-0.051298989	-0.14359803	-0.026669889	0.012455468	-0.040447592	0.079783769	0.019385962	-0.062190313	-0.016697278	0.024688262	0.033456254	0.173262352	-0.039868389	0.274293912	0.015505483	-0.009387975	0.34806723	0.03182026	-0.008904817	0.425205185	0.047045304	-0.019598335	0.15000473	0.011591265	0.020803927	0.105854123
Uller_As39	-0.129906876	-0.004925249	0.101174682	-0.297598037	0.211227887	-0.073347438	-0.234003632	0.16433415	-0.045216835	0.086713557	-0.008344948	0.03819115	-0.127725596	0.055115215	0.10611701	-0.153292438	-0.175346109	-0.064645597	-0.161237733	-0.18926788	-0.058828042	-0.067812154	-0.221478789	-0.063956037	-0.13204609	-0.032094496	0.025373484	-0.053898977	0.053213022	0.041881415	-0.058955801	-0.014298845	0.042000619	-0.005588134	0.154286619	-0.060101737	0.252037584	0.021983362	-0.007983014	0.33177111	0.033309619	-0.026580168	0.526288978	0.007385936	-0.03764294	0.123068926	0.014209783	0.02900618	0.102061726
Uller_As41	-0.163837234	-0.044290651	0.070856158	-0.302877953	0.227727308	-0.10287148	-0.233042231	0.192645631	-0.048580749	0.127990528	-0.043216516	0.034889896	-0.140277051	0.056848057	0.097137919	-0.171374061	-0.189291734	-0.056495285	-0.189969327	-0.183821333	-0.039580119	-0.088371021	-0.221619351	-0.049269062	-0.12243238	-0.026962049	0.033391642	-0.016367748	0.05907745	0.047193297	-0.038011604	-0.026245342	0.055528266	0.019648744	0.171732626	-0.063922288	0.258322097	0.026096259	-0.009021534	0.336531893	0.054187562	-0.012546684	0.436022514	0.068122122	-0.0325676	0.158867541	-0.026727973	0.020423683	0.117651642
Uller_As43	-0.148624522	-0.007804125	0.087456721	-0.328130063	0.186005493	-0.104551067	-0.261027112	0.165919452	-0.047473571	0.121493551	-0.005587531	0.087606324	-0.146102098	0.050830624	0.095977136	-0.149256666	-0.156230424	-0.082554013	-0.164680841	-0.167170624	-0.06189769	-0.067049271	-0.191149571	-0.096462681	-0.124712352	-0.018557298	0.02336565	-0.032159221	0.055768404	0.075277852	-0.037411932	-0.018106306	0.059146897	-0.021577417	0.113009146	-0.085227017	0.279156364	0.012173395	0.002751352	0.347254769	0.017402529	-0.039785547	0.474686598	-0.004210379	-0.076428483	0.148981348	0.026086966	0.048470182	0.093918511
Uller_As44	-0.152350818	-0.036423749	0.08028645	-0.281802837	0.234457628	-0.108296504	-0.211622604	0.177231597	-0.069650164	0.151509955	-0.030346437	0.067473434	-0.128087989	0.034387193	0.102102032	-0.176798538	-0.191470852	-0.063822837	-0.189230674	-0.206257783	-0.050499496	-0.074209922	-0.227431384	-0.066901529	-0.145025566	-0.037473593	0.013607926	-0.035173554	0.060788305	0.05397586	-0.049879597	-0.035267173	0.047051195	0.012113356	0.198443865	-0.059681856	0.260842753	0.042906607	0.009799664	0.331951065	0.03742073	-0.031752502	0.406016906	0.034277041	-0.078044338	0.160335534	0.028100648	0.059105967	0.105319776
Uller_As46	-0.164988339	-0.058493052	0.061639446	-0.299945971	0.220906722	-0.096913186	-0.240246072	0.185539342	-0.049182373	0.144899311	-0.066269342	0.035018108	-0.139767808	0.050798406	0.092099856	-0.188690718	-0.160313367	-0.034731347	-0.196777548	-0.187117609	-0.045094283	-0.10639557	-0.222211466	-0.052511965	-0.117816318	-0.020815195	0.02879881	-0.003673282	0.041074139	0.043029863	-0.032565505	-0.039108452	0.044022072	0.012867057	0.172249949	-0.070896758	0.272471893	0.045600201	0.00171656	0.343129471	0.055423502	-0.009720011	0.429120562	0.052251848	-0.030061092	0.158827317	0.02130228	0.021137848	0.115435751
Uller_As49	-0.136796019	-0.06777064	0.071140234	-0.301939433	0.232399976	-0.104380442	-0.244270873	0.20152967	-0.066021696	0.148258108	-0.033070198	0.08072868	-0.135289841	0.038449973	0.105364818	-0.168331984	-0.176166977	-0.060844181	-0.185341223	-0.206404145	-0.064651386	-0.064417111	-0.231569718	-0.062573575	-0.134769646	-0.014085083	0.02602428	-0.026458956	0.066224293	0.054833715	-0.049854079	-0.017894622	0.068129424	0.025090905	0.166871239	-0.082534858	0.262568824	0.020899696	0.012654892	0.330946109	0.038619898	-0.029832368	0.393146986	0.035737615	-0.064672931	0.180620926	0.027961562	0.034790191	0.096601804
Uller_As51	-0.139615161	-0.040387635	0.093678626	-0.306027749	0.23649555	-0.083123983	-0.226623388	0.177825976	-0.038392337	0.115156079	0.010721967	0.053155808	-0.122584484	0.032379973	0.11401643	-0.142078696	-0.2050676	-0.075967465	-0.167530066	-0.213506305	-0.064867452	-0.060700656	-0.22982052	-0.050368286	-0.153746738	-0.018572646	0.009102192	-0.058717406	0.087433705	0.021128048	-0.062951749	-0.004164901	0.036025162	0.022872212	0.16273544	-0.060566177	0.273400157	0.00895779	-0.002810162	0.340295874	0.020966637	-0.02634685	0.416094586	0.027378677	-0.051229192	0.158187005	0.009574877	0.041717686	0.116259994
Uller_As65	-0.156719997	-0.036431812	0.068100052	-0.293607639	0.193062652	-0.092829749	-0.234910347	0.162104104	-0.045700862	0.147660285	-0.034778579	0.040816811	-0.141429249	0.022110084	0.085821228	-0.190849227	-0.167014644	-0.055472693	-0.206334291	-0.169738571	-0.045785996	-0.109967583	-0.204507939	-0.051883078	-0.128150737	-0.008974519	0.041974545	-0.02329494	0.060494969	0.044629113	-0.046448397	-0.027322428	0.040576293	0.001362592	0.155321719	-0.080591677	0.285809731	0.043942449	0.017241668	0.360840325	0.045767791	-0.010224044	0.441030752	0.055571303	-0.051240938	0.157952416	0.016414389	0.032088888	0.13369332
Uller_As71	-0.148311937	-0.022794576	0.079051097	-0.285318235	0.257461186	-0.099706253	-0.235352556	0.205728179	-0.065012243	0.151686506	-0.047808702	0.037029632	-0.11724424	0.047116725	0.095813838	-0.162349345	-0.208142482	-0.052872505	-0.186344915	-0.215349451	-0.043035195	-0.073292476	-0.244547832	-0.055640619	-0.130181406	-0.039154213	0.031307568	-0.016015769	0.059233099	0.058901038	-0.04211041	-0.037999655	0.059731929	0.012383895	0.199913708	-0.051675831	0.25718654	0.038181405	-0.00322345	0.323453998	0.041978763	-0.01082147	0.419434955	0.054518027	-0.028482011	0.13741141	0.006930767	0.009128318	0.08332356
Uller_As72	-0.125037675	-0.0300344	0.070627998	-0.310769275	0.22920057	-0.09005214	-0.250182472	0.178862624	-0.055458582	0.141863274	0.006094289	0.087489789	-0.108129714	0.023229828	0.07909717	-0.161840142	-0.186485095	-0.059412839	-0.169987648	-0.208646558	-0.077870789	-0.067785197	-0.236371721	-0.069471478	-0.133748398	-0.022126147	0.038012513	-0.044486284	0.081143861	0.05048791	-0.068701232	-0.013878488	0.054576264	0.030519235	0.157800712	-0.066446201	0.258360573	0.011115809	0.000192936	0.337745939	0.017396887	-0.030398021	0.42540396	0.023396291	-0.060050796	0.156639254	0.022884776	0.02449471	0.103762713
Uller_As73	-0.129111198	-0.008446686	0.110845949	-0.305174317	0.213034236	-0.097752616	-0.248479405	0.169412852	-0.043957602	0.133967966	-0.025664103	0.021688011	-0.128738755	0.045753275	0.112770416	-0.183110284	-0.195121768	-0.060643064	-0.188315126	-0.199685319	-0.054291984	-0.08767884	-0.220343625	-0.091137855	-0.134887339	-0.011780689	0.026163102	-0.021726369	0.061383226	0.054325665	-0.034951658	-0.015117532	0.046542433	-0.000493687	0.135012158	-0.064208989	0.263751509	0.045873788	0.018871568	0.351471277	0.038371317	0.011474501	0.437059942	0.021708911	-0.03213647	0.168766782	0.030778739	-0.002407129	0.097021762
Uller_As75	-0.125993198	-0.040968914	0.106785041	-0.298498213	0.261567893	-0.080271243	-0.236715914	0.193273089	-0.032101084	0.077130836	0.028194453	0.044763734	-0.119577647	0.019341762	0.135918317	-0.127726034	-0.205518896	-0.069185125	-0.140286326	-0.221454025	-0.05789163	-0.027120277	-0.236354067	-0.039884714	-0.160010483	-0.02217614	-0.014233937	-0.085576718	0.097644654	0.003870875	-0.08424199	0.010050312	0.037400366	0.030100664	0.167036886	-0.059232028	0.277443168	0.00484218	-0.002568843	0.335453481	0.017212084	-0.024526278	0.419428749	0.024901726	-0.057508214	0.155357971	-0.027342956	0.045287347	0.123795236
Uller_As77	-0.149732491	-0.049771319	0.069224417	-0.287035222	0.213061573	-0.095540387	-0.22735164	0.170458567	-0.046476202	0.108058548	0.007572051	0.065754592	-0.136864977	0.046970217	0.099462925	-0.165696534	-0.184835962	-0.060287617	-0.172323074	-0.19572528	-0.070654446	-0.06739691	-0.2257754	-0.061880841	-0.129746255	-0.024101107	0.027563527	-0.04443578	0.071804192	0.048698915	-0.058978391	-0.010769442	0.051031449	0.00051148	0.171160744	-0.063908918	0.262122385	0.020860622	0.002442215	0.331725648	0.025688319	-0.033709285	0.454457501	0.020900204	-0.070792732	0.155745647	0.011071201	0.047148058	0.121251206
Uller_As80	-0.132062648	-0.058671727	0.088762286	-0.301780789	0.232544941	-0.08823562	-0.224250957	0.193956773	-0.038725623	0.13051869	0.000668039	0.062603184	-0.124187542	0.043941419	0.116294976	-0.159931986	-0.208532899	-0.079574981	-0.176624359	-0.214080293	-0.05590352	-0.05957165	-0.231844206	-0.046997151	-0.147010636	-0.013935878	-0.004552403	-0.050537095	0.083421329	0.026594775	-0.0654417	-0.012768444	0.054927073	0.022357254	0.170108722	-0.067569964	0.271194399	0.01134652	-0.005951147	0.332638823	0.017406577	-0.029751644	0.402747478	0.042095519	-0.041827247	0.161115123	0.007622215	0.040303383	0.119219588
Uller_As84	-0.108484876	-0.05039333	0.095800928	-0.31265206	0.218995129	-0.075643276	-0.239155042	0.188508212	-0.031054221	0.119775934	0.062539821	0.064431515	-0.101807654	0.022384033	0.121880487	-0.147068435	-0.206958728	-0.0786087	-0.152292468	-0.223182593	-0.0767287	-0.036482669	-0.228839022	-0.064519026	-0.15820891	-0.018880691	-0.011274421	-0.082941543	0.108254322	0.016492429	-0.079948303	0.008412597	0.037738048	-0.003447257	0.164357286	-0.072548678	0.280490201	0.009824387	0.012515844	0.335312682	-0.007594701	-0.030962082	0.401824225	-0.01806857	-0.066284036	0.175942803	0.024935806	0.065939261	0.118207108
Uller_As87	-0.135671327	-0.05315572	0.088884416	-0.311046053	0.228052068	-0.098607435	-0.245571698	0.1801547	-0.060393637	0.154412624	0.039361736	0.06504648	-0.120762341	0.053371449	0.118370986	-0.15917206	-0.207787358	-0.071945587	-0.16336088	-0.215766041	-0.068617503	-0.052232572	-0.227348997	-0.084966683	-0.1261252	-0.026521392	0.024485412	-0.051931013	0.090651479	0.066285843	-0.04964111	-0.003777566	0.063239861	0.007903687	0.186886269	-0.066955125	0.243108129	0.004349569	0.01149736	0.344108041	0.008944346	-0.029818981	0.39967802	0.005941906	-0.042478234	0.161940991	0.010865924	0.022536348	0.083109703
Uller_As88	-0.145607918	-0.042007104	0.095692365	-0.273878695	0.206341068	-0.085440289	-0.202019462	0.179703818	-0.051227435	0.143771739	-0.016557329	0.047835724	-0.11974737	0.001281808	0.108098562	-0.197631629	-0.20029157	-0.047104863	-0.209394388	-0.211594799	-0.03506607	-0.0941511	-0.242191491	-0.061430996	-0.144154357	-0.002635051	-0.000613607	-0.037367436	0.071421017	0.022725763	-0.053983851	-0.005273267	0.035066943	0.018594234	0.188824632	-0.056671083	0.26484222	0.029642921	0.008140754	0.341090978	0.05144148	-0.013230268	0.422771569	0.063431879	-0.039867477	0.168512722	0.003352387	0.040405074	0.127050941
Uller_As91	-0.128585711	-0.052574974	0.080553103	-0.269496753	0.244352169	-0.079402953	-0.20122541	0.202620983	-0.034815822	0.104710864	0.012408576	0.043150463	-0.107397204	0.021728653	0.106817992	-0.168272821	-0.221049674	-0.065852855	-0.18026332	-0.225908543	-0.053460546	-0.071700225	-0.251679066	-0.039485594	-0.137092417	-0.0280031	0.012998098	-0.063887003	0.084836434	0.024122148	-0.074446815	-0.010659994	0.039456093	0.001122175	0.184777425	-0.055775415	0.259240117	0.021141473	-0.005393538	0.330725846	0.031402437	-0.0221301	0.435446865	0.040750826	-0.027158046	0.155880656	0.013227939	0.017170985	0.115749452
Uller_As92	-0.137185689	-0.023527042	0.096092645	-0.28008216	0.230231781	-0.091813859	-0.219235686	0.188119541	-0.021878664	0.110619877	0.017583368	0.055373184	-0.12686802	0.018370407	0.119140134	-0.153898208	-0.200626912	-0.071612979	-0.168259359	-0.220880124	-0.061169279	-0.055317307	-0.244269292	-0.0608298	-0.148970137	-0.03010966	-0.001048321	-0.059524661	0.074453247	0.027809853	-0.061795644	-0.00617853	0.042574787	-0.005707004	0.175594564	-0.071372828	0.26376025	0.018285089	-0.00401542	0.339129184	0.01508644	-0.026496119	0.423483149	0.013444468	-0.051660276	0.159465937	0.026169236	0.046527271	0.124513875
Uller_As93	-0.139437718	-0.035530968	0.074667441	-0.279762175	0.225656237	-0.081285207	-0.216491582	0.169860901	-0.046918008	0.103765972	-0.00777287	0.064916873	-0.125482047	0.023000648	0.094810049	-0.173892191	-0.191884494	-0.062597924	-0.190118703	-0.213155437	-0.048959036	-0.07763029	-0.238645173	-0.048074564	-0.141136721	-0.015650092	0.0007654	-0.042109165	0.070970968	0.027796398	-0.056644315	-0.002446288	0.047112447	0.019937811	0.182841142	-0.061733233	0.273933388	0.021239789	0.002195195	0.341573375	0.042653174	-0.029483322	0.429621288	0.051342392	-0.063446189	0.160496393	0.013599632	0.053461413	0.12471139
Uller_As96	-0.139918385	-0.050189557	0.079285995	-0.279884811	0.224596017	-0.091715129	-0.229084929	0.17061803	-0.066291183	0.135916173	-0.000617709	0.074852532	-0.13097217	0.024647028	0.117966579	-0.147434155	-0.191897563	-0.074363372	-0.165483521	-0.20455482	-0.079000265	-0.061165466	-0.229123353	-0.061898603	-0.151829245	-0.007077916	0.011402548	-0.04844995	0.076219561	0.049334429	-0.054833823	-0.007353688	0.053784036	-0.010722798	0.170688695	-0.074743996	0.269318048	0.028183774	0.005403457	0.329435486	0.019849973	-0.031972926	0.431772306	0.00209823	-0.094013939	0.160373288	0.030093756	0.065790409	0.089316134
Uller_As99	-0.119376558	-0.075416458	0.092985561	-0.291426082	0.224112907	-0.066382496	-0.217512922	0.167831495	-0.024632552	0.0742381	0.081439748	0.052785195	-0.122737367	0.031543209	0.119696535	-0.126306471	-0.204596346	-0.072248212	-0.137739723	-0.232918714	-0.056196688	-0.031941221	-0.210348095	-0.079674368	-0.158159791	-0.021537988	0.007827869	-0.102070071	0.107690426	0.019086988	-0.086795822	0.012393843	0.034834431	-0.00230908	0.1602019	-0.060942571	0.286205053	0.010574207	0.011676016	0.349610377	0.002366162	-0.022902933	0.456001812	-0.046831801	-0.072321088	0.14022721	0.018473406	0.050522862	0.109351956
UMMZ_73630	-0.157472797	-0.015038915	0.05571172	-0.2486225	0.184918931	-0.084562612	-0.21578215	0.179173327	-0.044324103	0.139186064	-0.006225725	0.069210605	-0.116949915	0.102649783	0.088459448	-0.132567341	-0.181223215	-0.040994642	-0.173418932	-0.243240034	-0.091613973	-0.073284872	-0.283117891	-0.090272891	-0.142211328	-0.010541381	0.013799334	-0.047050122	0.072411551	0.055960039	-0.067405989	-0.013250398	0.050149875	-0.050988924	0.174937835	-0.026542727	0.243367753	0.037884025	0.012039647	0.339391911	0.030206584	-0.042588048	0.455831872	-0.010706413	-0.086626721	0.140097416	0.023792166	0.057577773	0.105755989
UMMZ_73635_1	-0.162719328	-0.04429221	0.071016224	-0.252758611	0.162038767	-0.05983507	-0.204192543	0.161715583	-0.014256547	0.103705608	0.026352785	0.054021623	-0.118657657	0.098175556	0.086732598	-0.129373964	-0.167884421	-0.034416872	-0.157174823	-0.215197764	-0.077090318	-0.049349313	-0.243769317	-0.086044126	-0.162504628	-0.006092627	-0.00133362	-0.089442704	0.075509952	0.031464937	-0.086853781	-0.00513207	0.040975302	-0.064292772	0.161275241	-0.041226205	0.258180326	0.02618668	-0.005825228	0.368986297	0.021112217	-0.041782748	0.506584826	-0.03442712	-0.06278894	0.134957667	0.014821367	0.049935322	0.112527628
UMMZ_73635_2	-0.155410063	-0.035118084	0.068669838	-0.262090776	0.183374286	-0.055334407	-0.209128032	0.180991704	-0.012165932	0.098821073	0.04519199	0.073896509	-0.103601376	0.101496376	0.098079181	-0.12633705	-0.181028559	-0.038907021	-0.129545437	-0.247931005	-0.092368105	-0.022792208	-0.264253136	-0.069686022	-0.177297359	0.004136133	-0.026186689	-0.100536322	0.081358141	0.019652335	-0.102128003	-0.008676292	0.026112244	-0.032721645	0.170199215	-0.037219891	0.266150754	0.011224224	-0.004454417	0.348669735	-0.007513193	-0.051808216	0.46444468	-0.015966716	-0.087817551	0.145103729	0.012926352	0.077911488	0.114236561
USNM_160728	-0.170252463	-0.092141941	0.067575112	-0.273815389	0.226486538	-0.08459776	-0.183466248	0.169211061	-0.04092345	0.135373527	-0.010862495	0.039868109	-0.124017434	0.011462219	0.105978859	-0.178709347	-0.170499112	-0.040221787	-0.192026959	-0.184675361	-0.042097502	-0.088111116	-0.217865946	-0.040224592	-0.173587434	-0.02510885	-0.00194572	-0.05538966	0.068500819	0.016343085	-0.075415149	-0.014860621	0.044214766	0.019104885	0.164953927	-0.075850859	0.268000719	0.038850277	0.009304655	0.356031072	0.052540222	-0.020666945	0.437893339	0.053216633	-0.060805476	0.174240137	0.003986391	0.033303446	0.125632557
USNM_259373	-0.163173521	-0.064509002	0.082636575	-0.267952179	0.237895286	-0.071419187	-0.199340623	0.169426557	-0.041067475	0.120545183	-0.005131684	0.037858097	-0.133570903	0.014179201	0.11960042	-0.171414701	-0.176992667	-0.036943378	-0.177501645	-0.198395295	-0.035310441	-0.066216263	-0.207311856	-0.048179393	-0.161859545	-0.044612947	-0.006265451	-0.069665367	0.068659267	0.021663241	-0.072432786	-0.026779219	0.023334558	0.008698748	0.171393481	-0.074588841	0.271832712	0.047457913	0.015932293	0.348371546	0.029018158	-0.028603834	0.456587598	0.028759341	-0.048745612	0.158964113	0.012620539	0.040037569	0.114584434
USNM_259376	-0.161422053	-0.058734917	0.0745351	-0.281586344	0.232010526	-0.073736003	-0.208133838	0.164860334	-0.031831523	0.119560506	0.009913287	0.051543782	-0.114649177	0.047227155	0.108809015	-0.154044557	-0.179930016	-0.049768286	-0.176377958	-0.192084879	-0.028073046	-0.063571184	-0.205132371	-0.056286546	-0.15821452	-0.046248504	-0.014575359	-0.071475574	0.067388992	0.017056233	-0.077286175	-0.030873613	0.016318424	-0.001457165	0.177387181	-0.07339243	0.279268734	0.0268997	0.014283215	0.346886519	0.030146892	-0.024567497	0.446212328	0.027666026	-0.068370369	0.160164342	0.012652564	0.054417013	0.132457559
USNM_315901	-0.173344421	-0.056978878	0.060046636	-0.293525546	0.209186358	-0.079283119	-0.219503228	0.165166291	-0.041618568	0.095502636	0.019877288	0.059393982	-0.144558966	0.038665869	0.099404748	-0.131116679	-0.170020844	-0.062657222	-0.154182365	-0.18507846	-0.046122777	-0.057493069	-0.211958867	-0.063595848	-0.135546376	-0.01612996	0.028235641	-0.073956714	0.06350941	0.03053818	-0.070039859	-0.004560478	0.038136201	-0.036638563	0.152788471	-0.044955154	0.276243341	0.018906471	-4.16E-05	0.355418869	0.015116301	-0.042582186	0.480966231	-0.013865825	-0.064712929	0.152060363	0.014498735	0.041878835	0.120331845
USNM_315904	-0.163672813	-0.088677669	0.054091531	-0.293443085	0.221636956	-0.071174039	-0.223338399	0.162207682	-0.047379577	0.126624588	0.0043554	0.066133185	-0.148433323	0.054599988	0.081191594	-0.150518727	-0.172077934	-0.039402479	-0.170350954	-0.206006474	-0.055867042	-0.078246894	-0.230605249	-0.067435993	-0.122833968	0.023709991	0.00763616	-0.050817658	0.05155525	0.039117317	-0.0470443	-0.020983474	0.042697736	-0.023639698	0.15868688	-0.052913828	0.263426627	0.032059214	-0.000172692	0.350677763	0.022120231	-0.034937992	0.456806507	-0.006864978	-0.061789768	0.140547279	0.026504648	0.042028062	0.119314848
USNM_315906	-0.152268836	-0.06420822	0.070310476	-0.294910293	0.224061772	-0.077827175	-0.217742251	0.184029415	-0.039158464	0.115759747	0.007549551	0.07609428	-0.139038268	0.053506704	0.095704423	-0.144888142	-0.180849269	-0.069404185	-0.146852427	-0.20814291	-0.07877541	-0.051027273	-0.231500144	-0.057329471	-0.130797397	-0.008658685	0.007202142	-0.051123465	0.064832382	0.036053043	-0.049038465	-0.007448177	0.05618314	-0.042347214	0.147259184	-0.065319334	0.252407429	0.03451805	-0.001609899	0.348196924	0.007136112	-0.042487357	0.462174387	-0.020091865	-0.07462772	0.13967564	0.032319075	0.047418047	0.104079921
USNM_498092	-0.166102634	-0.078392111	0.056056467	-0.267171284	0.192508286	-0.066164296	-0.203676744	0.164629863	-0.039717623	0.094364285	0.01650997	0.063751696	-0.13888065	0.048742034	0.104149462	-0.149213877	-0.185110611	-0.063504905	-0.159160645	-0.198884326	-0.055875779	-0.071358125	-0.219301242	-0.05425811	-0.132948134	-0.022282281	0.008206872	-0.082171798	0.0796137	0.03396801	-0.076078226	-0.004749744	0.046012464	-0.007335769	0.165287965	-0.054689908	0.270154292	0.029111549	-0.001020623	0.36159808	0.022608339	-0.041674925	0.478060171	-0.01165571	-0.0746755	0.159125671	0.026154399	0.045145704	0.099313357
USNM_498099	-0.149811091	-0.071743255	0.07066217	-0.265695373	0.227977019	-0.066041477	-0.20177184	0.188826572	-0.04455792	0.105298854	0.00528167	0.054878961	-0.120113541	0.044579581	0.107521019	-0.146727024	-0.200407491	-0.05575275	-0.168963006	-0.229384628	-0.043462962	-0.084527531	-0.241057035	-0.070778932	-0.140036045	-0.003357761	0.006531739	-0.06117796	0.06458224	0.030699617	-0.062949067	-0.006736863	0.034636511	-0.024756273	0.160718761	-0.064168549	0.252240488	0.033159807	0.000732281	0.337803641	0.037716551	-0.028691383	0.463347056	0.004513805	-0.055189921	0.160494484	0.023997361	0.041253789	0.104168773
USNM_558716	-0.165356032	-0.095376797	0.06283767	-0.265217835	0.234709616	-0.073479368	-0.197478136	0.164012729	-0.037460849	0.115906182	0.002078344	0.043719127	-0.132274165	0.025874192	0.100633664	-0.164627905	-0.173574453	-0.038958159	-0.172406538	-0.187238372	-0.02983603	-0.069099771	-0.212926831	-0.046607347	-0.162286045	-0.027882725	-0.003400669	-0.066954292	0.064558809	0.025268492	-0.072873053	-0.020175573	0.030492655	-0.003251684	0.173465442	-0.068081024	0.268301878	0.036869624	0.004364268	0.345779785	0.036502656	-0.033337665	0.475391077	0.020384606	-0.060019107	0.147328297	0.018575204	0.052373885	0.122522478
USNM_589689	-0.154389199	-0.08630993	0.067934005	-0.257250271	0.244905788	-0.063083678	-0.199935384	0.174329688	-0.032797131	0.084218695	0.027507943	0.058626659	-0.143548096	0.009324351	0.116314657	-0.129362395	-0.163584975	-0.037857479	-0.147625464	-0.196321732	-0.046867673	-0.055620737	-0.203100634	-0.041781746	-0.134175212	-0.024616933	0.009839317	-0.080691336	0.048209525	0.014146199	-0.077036995	-0.013872632	0.026067199	-0.066212623	0.16033183	-0.072372931	0.269379976	0.040866831	-0.009997135	0.3915151	0.007489201	-0.038988428	0.503674314	-0.021732641	-0.057448642	0.110797289	0.034019255	0.047413891	0.096683883
USNM_589691	-0.162016892	-0.081011442	0.070875631	-0.263683407	0.227181105	-0.068034601	-0.21690538	0.218600143	-0.033354443	0.102242329	0.028972993	0.036498183	-0.152613344	0.025777823	0.112468006	-0.118823757	-0.188975105	-0.053895265	-0.126913648	-0.210859842	-0.052909549	-0.031617366	-0.206636647	-0.039376036	-0.120443078	-0.042399112	0.011877567	-0.098303795	0.074396765	0.023792653	-0.079416424	-0.015440637	0.031030624	-0.051091943	0.180640433	-0.054303366	0.255552344	0.031051779	0.012642534	0.366079651	0.000393428	-0.036658968	0.480334338	-0.048303998	-0.07276178	0.122051856	0.023439744	0.036553686	0.100573988
[truncated: 97 more columns]
