# Supplementary figures and images for: Plasticity and evolutionary convergence in the locomotor skeleton of Greater Antillean Anolis lizards
Source: eLife journal article supplement (doi:10.7554/elife.57468), 2020-08-13

**Pectoral girdle**

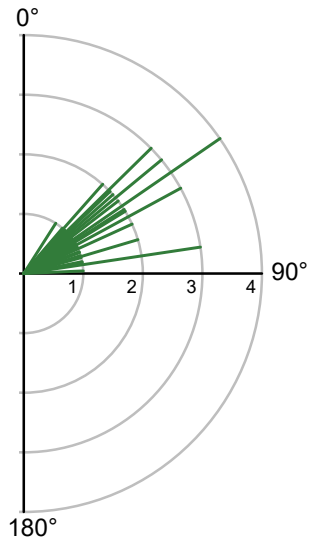

**Pelvic girdle**

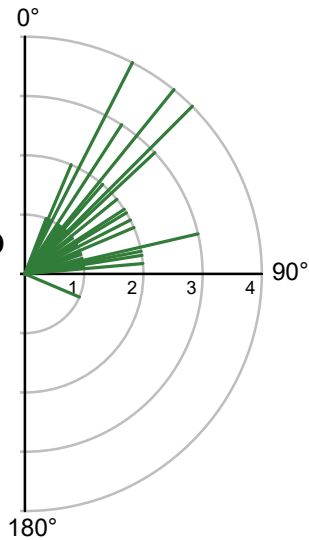

**Limb length**

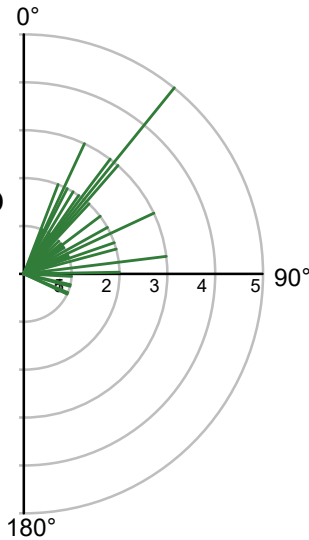

**Bone thickness**

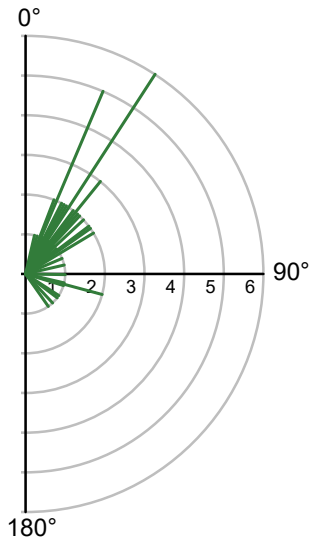

Supplement: supp [file elife-57468-supp-v1.zip › elife_poa_e57468_Figure_4_figure_supplement_1.pdf]

A

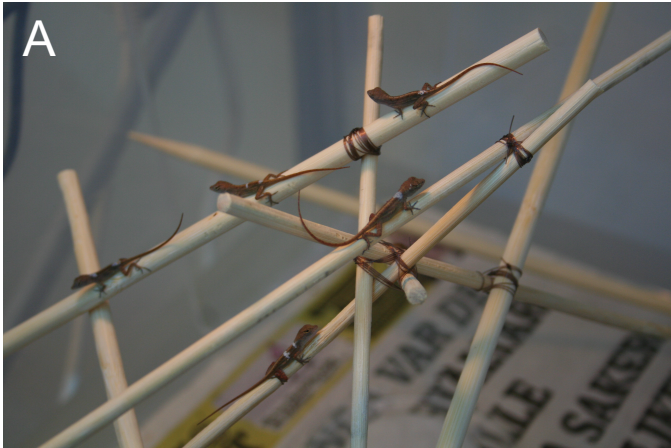

B

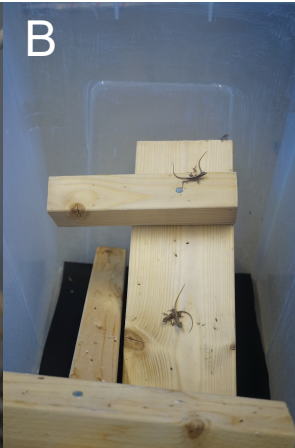

Supplement: supp [file elife-57468-supp-v1.zip › elife_poa_e57468_Figure_4_figure_supplement_2.pdf]
